# Supplementary material
Source: PubMed Central journal article supplement (PMC3855325)

# Supporting Information

## **Ruthenium Catalyzed Hydrohydroxyalkylation of Isoprene with Heteroaromatic Secondary Alcohols: Isolation and Reversible Formation of the Putative Metallacycle Intermediate**

Boyoung Y. Park, T. Patrick Montgomery, Victoria J. Garza and Michael J. Krische\*

*University of Texas at Austin, Department of Chemistry and Biochemistry,  
Austin, TX 78712, USA*

### **Table of Contents:**

|      |                                                                       |     |
|------|-----------------------------------------------------------------------|-----|
| I.   | General Information                                                   | S2  |
| II.  | Spectroscopy, Spectrometry, and Data Collection                       | S2  |
| III. | Experimental Details and Spectral Data                                |     |
|      | a. General Procedure for Synthesis of Pyridyl Methanol <b>1a–1o</b>   | S2  |
|      | b. General Procedure for the Coupling of Isoprene to Pyridyl Methanol | S15 |
|      | c. Characterization of $\pi$ -Allyl Oxaruthenacycle Complexes         | S62 |
|      | d. Ketone Oxidation Level Reaction                                    | S83 |
|      | e. $^1\text{H}$ NMR-Exchange data                                     | S84 |

**I. General Information:** All reactions were run under an atmosphere of argon. Pressure tubes (13x100 mm) were purchased from Fischer Scientific (catalog number 14-959-35C) and were flame dried followed by cooling in a desiccator. Toluene was dried over sodium metal, benzophenone, and distilled immediately prior to use. Anhydrous solvents were transferred by oven-dried syringes. Tricyclohexylphosphine was recrystallized prior to use. Analytical thin-layer chromatography (TLC) was carried out using 0.25 mm commercial silica gel plates (Dynammic Absorbents F<sub>254</sub>). Visualization was accomplished with UV light followed by dipping in Seebach's stain solution then heating. Purification of reactions was carried out by flash column chromatography using Silacycle silica gel (40–63  $\mu\text{m}$ ).

**II. Spectroscopy, Spectrometry, and Data Collection:** Infrared spectra were recorded on a Perkin-Elmer 1600 spectrometer. Low-resolution mass spectra (LRMS) were obtained on a Karatos MS9 and are reported as  $m/z$  (relative intensity). Accurate masses are reported for the molecular ion (M+H or M+Na), or a suitable fragment ion. <sup>1</sup>H Nuclear magnetic resonance spectra were recorded using a 400 MHz spectrometer. Coupling constants are reported in Hertz (Hz) for CDCl<sub>3</sub> solutions, and chemical shifts are reported as parts per million (ppm) relative to residual CHCl<sub>3</sub>  $\delta_{\text{H}}$  (7.26 ppm). <sup>13</sup>C Nuclear magnetic resonance spectra were recorded using a 100 MHz spectrometer for CDCl<sub>3</sub> solutions, and chemical shifts are reported as parts per million (ppm) relative to residual CDCl<sub>3</sub>  $\delta_{\text{C}}$  (77.0 ppm). Melting points were taken on a Stuart SMP3 melting point apparatus.

### **III. Experimental Details and Spectral Data**

#### **a. General Procedure for Synthesis of Pyridyl Methanol 1a–1o:**

2-Bromopyridine (0.48 mL, 5 mmol) was added to <sup>i</sup>PrMgCl (5 mmol) in THF (5 mL) at rt. After 2 hours, aldehyde (6 mmol) was added. After 2 hours at rt, water (25 mL) was added. The reaction mixture was extracted with dichloromethane (3 x 10 mL), dried (Na<sub>2</sub>SO<sub>4</sub>), filtered and concentrated *in vacuo*. The residue was subjected to by flash column chromatography (SiO<sub>2</sub>, 25% EtOAc/hexanes) to furnish the title compounds **1a**,<sup>1</sup> **1b**,<sup>2</sup> **1c**,<sup>3</sup> **1e**,<sup>2</sup> **1f**,<sup>1</sup> **1h**,<sup>4</sup> **1j**,<sup>5</sup> **1k**,<sup>6</sup> **1l**,<sup>5</sup> **1n**<sup>7</sup> and **1o**.<sup>8</sup>

---

<sup>1</sup> *J. Org. Chem.* **2009**, *74*, 3566.

<sup>2</sup> *Tetrahedron* **2012**, *68*, 7613.

<sup>3</sup> *Chem. Commun.* **2008**, *8*, 957.

<sup>4</sup> *J. Am. Chem. Soc.* **1949**, *71*, 887.

<sup>5</sup> *Angew. Chem. Int. Ed.* **1998**, *37*, 3279.

<sup>6</sup> *Tetrahedron* **1984**, *40*, 5185.

<sup>7</sup> *J. Med. Chem.* **1971**, *14*, 546.

<sup>8</sup> *Tetrahedron* **1994**, *50*, 275.

#### 4-Cyanophenyl Pyridyl Methanol (1d).

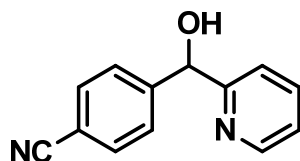

In accordance with the general procedure, 2-bromopyridine (0.48 mL, 5 mmol) was added to *i*PrMgCl (5 mmol) in THF (5 mL) at rt. After 2 hours, 4-cyanobenzaldehyde (828.0 mg, 6 mmol) was added. After 2 hours at rt, water (25 mL) was added. The reaction mixture was extracted with dichloromethane (3 x 10 mL), dried (Na<sub>2</sub>SO<sub>4</sub>), filtered and concentrated *in vacuo*. The residue was subjected to flash column chromatography (SiO<sub>2</sub>, 25% EtOAc/hexanes) to furnish the title compound (796.9 mg, 76% yield) as a brown solid.

**<sup>1</sup>H NMR** (400 MHz, CDCl<sub>3</sub>): δ 8.60–8.58 (m, 1H), 7.69–7.62 (m, 3H), 7.54–7.52 (m, 2H), 7.26–7.23 (m, 1H), 7.15–7.13 (m, 1H), 5.79 (s, 1H), 5.36 (s, 1H).

**<sup>13</sup>C NMR** (100 MHz, CDCl<sub>3</sub>): δ 159.7, 148.5, 148.3, 137.3, 132.4, 127.6, 123.0, 121.2, 118.8, 111.5, 74.5.

**LRMS** (CI) Calcd. for C<sub>13</sub>H<sub>11</sub>N<sub>2</sub>O [M+H]<sup>+</sup>: 211, Found: 211.

**FTIR** (neat): 3181, 2359, 2342, 2228, 1593, 1571, 1503, 1436, 1408, 1275, 1261, 1195, 1097, 1059, 1019, 1003, 870, 811, 764, 750, 668 cm<sup>-1</sup>.

**MP** 76.0–77.0 °C.

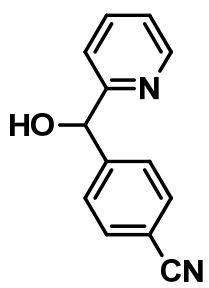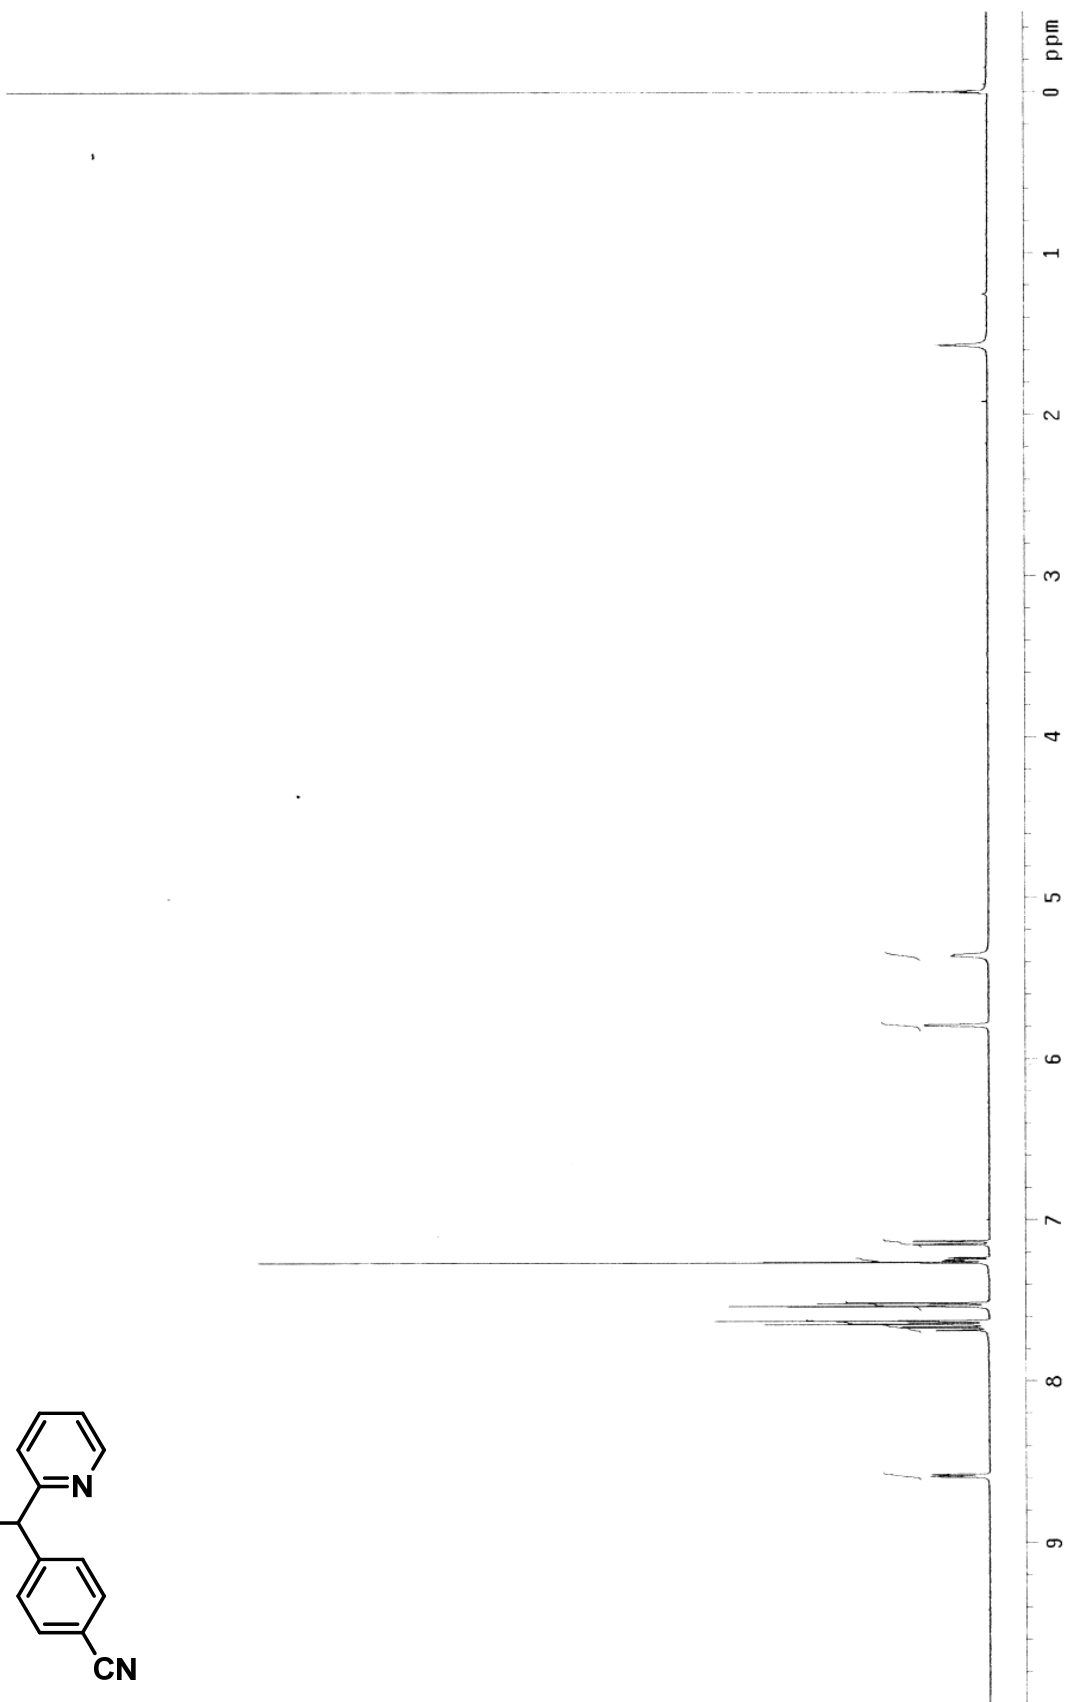

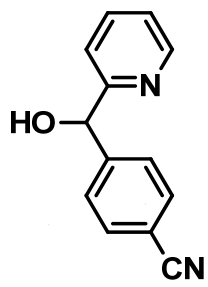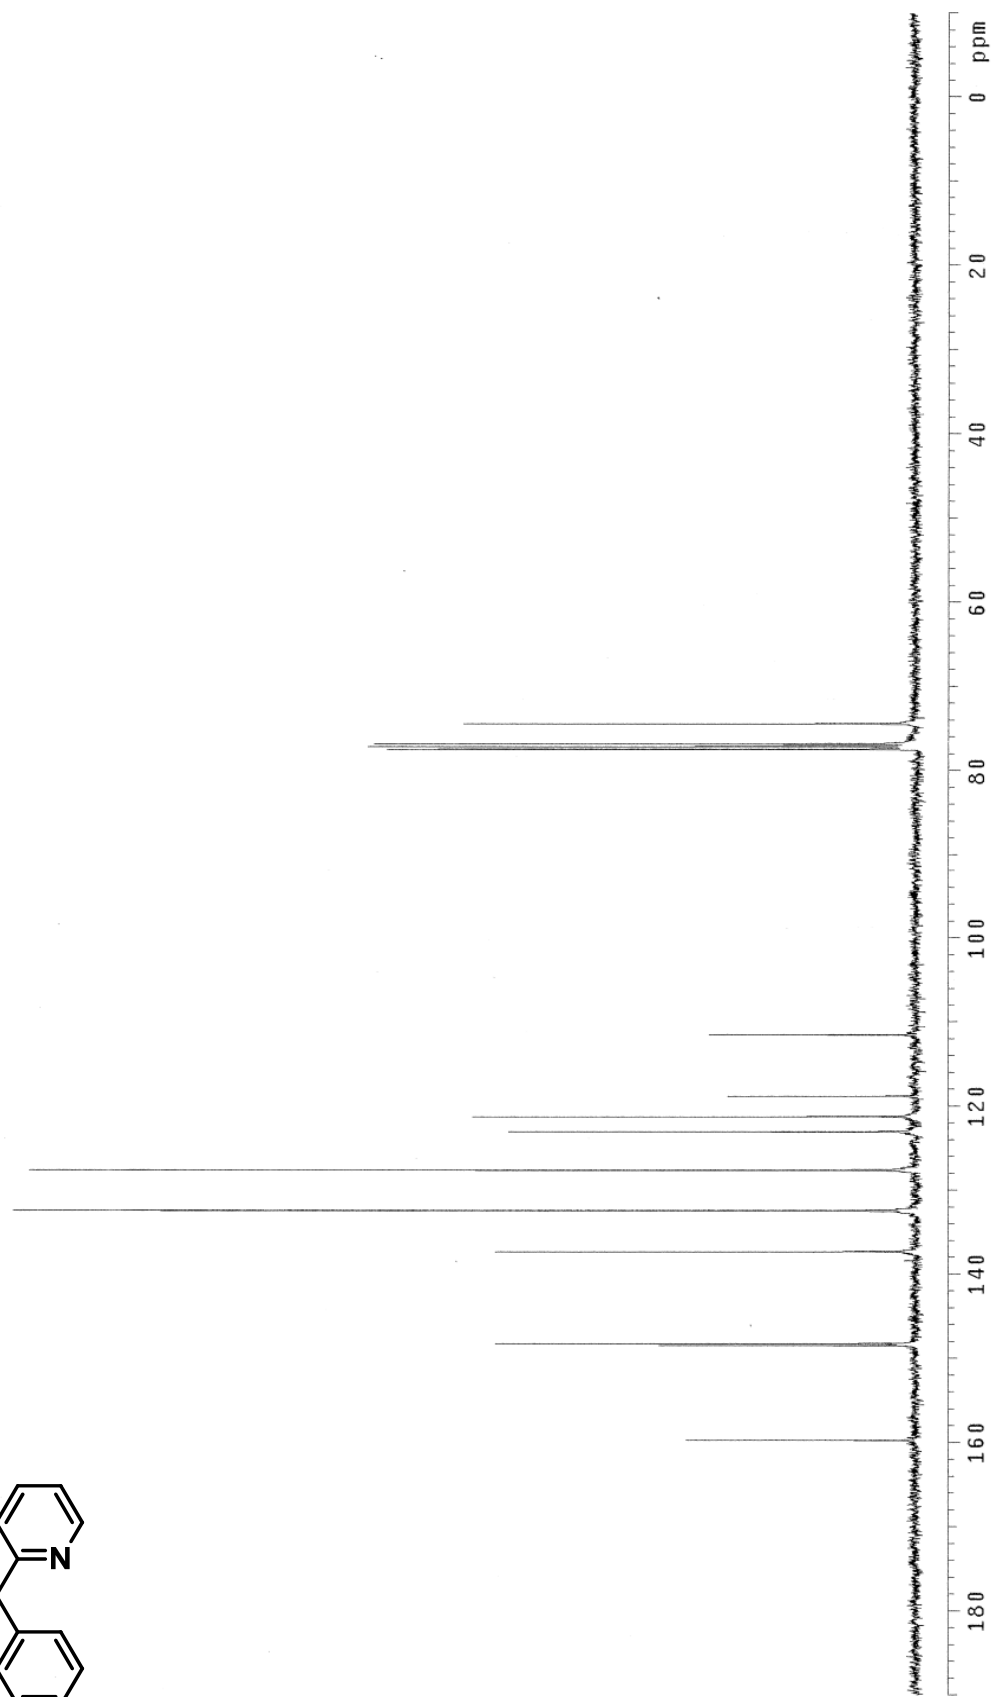

**1,3-Benzodioxole Pyridyl Methanol (1g).**

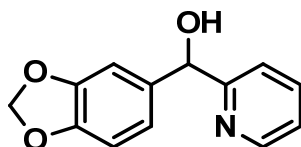

In accordance with the general procedure, 2-bromopyridine (0.48 mL, 5 mmol) was added to <sup>i</sup>PrMgCl (5 mmol) in THF (5 mL) at rt. After 2 hours, piperonal (910.0 mg, 6 mmol) was added. After 2 hours at rt, water (25 mL) was added. The reaction mixture was extracted with dichloromethane (3 x 10 mL), dried (Na<sub>2</sub>SO<sub>4</sub>), filtered and concentrated *in vacuo*. The residue was subjected to flash column chromatography (SiO<sub>2</sub>, 25% EtOAc/hexanes) to furnish the title compound (861.4 mg, 75% yield) as a brown solid.

**<sup>1</sup>H NMR** (400 MHz, CDCl<sub>3</sub>): δ 8.55 (d, *J* = 4.4 Hz, 1H), 7.64–7.60 (m, 1H), 7.21–7.18 (m, 1H), 7.14 (d, *J* = 8.0 Hz, 1H), 6.88 (dd, *J* = 8.0, 1.6 Hz, 1H), 6.79–6.76 (m, 2H), 5.91 (dd, *J* = 4.0, 1.2 Hz, 2H), 5.66 (s, 1H), 5.31 (bs, 1H).

**<sup>13</sup>C NMR** (100 MHz, CDCl<sub>3</sub>): δ 161.0, 148.0, 147.9, 147.3, 137.4, 137.0, 122.5, 121.4, 120.8, 108.2, 107.5, 101.1, 74.8.

**LRMS** (CI) Calcd. for C<sub>13</sub>H<sub>12</sub>NO<sub>3</sub> [M+H]<sup>+</sup>: 230, Found: 230.

**FTIR** (neat): 3148, 2891, 1593, 1571, 1503, 1487, 1470, 1436, 1372, 1334, 1293, 1248, 1214, 1187, 1124, 1102, 1055, 1038, 1003, 928, 869, 846, 802, 765, 742, 724, 716, 667 cm<sup>-1</sup>.

**MP** 71.5–72.5 °C.

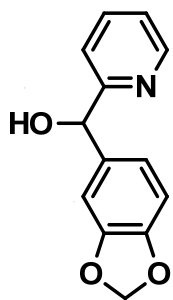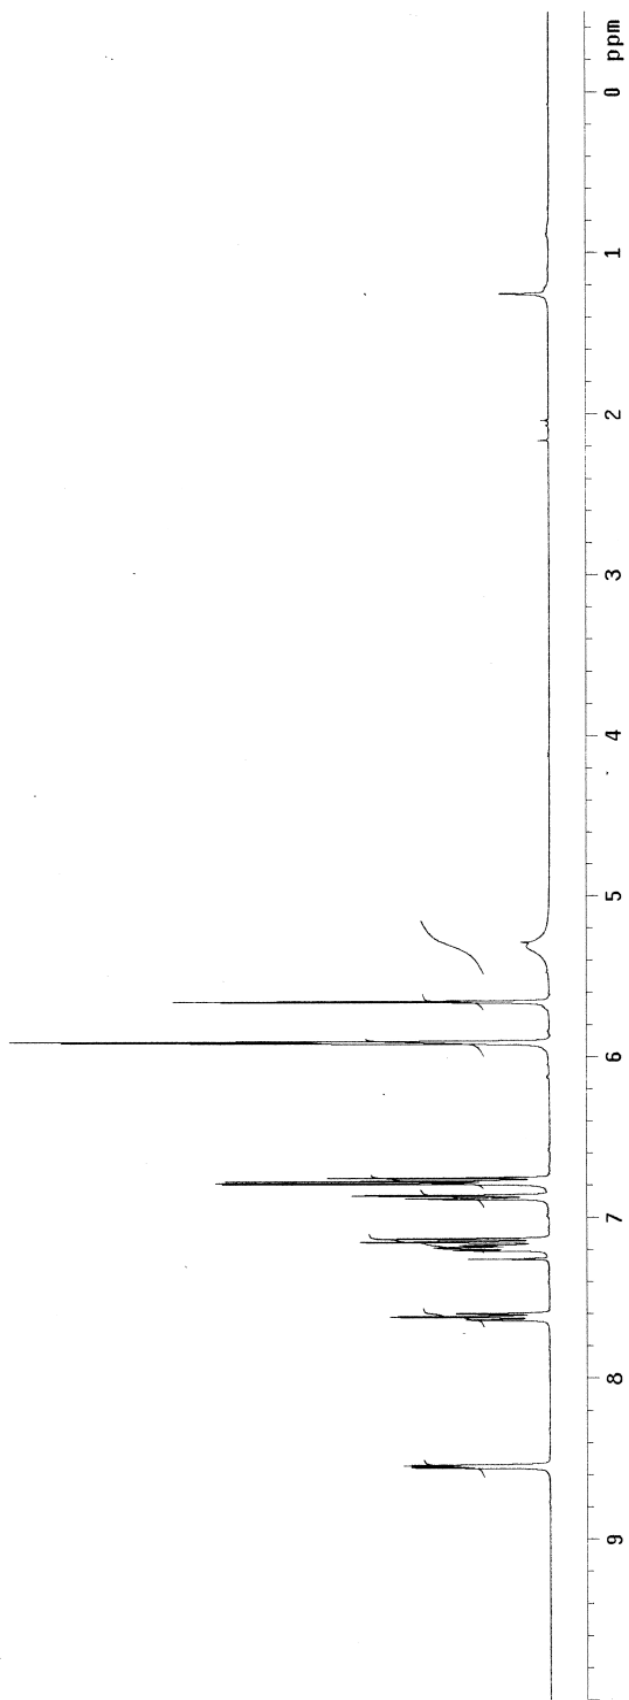

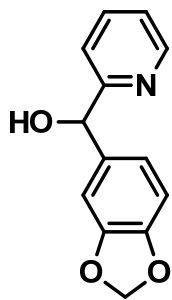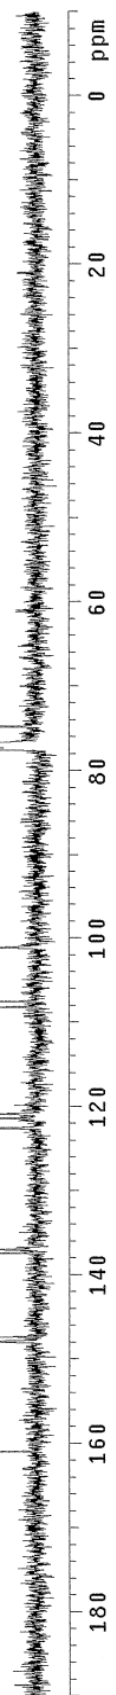



**2-(N-Bn-indolyl) Pyridyl Methanol (1h).**

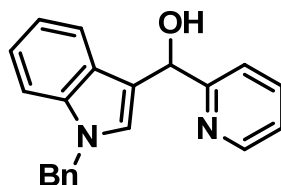

In accordance with the general procedure, 2-bromopyridine (0.48 mL, 5 mmol) was added to <sup>i</sup>PrMgCl (5 mmol) in THF (5 mL) at rt. After 2 hours, N-benzyl-indole-3-carbaldehyde (1.4 g, 6 mmol) was added. After 2 hours at rt, water (25 mL) was added. The reaction mixture was extracted with dichloromethane (3 x 10 mL), dried (Na<sub>2</sub>SO<sub>4</sub>), filtered and concentrated *in vacuo*. The residue was subjected to flash column chromatography (SiO<sub>2</sub>, 25% EtOAc/hexanes) to furnish the title compound (1.1 g, 72% yield) as a yellow solid.

**<sup>1</sup>H NMR** (400 MHz, CDCl<sub>3</sub>): δ 8.63–8.61 (m, 1H), 7.61 (ddd, *J* = 7.6, 7.6, 1.6 Hz, 1H), 7.45 (d, *J* = 8.0 Hz, 1H), 7.32–7.20 (m, 7H), 7.16–7.14 (m, 3H), 7.04–7.00 (m, 1H), 6.08 (s, 1H), 5.28 (s, 2H), 5.04 (bs, 1H).

**<sup>13</sup>C NMR** (100 MHz, CDCl<sub>3</sub>): δ 161.3, 147.8, 137.3, 137.2, 136.8, 128.8, 127.7, 127.4, 126.9, 126.6, 122.4, 122.1, 121.4, 120.1, 119.7, 117.5, 109.9, 69.2, 50.1.

**LRMS** (CI) Calcd. for C<sub>21</sub>H<sub>19</sub>N<sub>2</sub>O [M+H]<sup>+</sup>: 315, Found: 315.

**FTIR** (neat): 3115, 1593, 1572, 1544, 1494, 1465, 1452, 1437, 1397, 1351, 1334, 1307, 1238, 1171, 1095, 1046, 1025, 1001, 761, 733, 707, 693, 664 cm<sup>-1</sup>.

**MP** 113.5–114.0 °C.

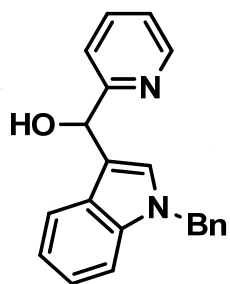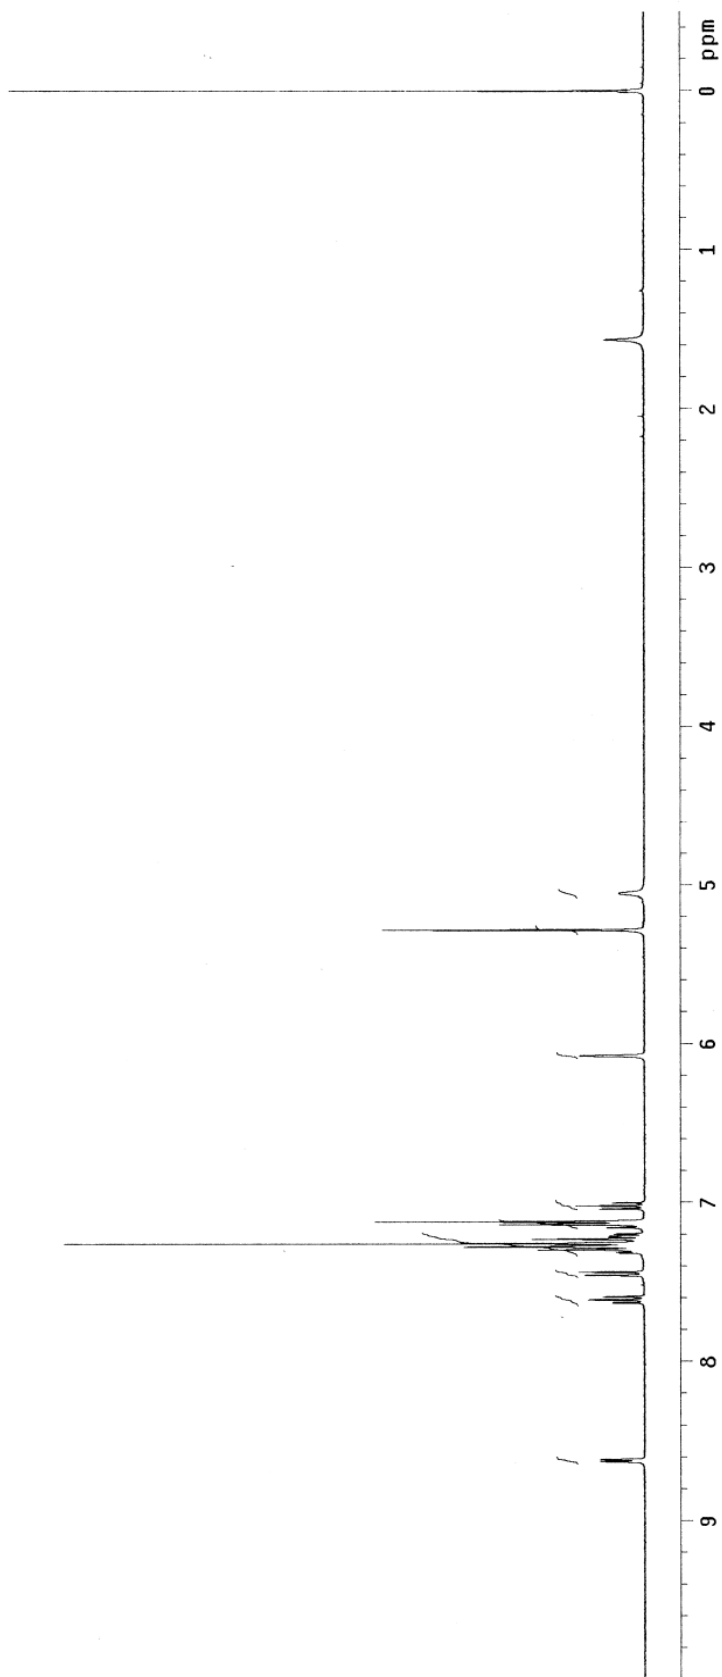

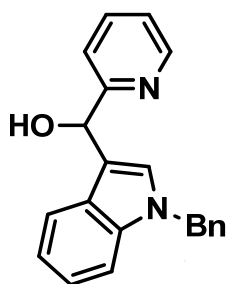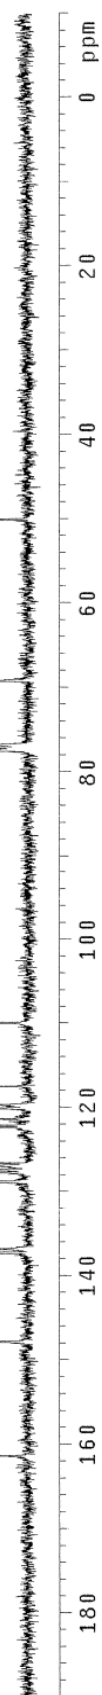

**Thiazolyl Pyridyl Methanol (1o).**

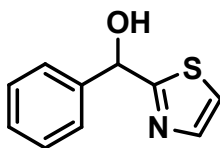

In accordance with the general procedure, 2-bromothiazole (0.46 mL, 5 mmol) was added to <sup>i</sup>PrMgCl (5 mmol) in THF (5 mL) at rt. After 2 hours, benzaldehyde (0.62 mL, 6 mmol) was added. After 2 hours at rt, water (25 mL) was added. The reaction mixture was extracted with dichloromethane (3 x 10 mL), dried (Na<sub>2</sub>SO<sub>4</sub>), filtered and concentrated *in vacuo*. The residue was subjected to flash column chromatography (SiO<sub>2</sub>, 25% EtOAc/hexanes) to furnish the title compound (621.0 mg, 65% yield) as a white solid.

**<sup>1</sup>H NMR** (400 MHz, CDCl<sub>3</sub>): δ 7.68 (d, *J* = 3.2 Hz, 1H), 7.61 (d, *J* = 1.6 Hz, 1H), 7.46 (d, *J* = 1.2 Hz, 1H), 7.39–7.30 (m, 3H), 7.28 (d, *J* = 3.2 Hz, 1H), 6.04 (s, 1H), 4.23 (bs, 1H).

**<sup>13</sup>C NMR** (100 MHz, CDCl<sub>3</sub>): δ 174.5, 142.3, 141.5, 128.7, 128.5, 126.6, 119.6, 73.8.

**LRMS** (CI) Calcd. for C<sub>10</sub>H<sub>9</sub>NaNOS [M+H]<sup>+</sup>: 214, Found: 214.

**FTIR** (neat): 3124, 2853, 1738, 1509, 1495, 1454, 1341, 1282, 1249, 1196, 1183, 1141, 1088, 1064, 1049, 1027, 921, 831, 795, 770, 702, 662 cm<sup>-1</sup>.

**MP** 108.5–109.5 °C.

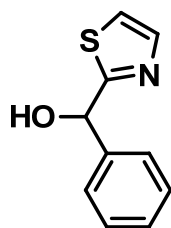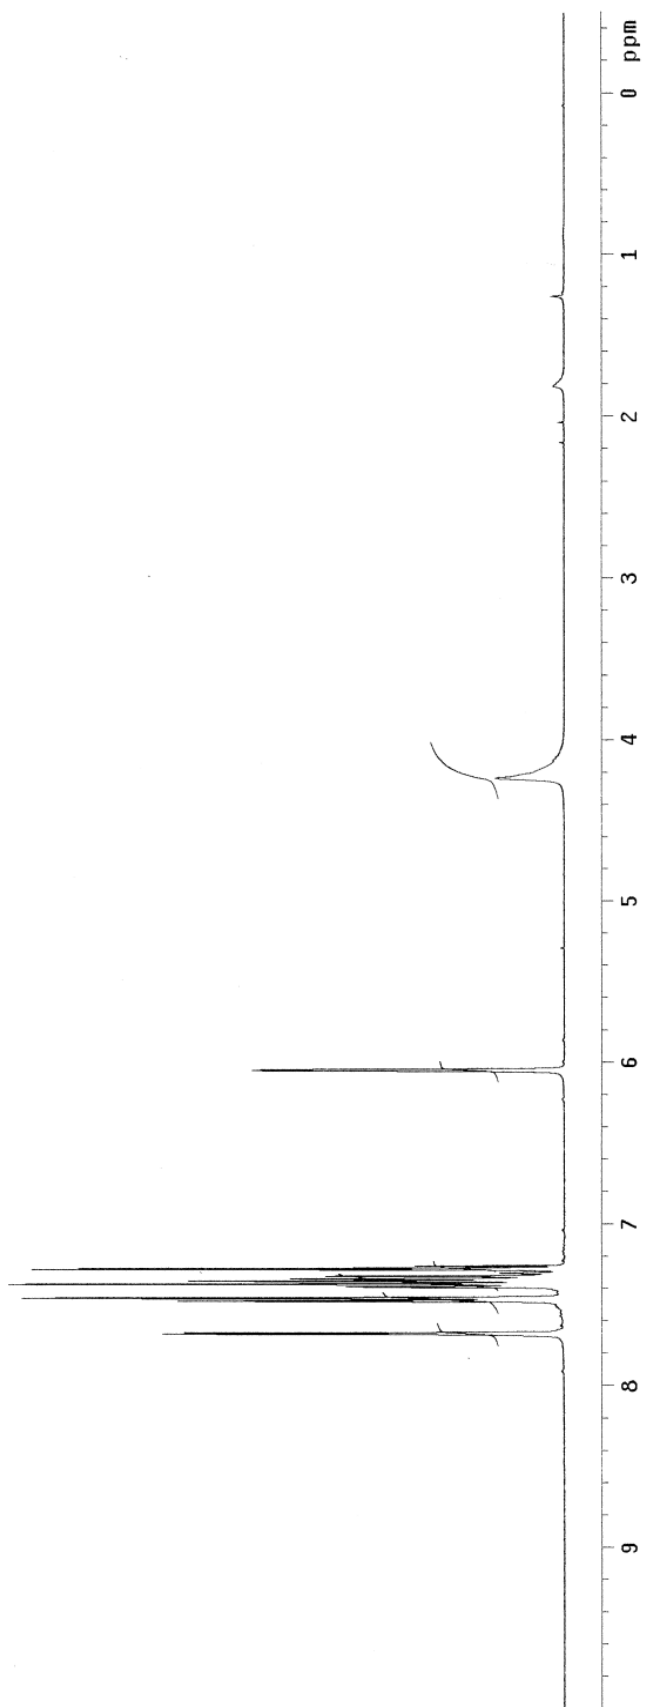

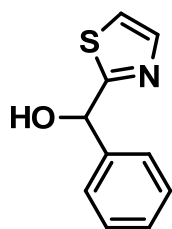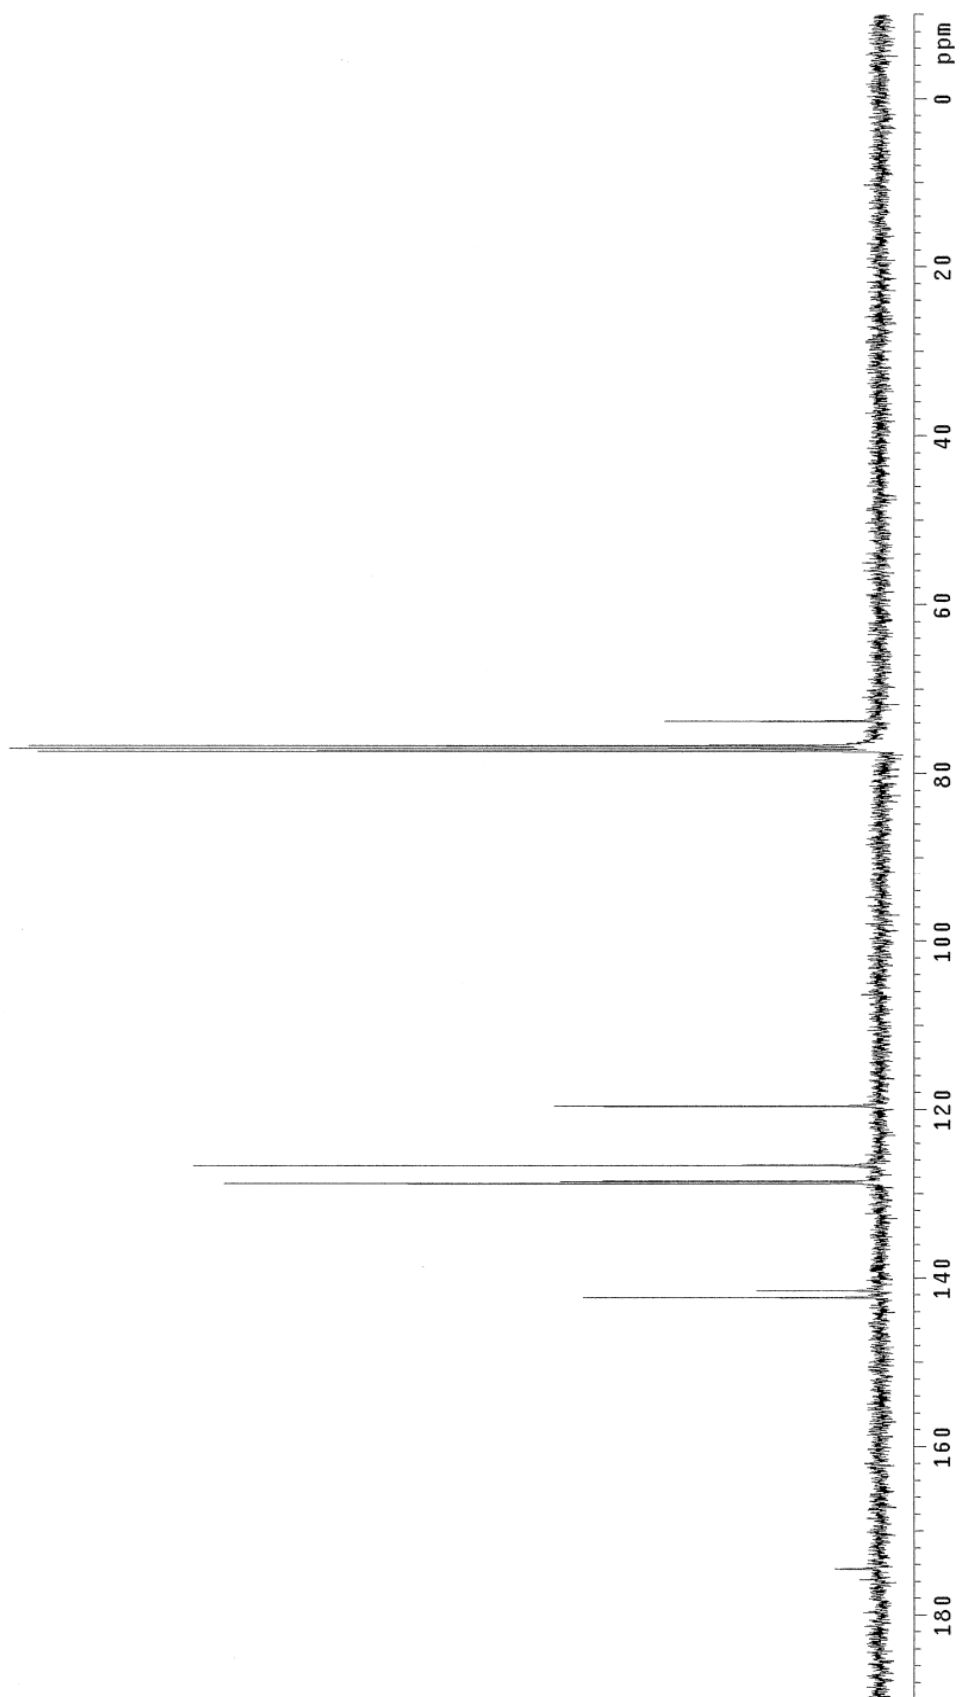

**b. General Procedure for the Coupling of Isoprene to Pyridyl Methanol 1a–1o:**

To a pressure tube equipped with magnetic stir bar was added pyridyl methanol **1a–1o** (0.300 mmol, 100 mol%), Ru<sub>3</sub>(CO)<sub>12</sub> (1.9 mg, 0.003 mmol, 1 mol%) and PCy<sub>3</sub> (4.2 mg, 0.015 mmol, 5 mol%). The tube was then sealed with a rubber septum, purged with argon. At this stage, PhMe (0.15 mL, 2.0 M concentration with respect to pyridyl methanol), and isoprene (60 μL, 0.600 mmol, 200 mol%) were added. The rubber septum was quickly replaced with a screw cap. The reaction was heated to 130 °C for the indicated time. The reaction mixture was concentrated *in vacuo* and the residue was subjected to flash column chromatography (SiO<sub>2</sub>) under the conditions noted to furnish prenylated pyridyl methanols.

**Phenyl Prenyl Methanol (3a).**

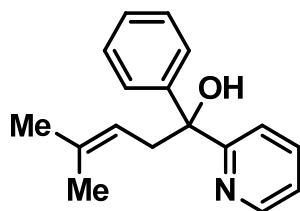

The reaction was performed in accordance with the general procedure. After 18 hours, the reaction mixture was concentrated *in vacuo* and the residue was purified by flash column chromatography (SiO<sub>2</sub>, 2.5% EtOAc/hexanes) to furnish the title compound (68.6 mg, 90% yield) as a yellow oil.

**<sup>1</sup>H NMR** (400 MHz, CDCl<sub>3</sub>): δ 8.51–8.49 (m, 1H), 7.62–7.58 (m, 1H), 7.56–7.53 (m, 2H), 7.36–7.28 (m, 3H), 7.23–7.18(m, 1H), 7.14–7.11 (m, 1H), 5.46 (d, *J* = 1.6 Hz, 1H), 5.10–5.06 (m, 1H), 3.03 (d, *J* = 7.2 Hz, 2H), 1.62 (s, 3H), 1.60 (s, 3H).

**<sup>13</sup>C NMR** (100 MHz, CDCl<sub>3</sub>): δ 177.9, 144.4, 142.5, 138.8, 128.3, 127.4, 125.5, 119.5, 117.7, 78.3, 41.9, 26.2, 18.4.

**LRMS** (CI) Calcd. for C<sub>17</sub>H<sub>20</sub>NO [M+H]<sup>+</sup>: 254, Found: 254.

**FTIR** (neat): 3351, 2969, 2913, 1590, 1571, 1468, 1446, 1432, 1376, 1293, 1189, 1152, 1109, 1090, 1065, 998, 886, 838, 789, 748, 698, 665 cm<sup>-1</sup>.



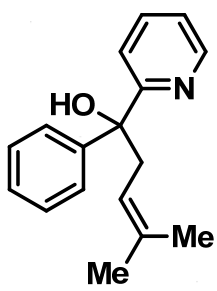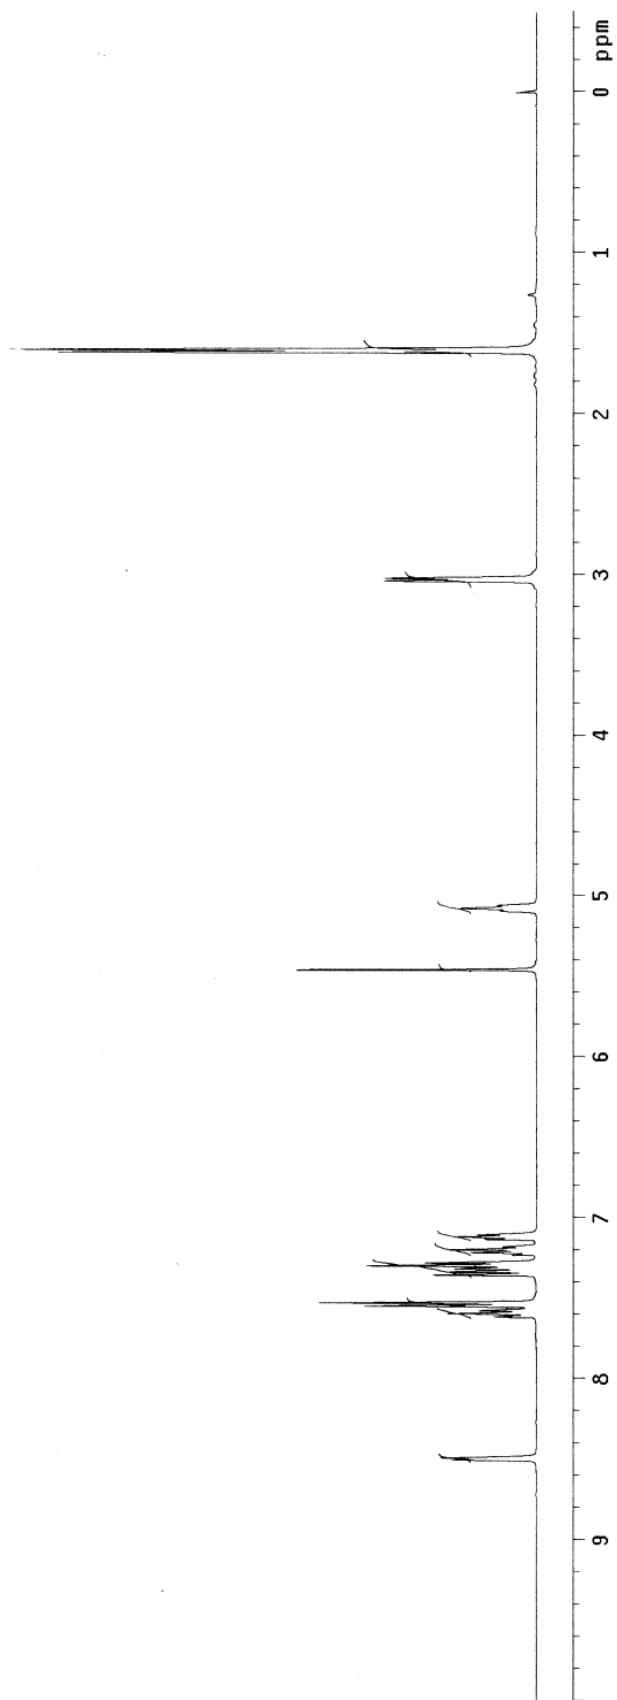

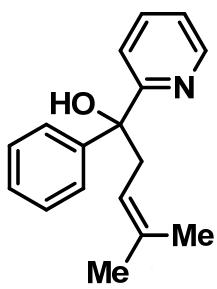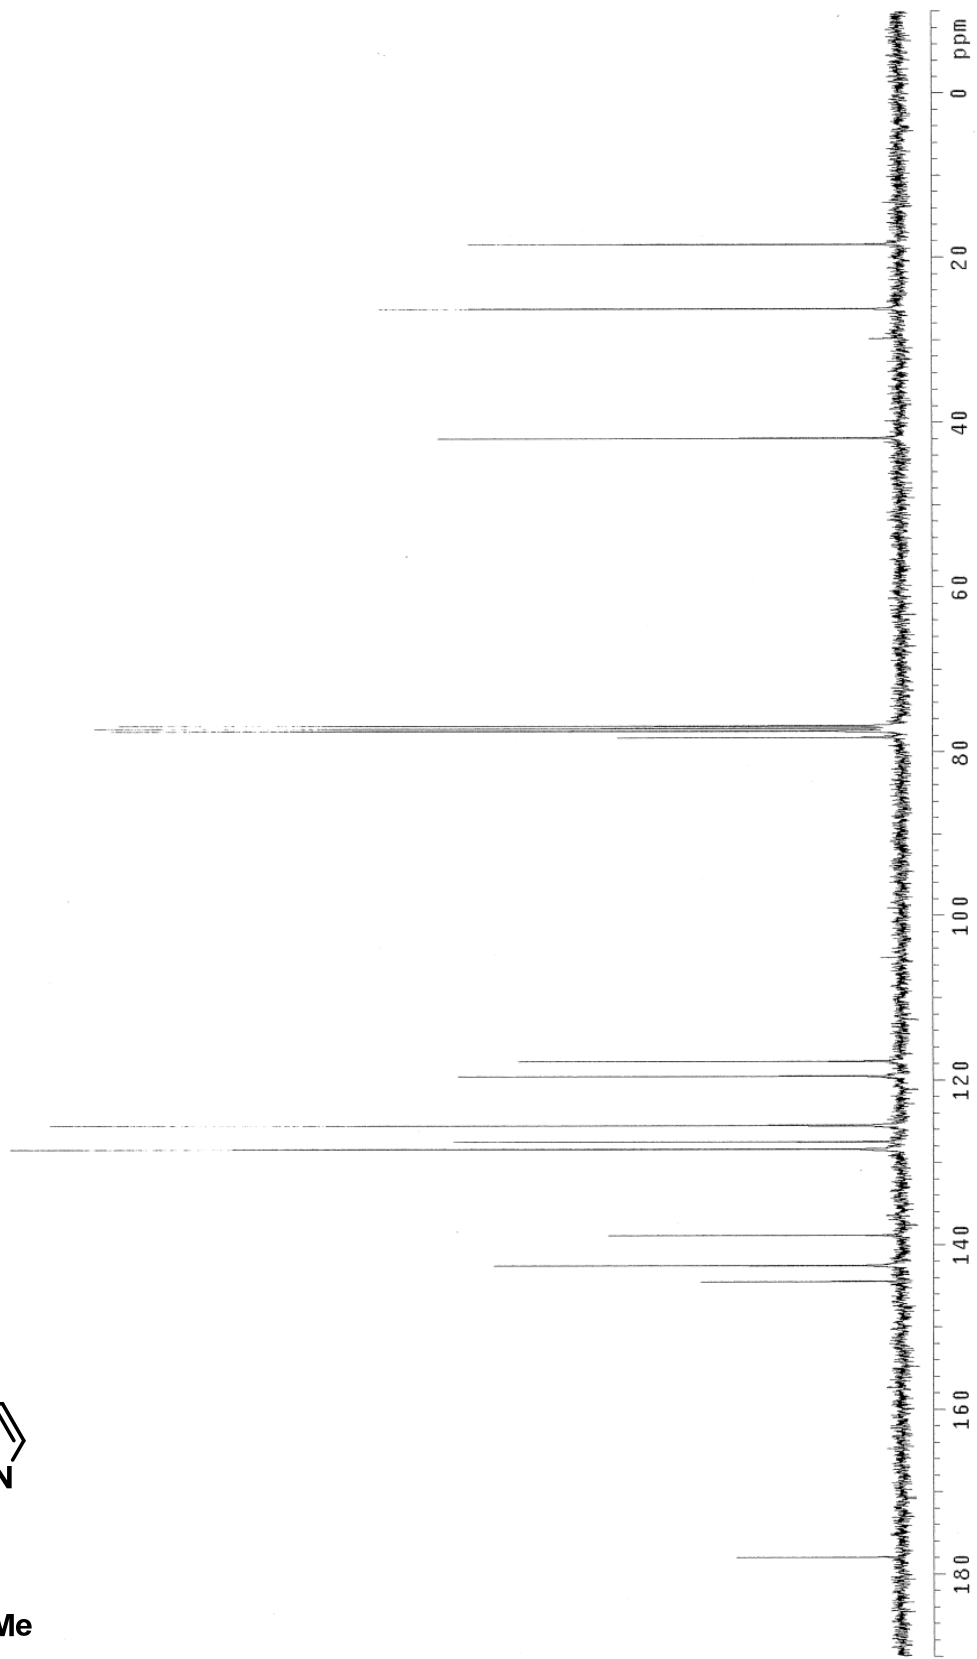

#### 4-Bromophenyl Pyridyl Prenyl Methanol (3b).

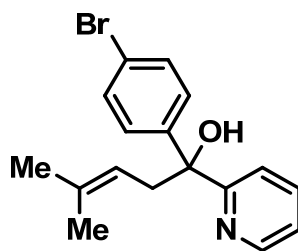

The reaction was performed in accordance with the general procedure. After 18 hours, the reaction mixture was concentrated *in vacuo* and the residue was subjected to flash column chromatography (SiO<sub>2</sub>, 2.5% EtOAc/hexanes) to furnish the title compound (91.7 mg, 92% yield) as a yellow oil.

**<sup>1</sup>H NMR** (400 MHz, CDCl<sub>3</sub>): δ 8.51–8.49 (m, 1H), 7.64–7.60 (m, 1H), 7.44–7.39 (m, 4H), 7.35–7.32 (m, 1H), 7.16–7.12 (m, 1H), 5.39 (s, 1H), 5.07–5.03 (m, 1H), 2.99 (dd, *J* = 6.8, 0.8 Hz, 2H), 1.62 (d, *J* = 1.6 Hz, 3H), 1.60 (s, 3H).

**<sup>13</sup>C NMR** (100 MHz, CDCl<sub>3</sub>): δ 163.3, 147.6, 145.4, 137.0, 135.4, 131.2, 128.1, 122.2, 121.0, 120.5, 118.7, 40.0, 26.0, 18.3.

**LRMS** (CI) Calcd. for C<sub>17</sub>H<sub>19</sub>BrNO [M+H]<sup>+</sup>: 332, Found: 332.

**FTIR** (neat): 3375, 2969, 2912, 1738, 1590, 1570, 1485, 1468, 1433, 1393, 1375, 1291, 1216, 1152, 1102, 1072, 1052, 1008, 936, 886, 820, 781, 749, 735, 716, 669 cm<sup>-1</sup>.

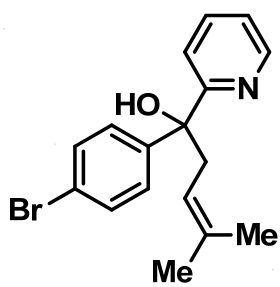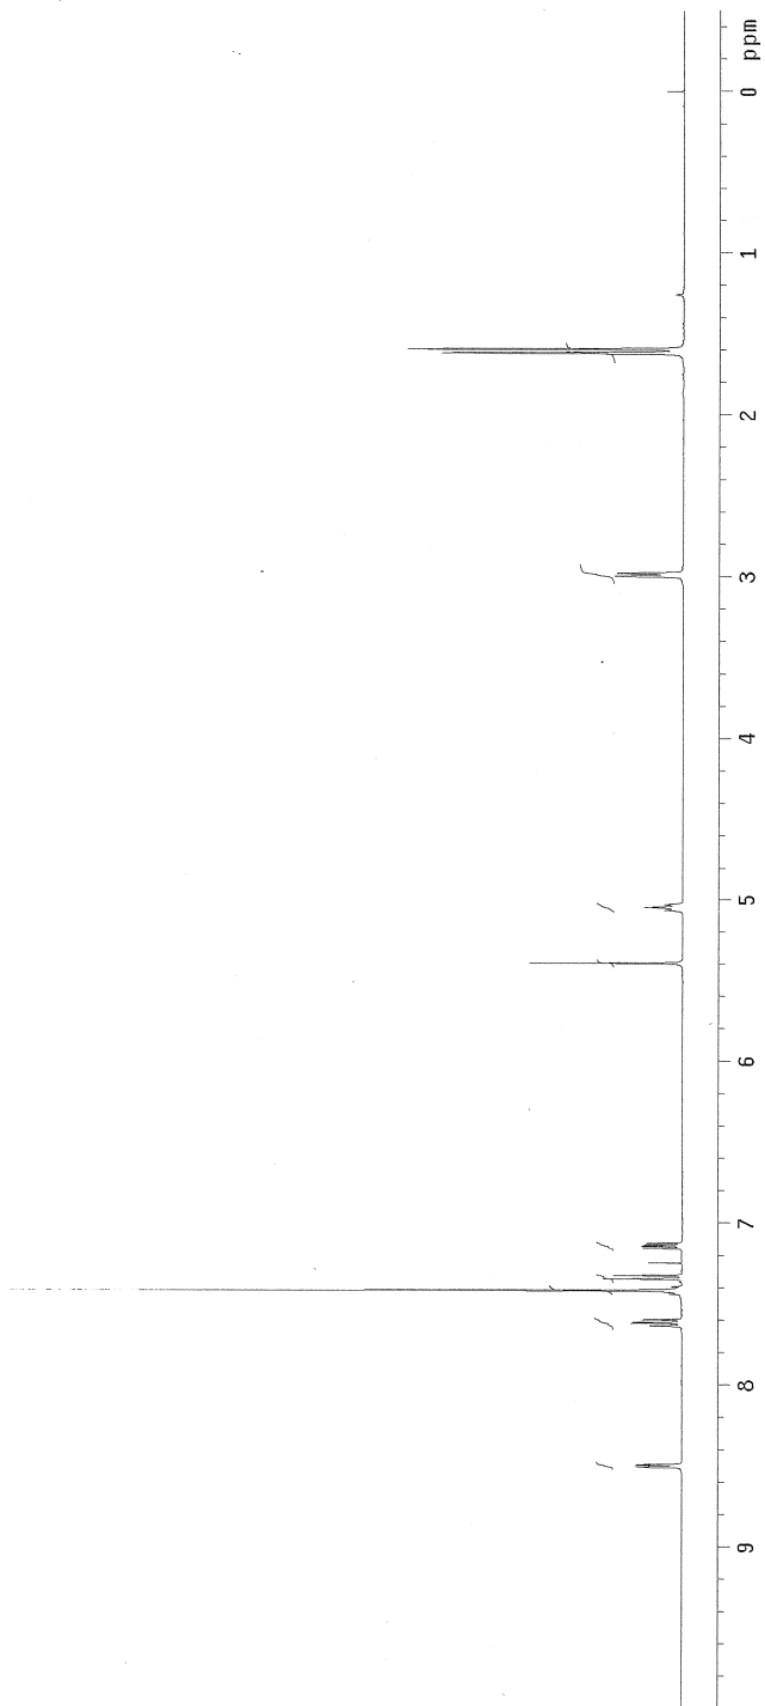

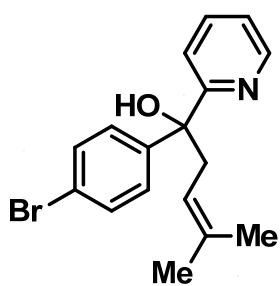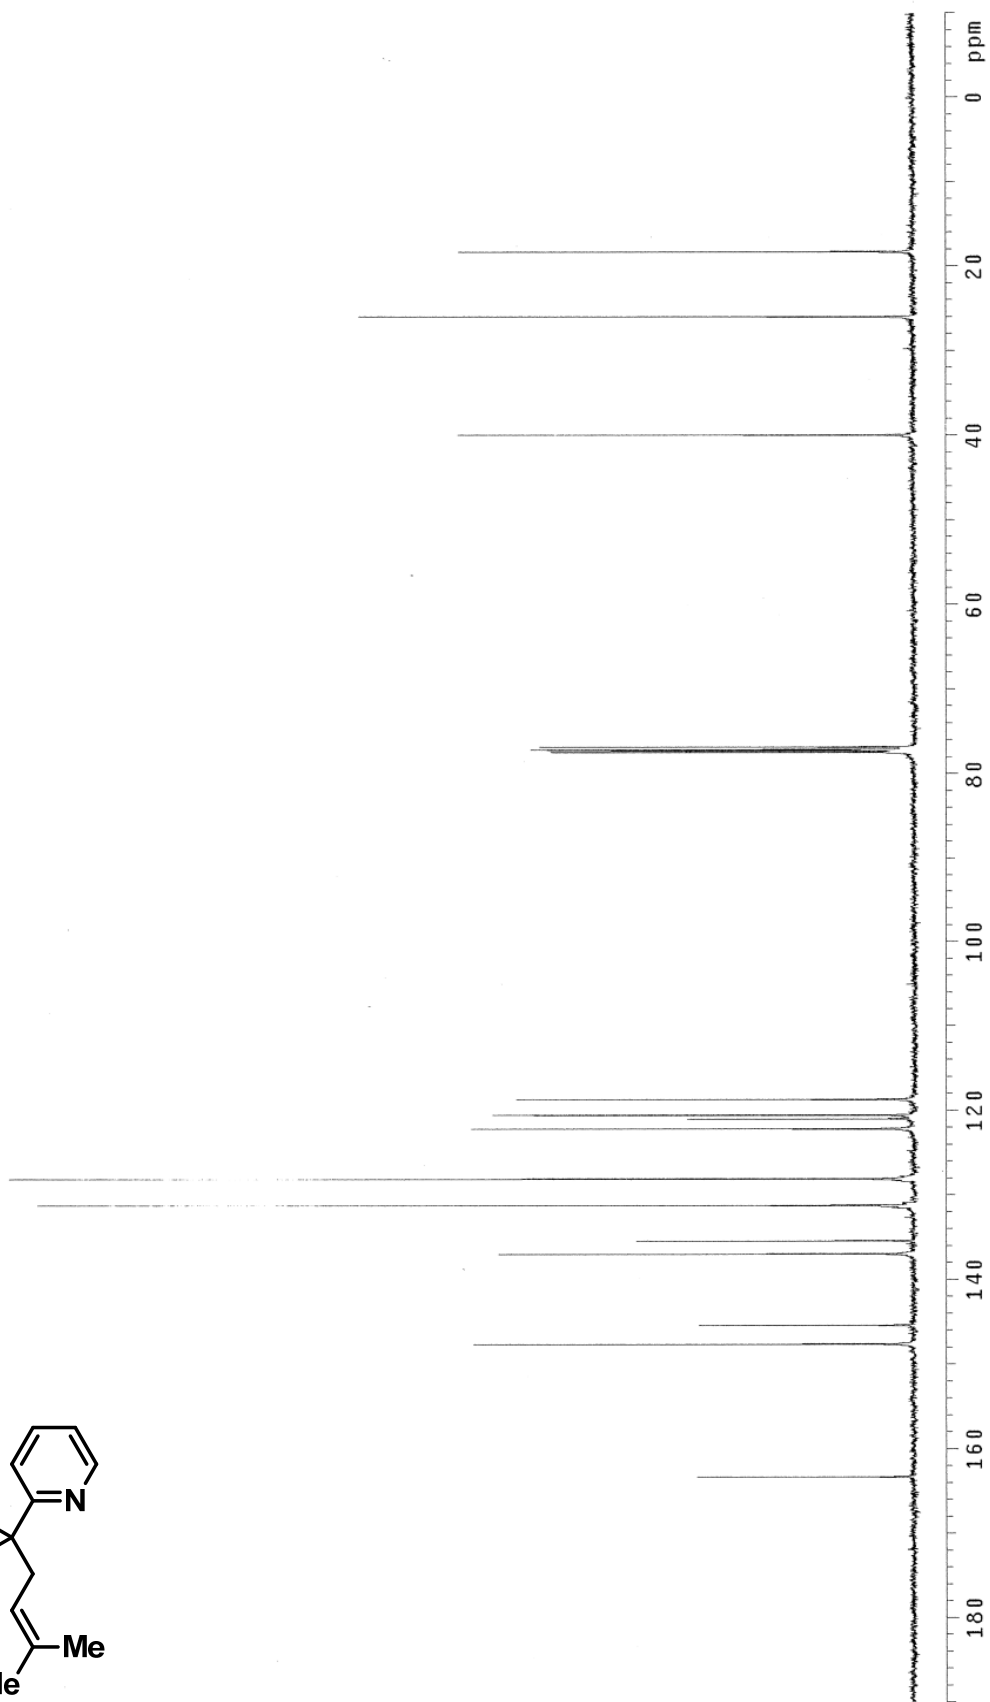

### 3-Bromophenyl Pyridyl Prenyl Methanol (3c).

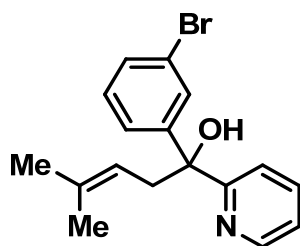

In a modification to the general procedure,  $\text{Ru}_3(\text{CO})_{12}$  (2 mol%) was employed. After 24 hours, the reaction mixture was concentrated *in vacuo* and the residue was subjected to flash column chromatography ( $\text{SiO}_2$ , 2.5% EtOAc/hexanes) to furnish the title compound (89.0 mg, 90% yield) as a yellow oil.

**$^1\text{H NMR}$**  (400 MHz,  $\text{CDCl}_3$ ):  $\delta$  8.53–8.51 (m, 1H), 7.71 (t,  $J = 2.0$  Hz, 1H), 7.65 (ddd,  $J = 8.0, 8.0, 2.0$  Hz, 1H), 7.48–7.45 (m, 1H), 7.37–7.32 (m, 2H), 7.19–7.15 (m, 2H), 5.42 (s, 1H), 5.06–5.02 (m, 1H), 2.99 (d,  $J = 6.8$  Hz, 2H), 1.63 (d,  $J = 1.2$  Hz, 3H), 1.61 (s, 3H).

**$^{13}\text{C NMR}$**  (100 MHz,  $\text{CDCl}_3$ ):  $\delta$  163.1, 148.8, 147.7, 137.1, 135.6, 130.1, 129.8, 129.5, 124.9, 122.6, 122.3, 120.7, 118.6, 40.0, 26.0, 18.4.

**$\text{LRMS}$**  (CI) Calcd. for  $\text{C}_{17}\text{H}_{19}\text{BrNO}$   $[\text{M}+\text{H}]^+$ : 332, Found: 332.

**$\text{FTIR}$**  (neat): 3352, 2970, 2913, 2355, 1738, 1588, 1568, 1467, 1433, 1416, 1375, 1294, 1169, 1112, 1096, 1072, 1052, 996, 892, 839, 792, 775, 749, 697, 683, 657  $\text{cm}^{-1}$ .

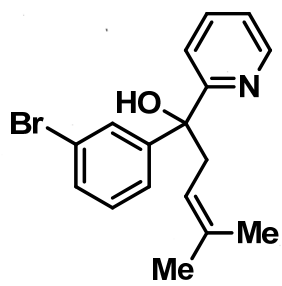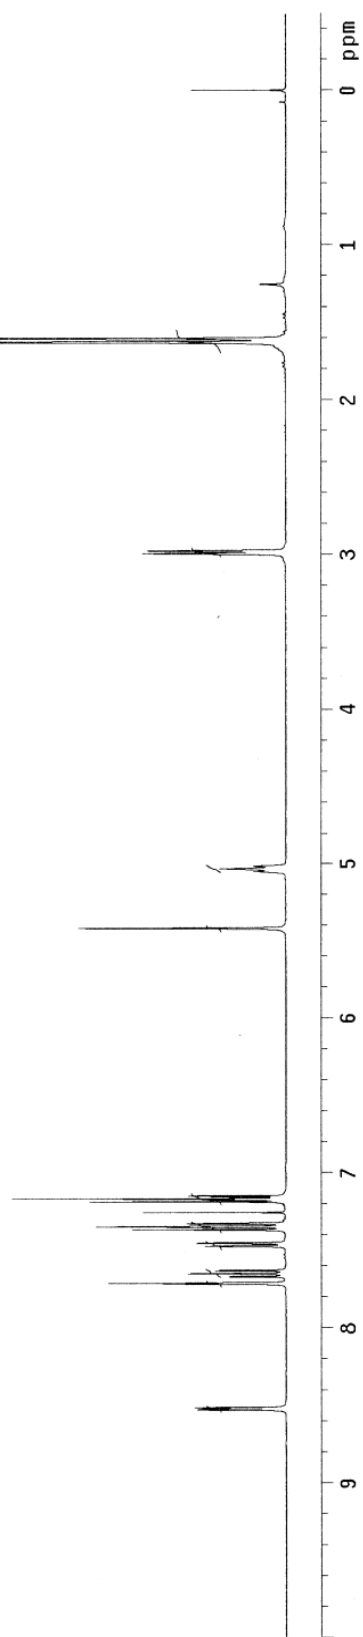

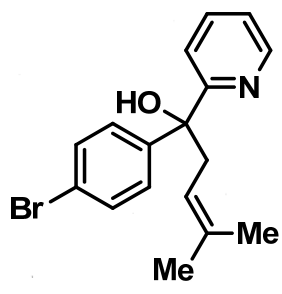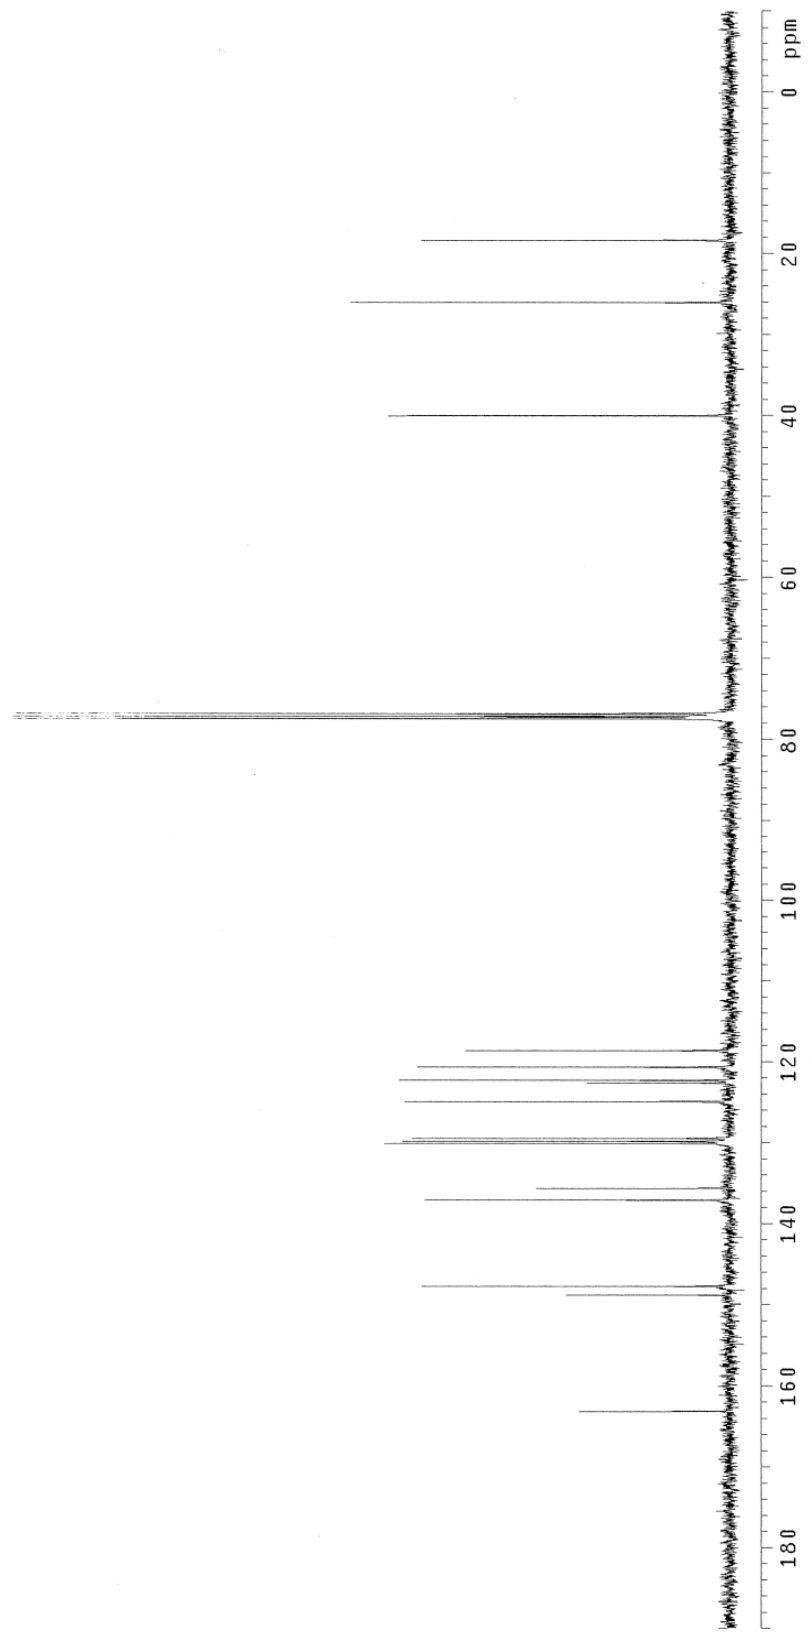



**4-Cyanophenyl Pyridyl Prenyl Methanol (3d).**

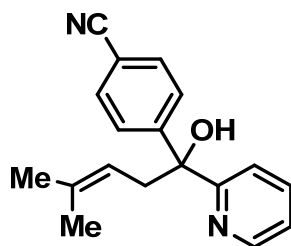

The reaction was performed in accordance with the general procedure. After 18 hours, the reaction mixture was concentrated *in vacuo* and the residue was subjected to flash column chromatography (SiO<sub>2</sub>, 2.5% EtOAc/hexanes) to furnish the title compound (83.0 mg, 99% yield) as a yellow oil.

**<sup>1</sup>H NMR** (400 MHz, CDCl<sub>3</sub>): δ 8.55–8.53 (m, 1H), 7.70–7.65 (m, 3H), 7.61–7.58 (m, 2H), 7.38 (dt, *J* = 8.0 Hz, 1.2 Hz, 1H), 7.20 (ddd, *J* = 7.2, 4.8, 1.2 Hz, 1H), 5.31 (s, 1H), 5.03–4.99 (m, 1H), 3.01 (d, *J* = 7.2 Hz, 2H), 1.63 (d, *J* = 0.8 Hz, 3H), 1.61 (s, 3H).

**<sup>13</sup>C NMR** (100 MHz, CDCl<sub>3</sub>): δ 162.4, 151.5, 147.7, 137.0, 135.9, 131.9, 126.8, 122.3, 120.3, 118.8, 118.0, 110.5, 39.7, 25.8, 18.1.

**LRMS** (CI) Calcd. for C<sub>18</sub>H<sub>19</sub>N<sub>2</sub>O [M+H]<sup>+</sup>: 279, Found: 279.

**FTIR** (neat): 2915, 2227, 1606, 1589, 1573, 1504, 1469, 1454, 1434, 1403, 1384, 1292, 1191, 1153, 1105, 1079, 1052, 996, 888, 832, 787, 751, 710, 685 cm<sup>-1</sup>.

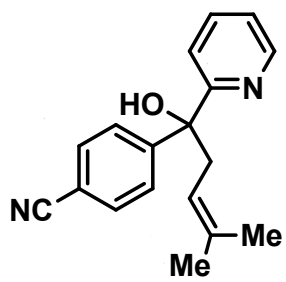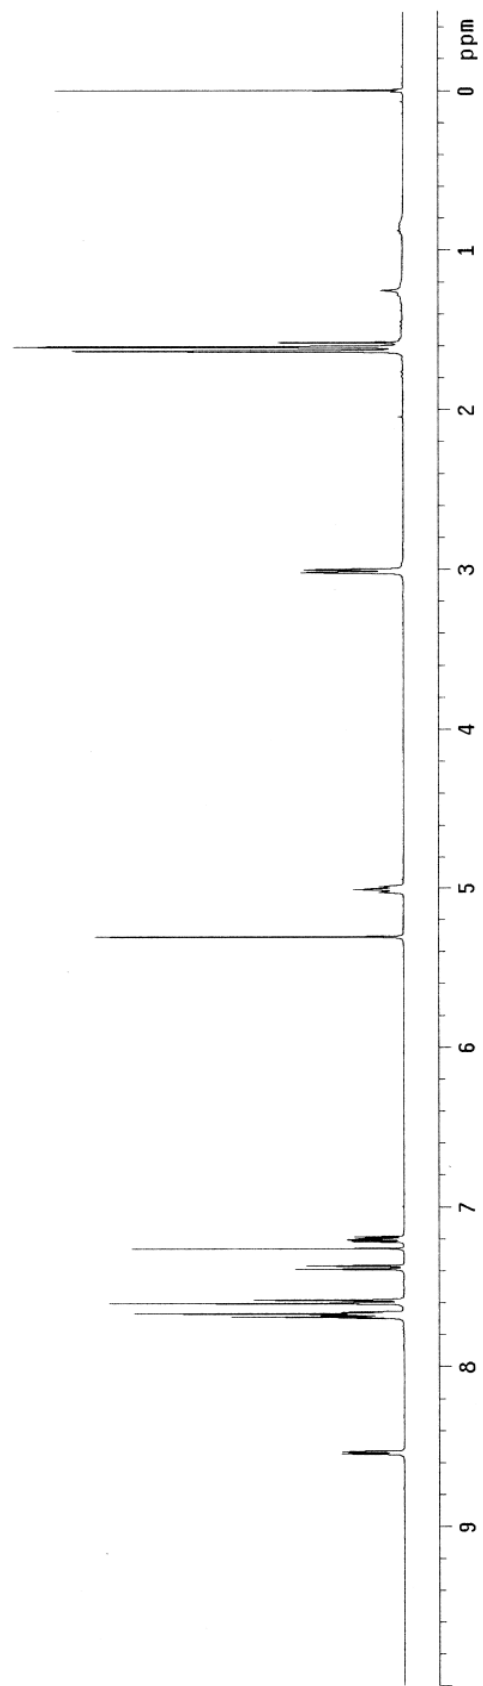

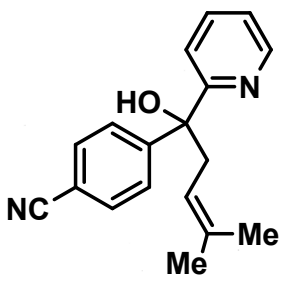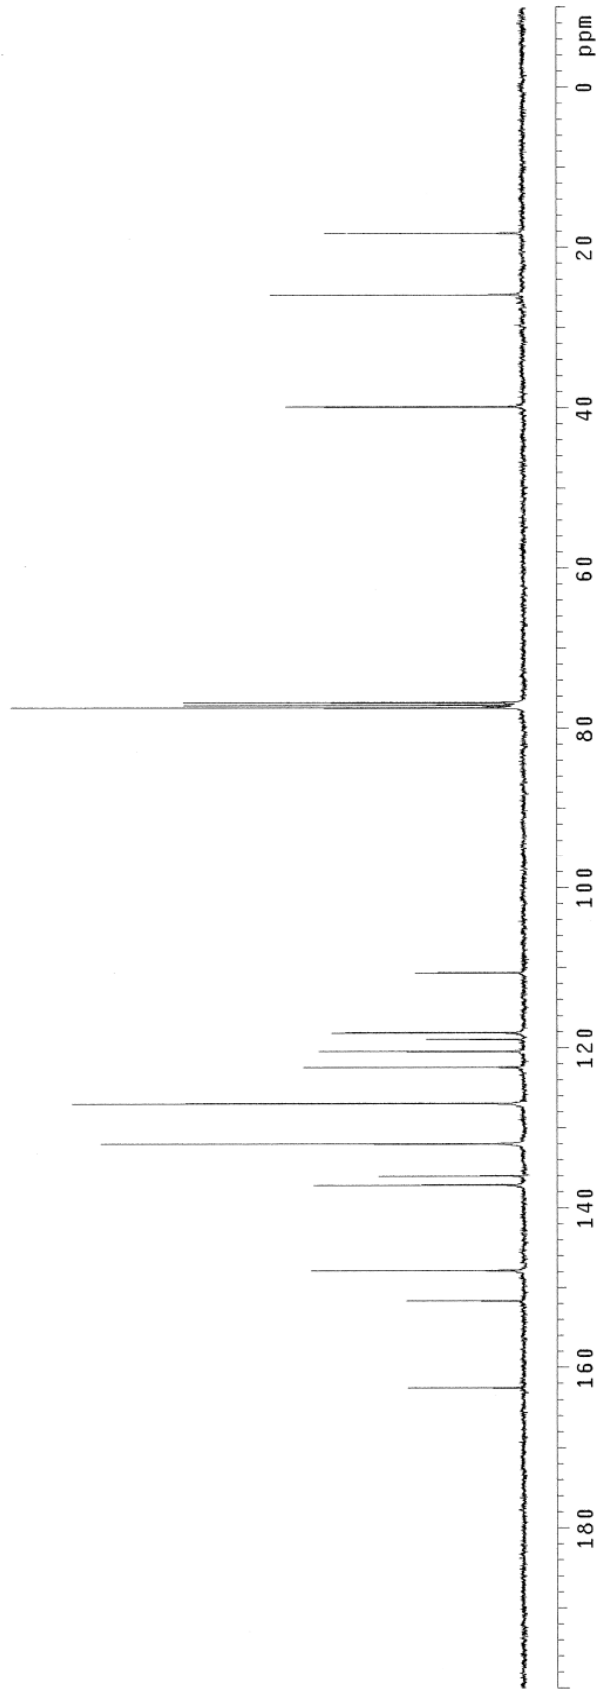

#### 4-Trifluoromethylphenyl Pyridyl Prenyl Methanol (3e).

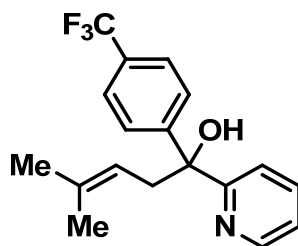

The reaction was performed in accordance with the general procedure. After 18 hours, the reaction mixture was concentrated *in vacuo* and the residue was purified flash column chromatography (SiO<sub>2</sub>, 2.5% EtOAc/hexanes) to furnish the title compound (91.1 mg, 95% yield) as a yellow oil.

**<sup>1</sup>H NMR** (400 MHz, CDCl<sub>3</sub>): δ 8.55–8.53 (m, 1H), 7.69–7.65 (m, 3H), 7.56 (d, *J* = 8.8 Hz, 2H), 7.39–7.37 (m, 1H), 7.21–7.17 (m, 1H), 5.37 (s, 1H), 5.06–5.02 (m, 1H), 3.03 (dd, *J* = 6.8, 1.2 Hz, 2H), 1.64 (d, *J* = 0.8 Hz, 3H), 1.61 (s, 3H).

**<sup>13</sup>C NMR** (100 MHz, CDCl<sub>3</sub>): 163.0, 150.2, 147.7, 137.0, 135.7, 129.0 (q, *J* = 32 Hz), 126.5, 125.1, 125.1, 124.2 (d, *J* = 270.8 Hz), 122.9, 122.2, 120.5, 118.4, 39.9, 25.9, 18.2.

**<sup>19</sup>F NMR** (376 MHz, CDCl<sub>3</sub>): δ -62.4.

**LRMS** (CI) Calcd. for C<sub>18</sub>H<sub>19</sub>F<sub>3</sub>NO [M+H]<sup>+</sup>: 322, Found: 322.

**FTIR** (neat): 3377, 2917, 1618, 1590, 1572, 1468, 1434, 1409, 1324, 1163, 1120, 1067, 1017, 999, 887, 835, 787, 751, 724, 670 cm<sup>-1</sup>.

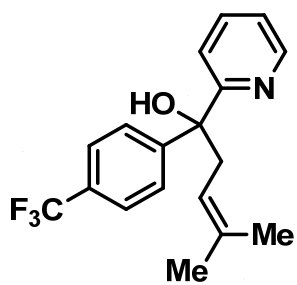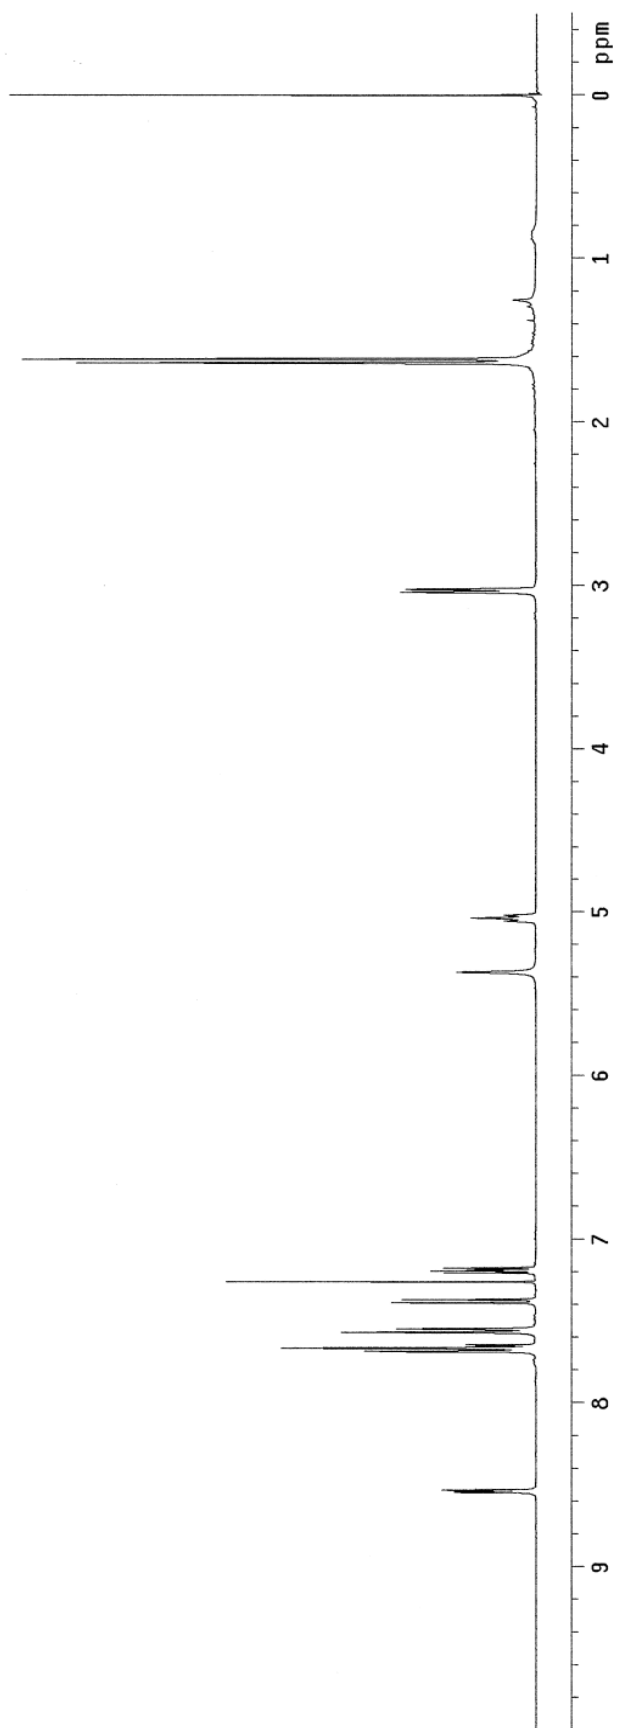

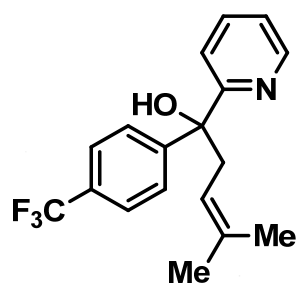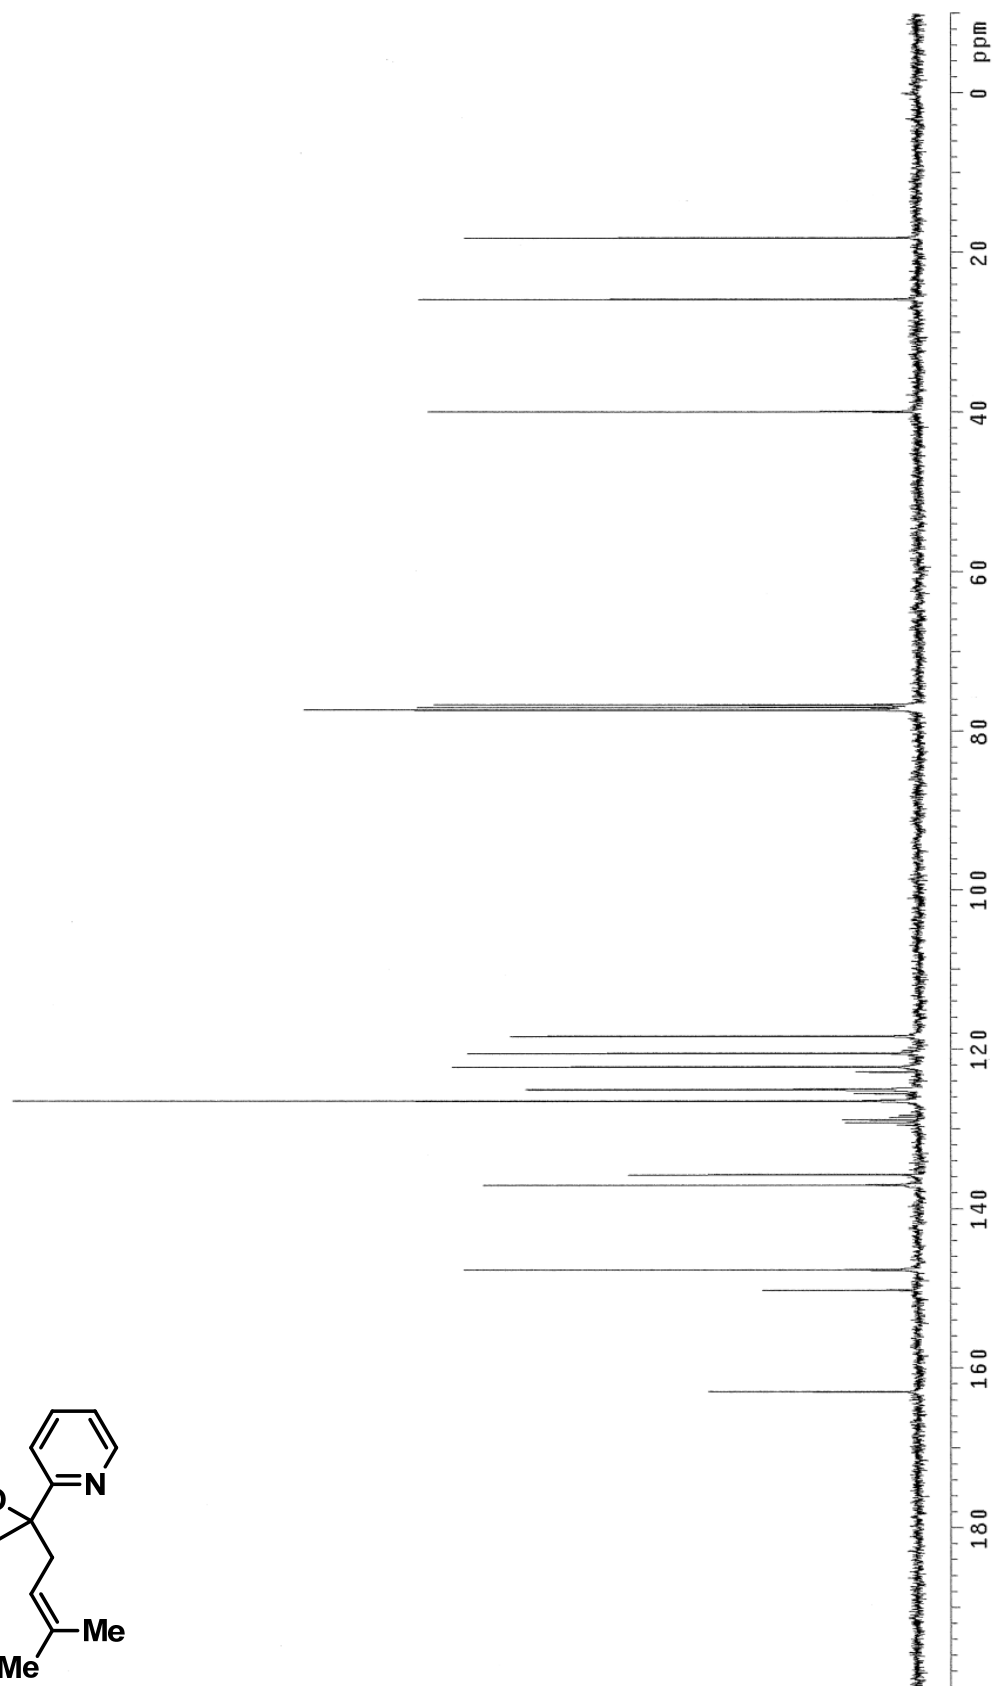

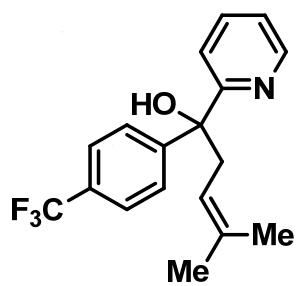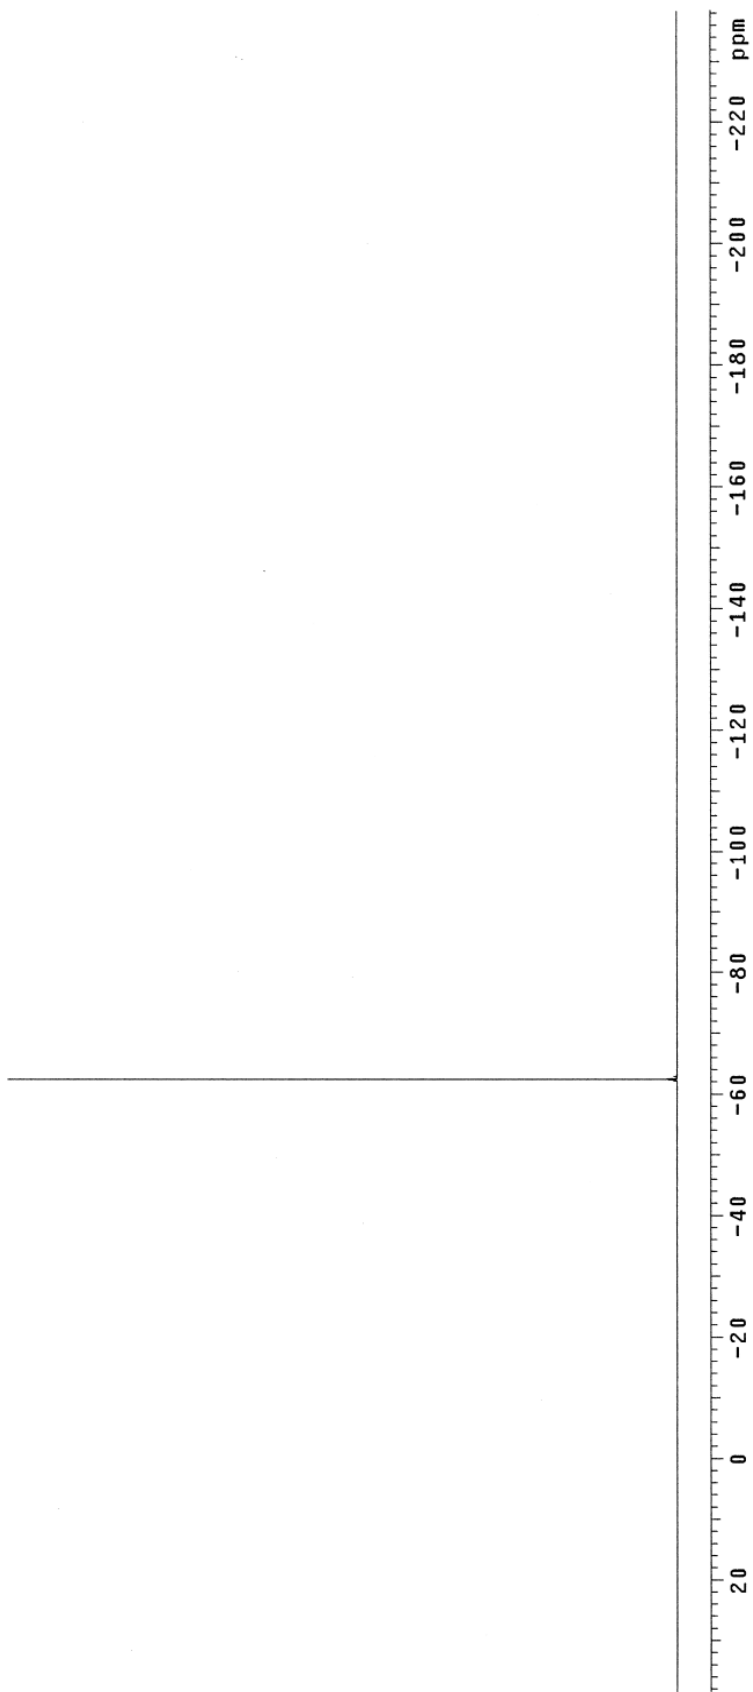

#### 4-Methoxyphenyl Pyridyl Prenyl Methanol (3f).

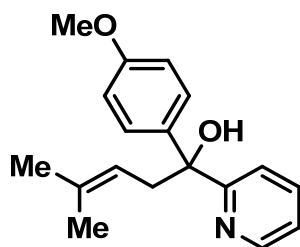

In a modification to the general procedure,  $\text{Ru}_3(\text{CO})_{12}$  (2 mol%) was employed. After 24 hours, the reaction mixture was concentrated *in vacuo* and the residue was subjected to flash column chromatography ( $\text{SiO}_2$ , 5% EtOAc/hexanes) to furnish the title compound (76.2 mg, 90% yield) as a yellow oil.

**$^1\text{H NMR}$**  (400 MHz,  $\text{CDCl}_3$ ):  $\delta$  8.50–8.48 (m, 1H), 7.60 (ddd,  $J = 7.6, 7.6, 1.6$  Hz, 1H), 7.46–7.42 (m, 2H), 7.32 (dt,  $J = 8.0, 0.8$  Hz, 1H), 7.12 (ddd,  $J = 7.6, 4.8, 0.8$  Hz, 1H), 6.85–6.82 (m, 2H), 5.43 (s, 1H), 5.10–5.06 (m, 1H), 3.75 (s, 3H), 3.01–2.99 (m, 2H), 1.62 (d,  $J = 1.2$  Hz, 3H), 1.59 (s, 3H).

**$^{13}\text{C NMR}$**  (100 MHz,  $\text{CDCl}_3$ ):  $\delta$  164.2, 158.5, 147.4, 138.5, 136.8, 134.8, 127.4, 121.9, 120.7, 119.2, 113.5, 55.2, 40.1, 26.0, 18.3.

**LRMS** (CI) Calcd. for  $\text{C}_{18}\text{H}_{22}\text{NO}_2$   $[\text{M}+\text{H}]^+$ : 284, Found: 284.

**FTIR** (neat): 3376, 2910, 2835, 1737, 1609, 1590, 1570, 1509, 1465, 1433, 1375, 1301, 1247, 1177, 1105, 1076, 1034, 998, 940, 887, 829, 797, 783,  $750\text{ cm}^{-1}$ .



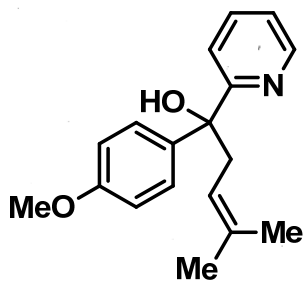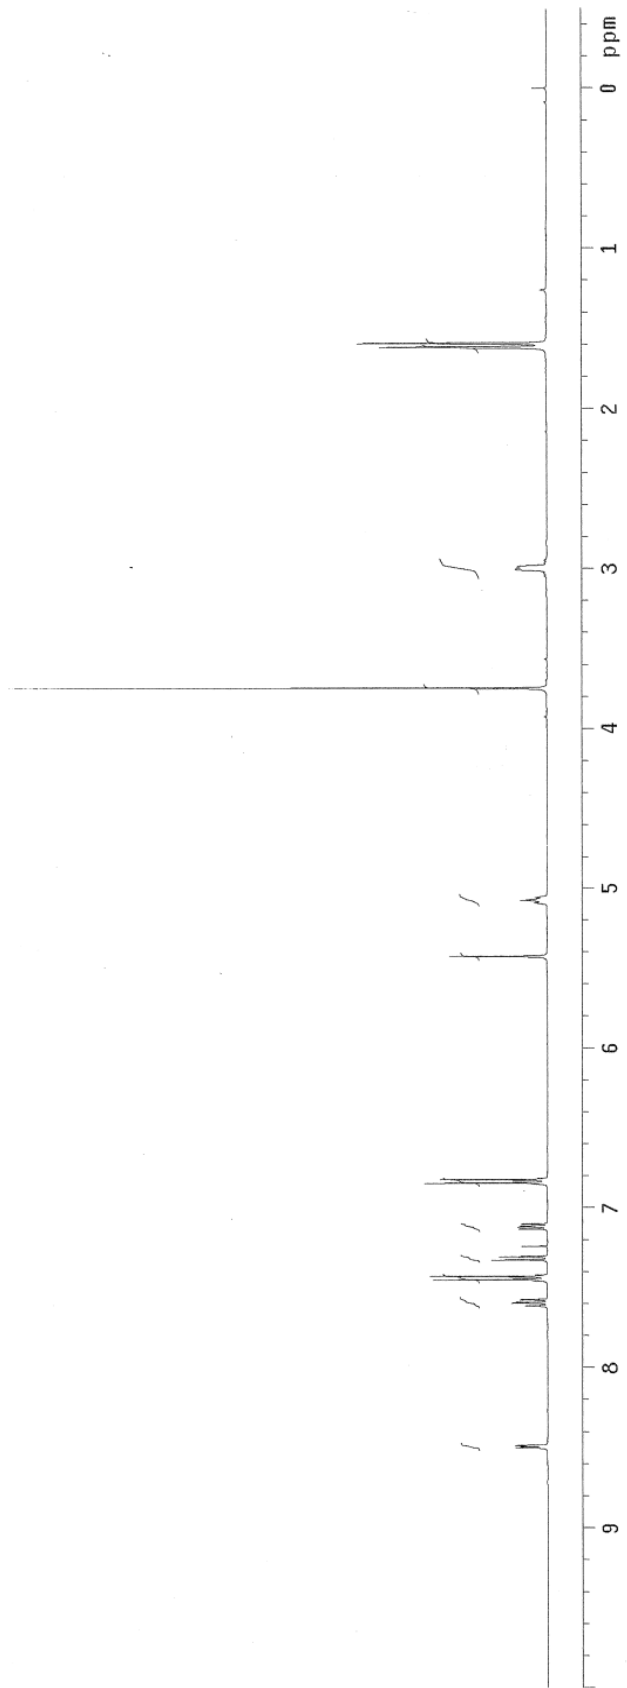

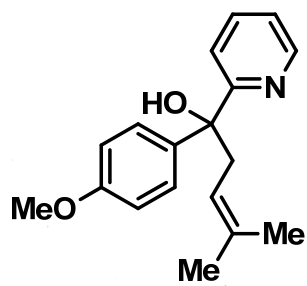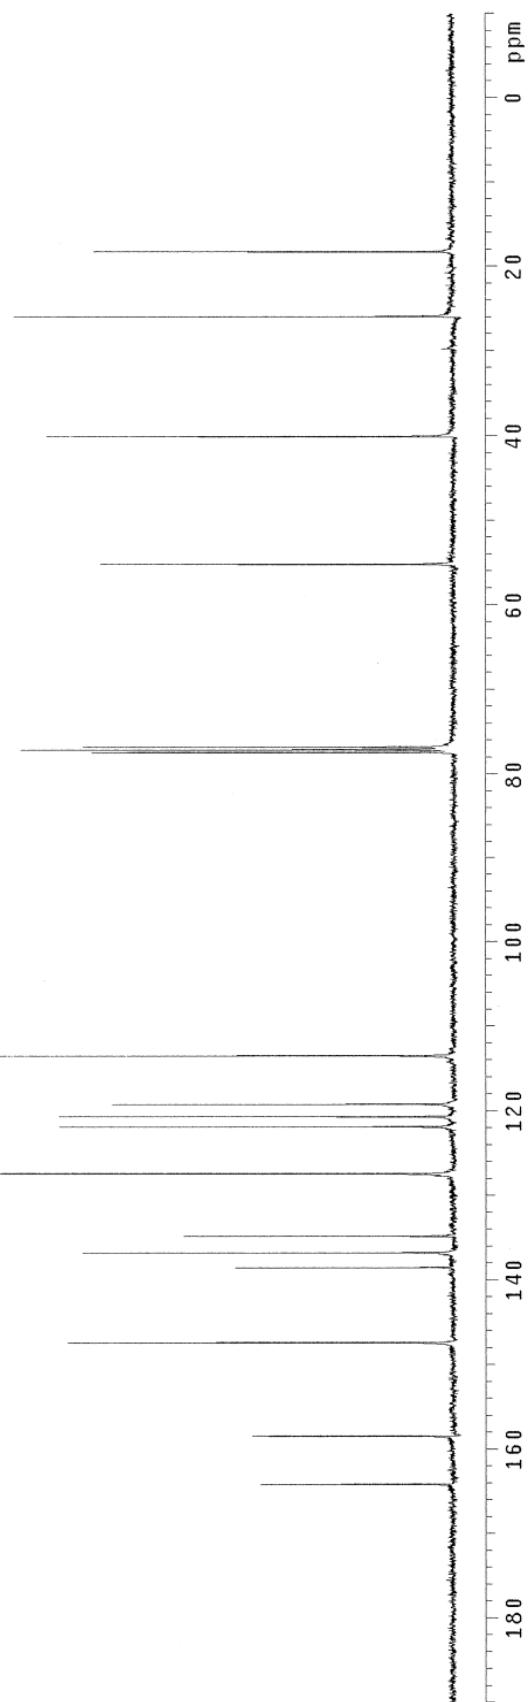

**1,3-Benzodioxole Prenyl Methanol (3g).**

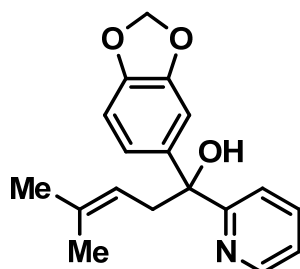

The reaction was performed in accordance with the general procedure. After 18 hours, the reaction mixture was concentrated *in vacuo* and the residue was subjected to flash column chromatography (SiO<sub>2</sub>, 2.5% EtOAc/hexanes) to furnish the title compound (76.0 mg, 85% yield) as a yellow oil.

**<sup>1</sup>H NMR** (400 MHz, CDCl<sub>3</sub>): δ 8.51–8.49 (m, 1H), 7.61 (ddd, *J* = 7.6, 7.6, 1.6 Hz, 1H), 7.34–7.32 (m, 1H), 7.13 (ddd, *J* = 7.6, 4.8, 0.8 Hz, 1H), 7.02–6.99 (m, 2H), 6.74 (d, *J* = 8.4 Hz, 1H), 5.89–5.88 (m, 2H), 5.41 (s, 1H), 5.09–5.05 (m, 1H), 2.97 (d, *J* = 6.8 Hz, 2H), 1.62 (d, *J* = 0.8 Hz, 3H), 1.60 (s, 3H).

**<sup>13</sup>C NMR** (100 MHz, CDCl<sub>3</sub>): δ 163.9, 147.6, 147.5, 146.4, 140.6, 136.8, 135.0, 122.0, 120.6, 119.3, 119.0, 107.8, 107.3, 111.0, 40.1, 26.0, 18.3.

**LRMS** (CI) Calcd. for C<sub>18</sub>H<sub>20</sub>NO<sub>3</sub> [M+H]<sup>+</sup>: 298, Found: 298.

**FTIR** (neat): 3373, 2912, 1742, 1590, 1570, 1502, 1486, 1468, 1433, 1376, 1293, 1235, 1152, 1106, 1078, 1038, 998, 935, 912, 865, 812, 782, 750, 735, 715, 678 cm<sup>-1</sup>.

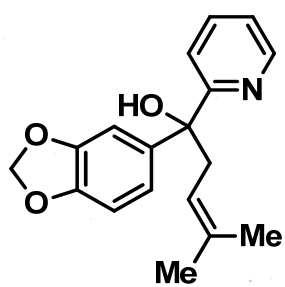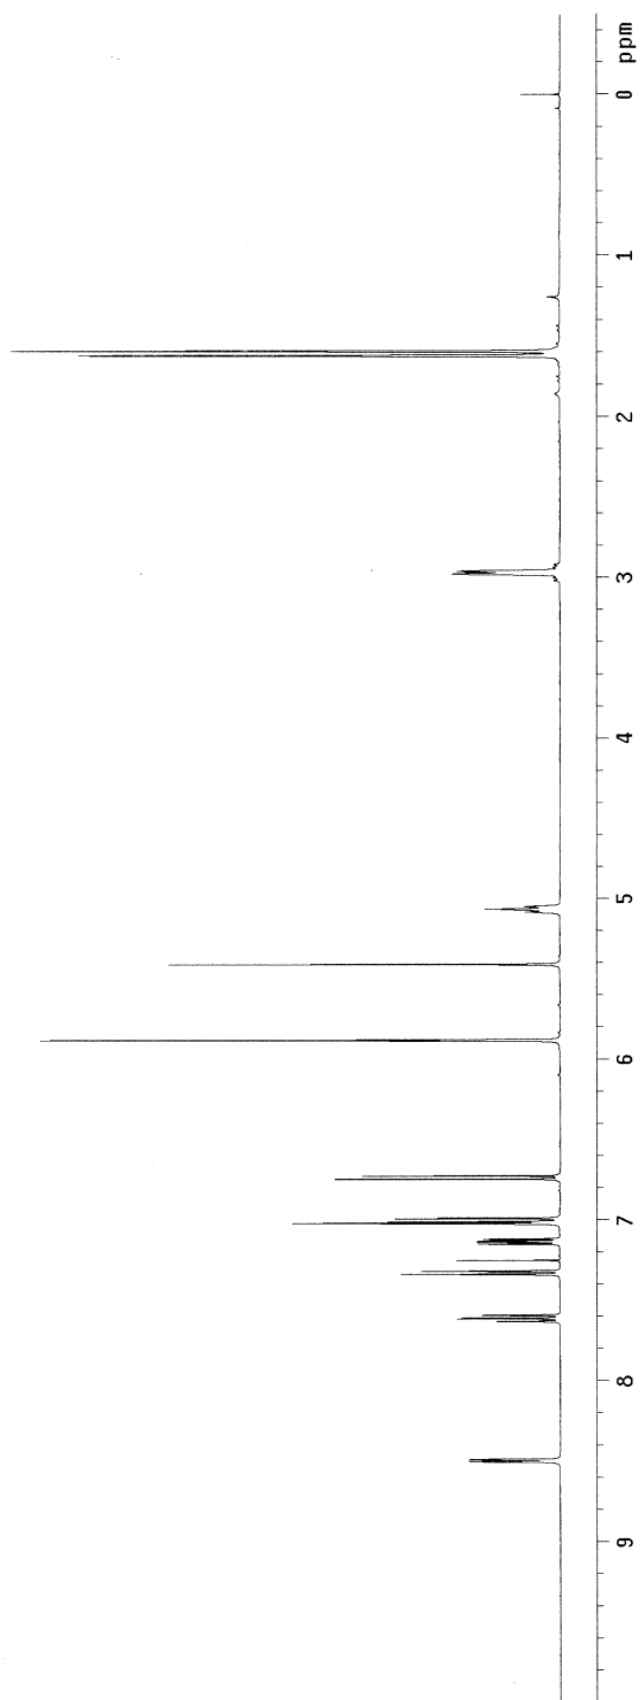

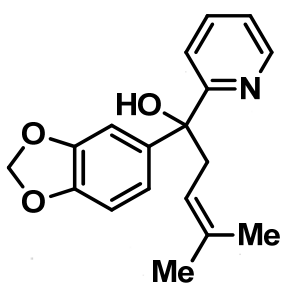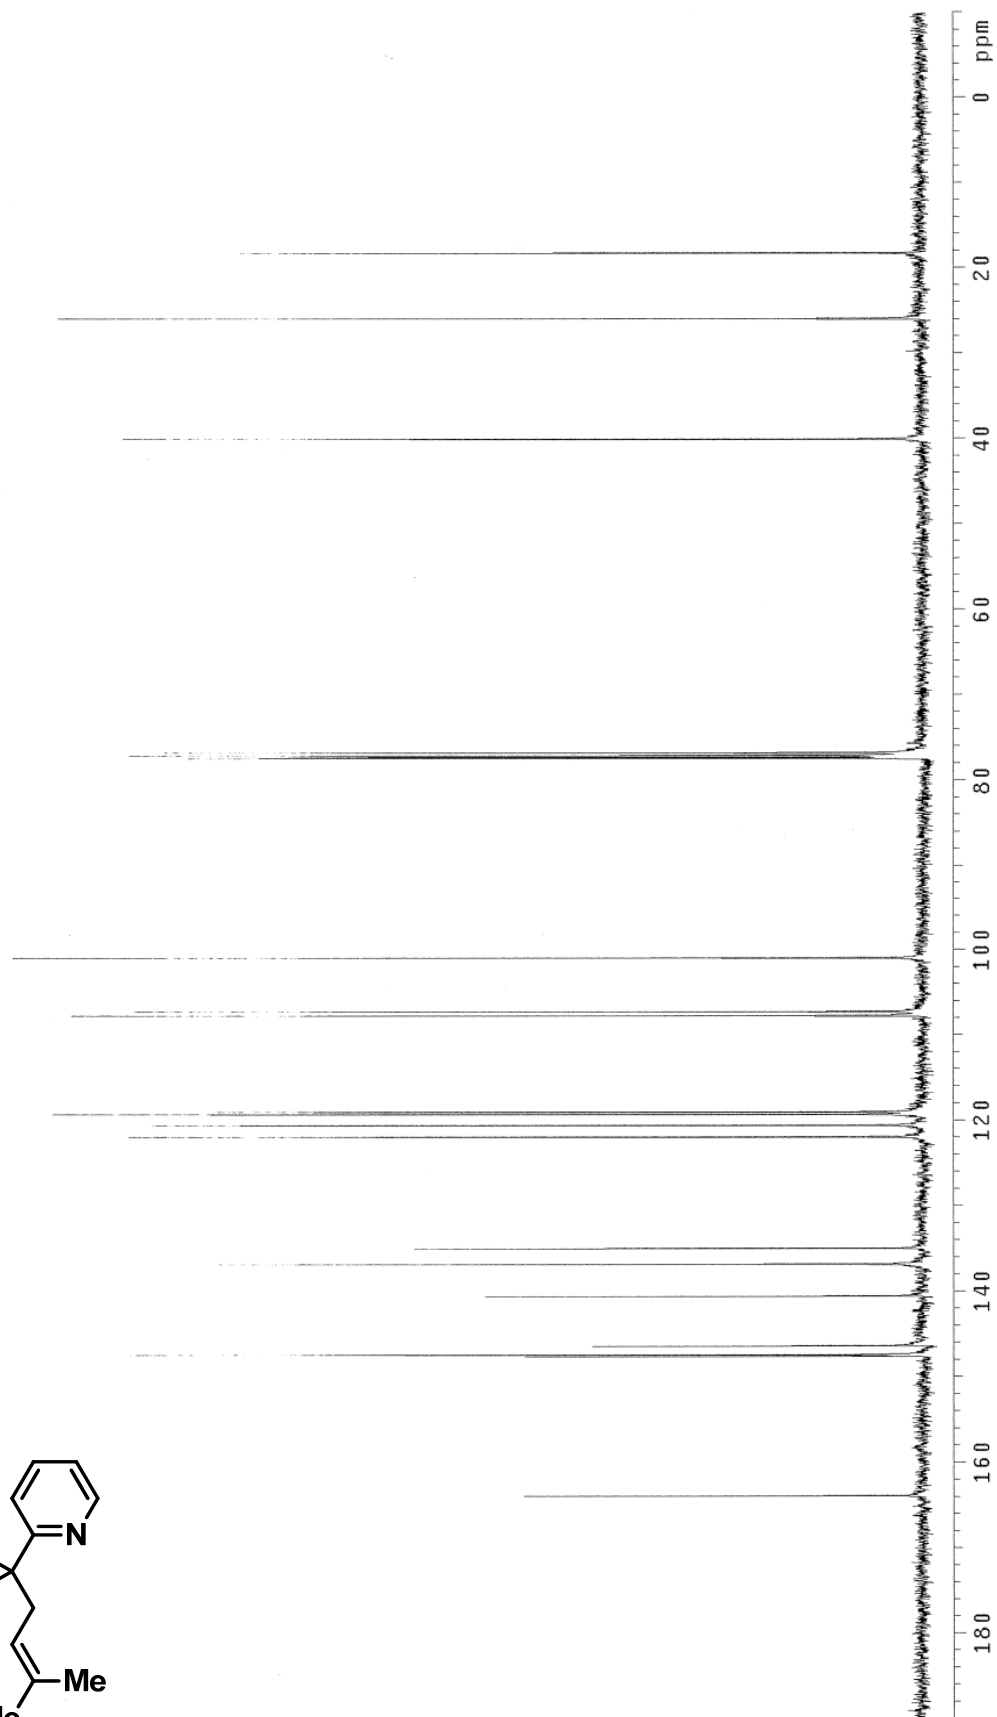

**2-(*N*-Bn-indolyl) Pyridyl Prenyl Methanol (3h).**

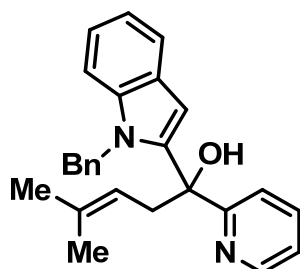

In a modification to the general procedure,  $\text{Ru}_3(\text{CO})_{12}$  (2 mol%) was employed. After 24 hours, the reaction mixture was concentrated *in vacuo* and the residue was subjected to flash column chromatography ( $\text{SiO}_2$ , 10% EtOAc/hexanes) to furnish the title compound (71.3 mg, 62% yield) as a yellow oil.

**$^1\text{H NMR}$**  (400 MHz,  $\text{CDCl}_3$ ): 8.56–8.55 (m, 1H), 7.54 (td,  $J = 8.0, 2.0$  Hz, 1H), 7.43 (d,  $J = 8.0$  Hz, 1H), 7.30–7.17 (m, 6H), 7.14–7.05 (m, 4H), 6.96–6.92 (m, 1H), 5.59 (s, 1H), 5.27 (s, 2H), 5.18–5.14 (m, 1H), 3.15 (dd,  $J = 14.8, 6.8$  Hz, 1H), 2.99 (dd,  $J = 14.8, 6.8$  Hz, 1H), 1.61 (s, 3H), 1.53 (s, 3H).

**$^{13}\text{C NMR}$**  (100 MHz,  $\text{CDCl}_3$ ):  $\delta$  164.1, 147.2, 137.6, 137.3, 136.7, 134.4, 128.8, 127.7, 126.9, 126.6, 126.4, 121.9, 121.8, 121.4, 121.0, 120.8, 119.4, 109.7, 75.4, 50.1, 40.7, 26.0, 18.2.

**LRMS** (CI) Calcd. for  $\text{C}_{26}\text{H}_{27}\text{N}_2\text{O}$   $[\text{M}+\text{H}]^+$ : 383, Found: 383.

**FTIR** (neat): 3371, 2914, 1738, 1591, 1569, 1548, 1496, 1466, 1453, 1433, 1355, 1331, 1293, 1217, 1178, 1106, 1049, 1028, 1016, 998, 908, 872, 787, 733, 696  $\text{cm}^{-1}$ .

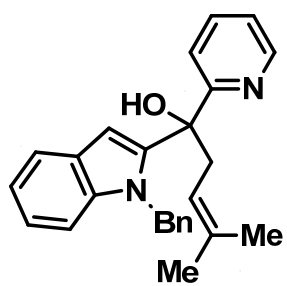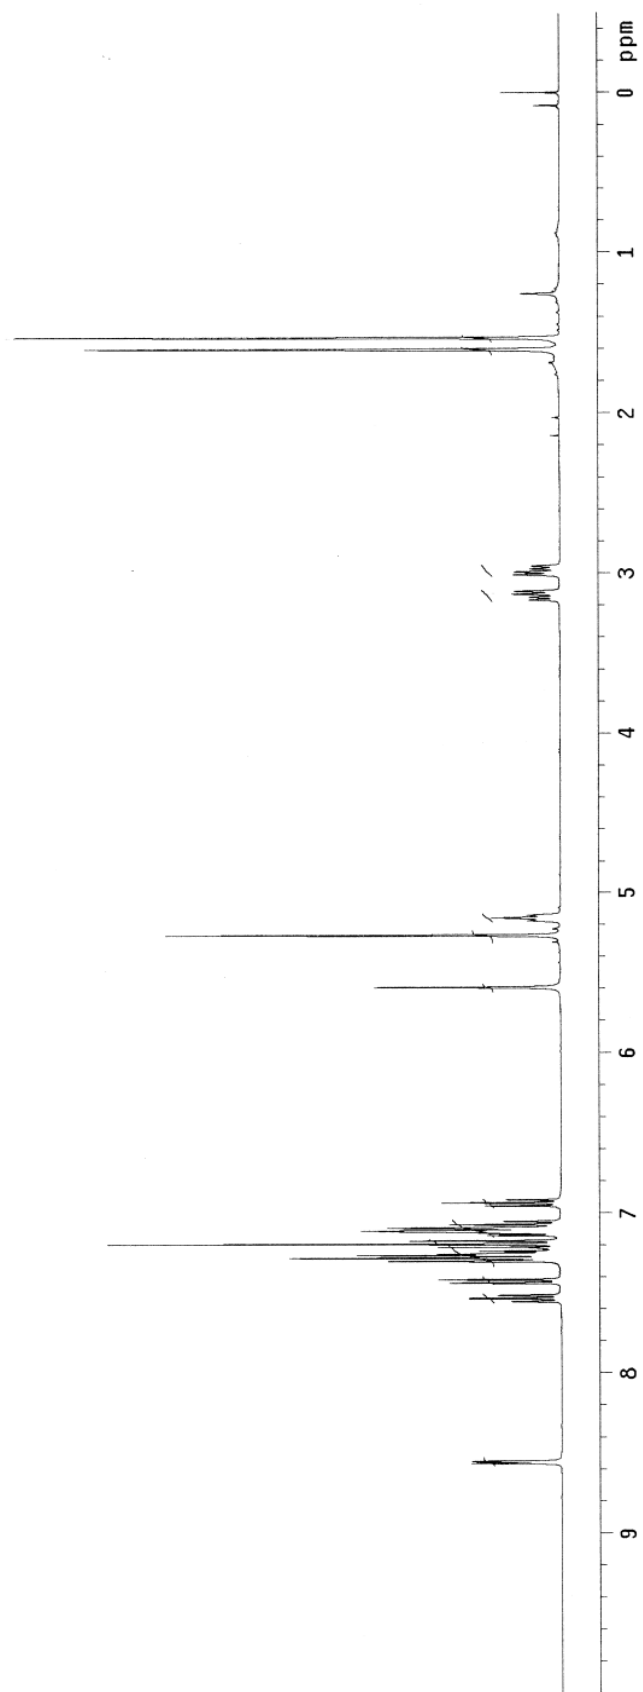

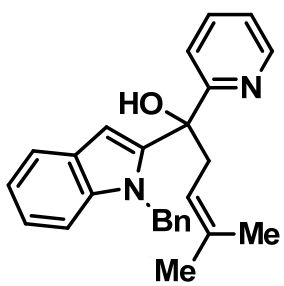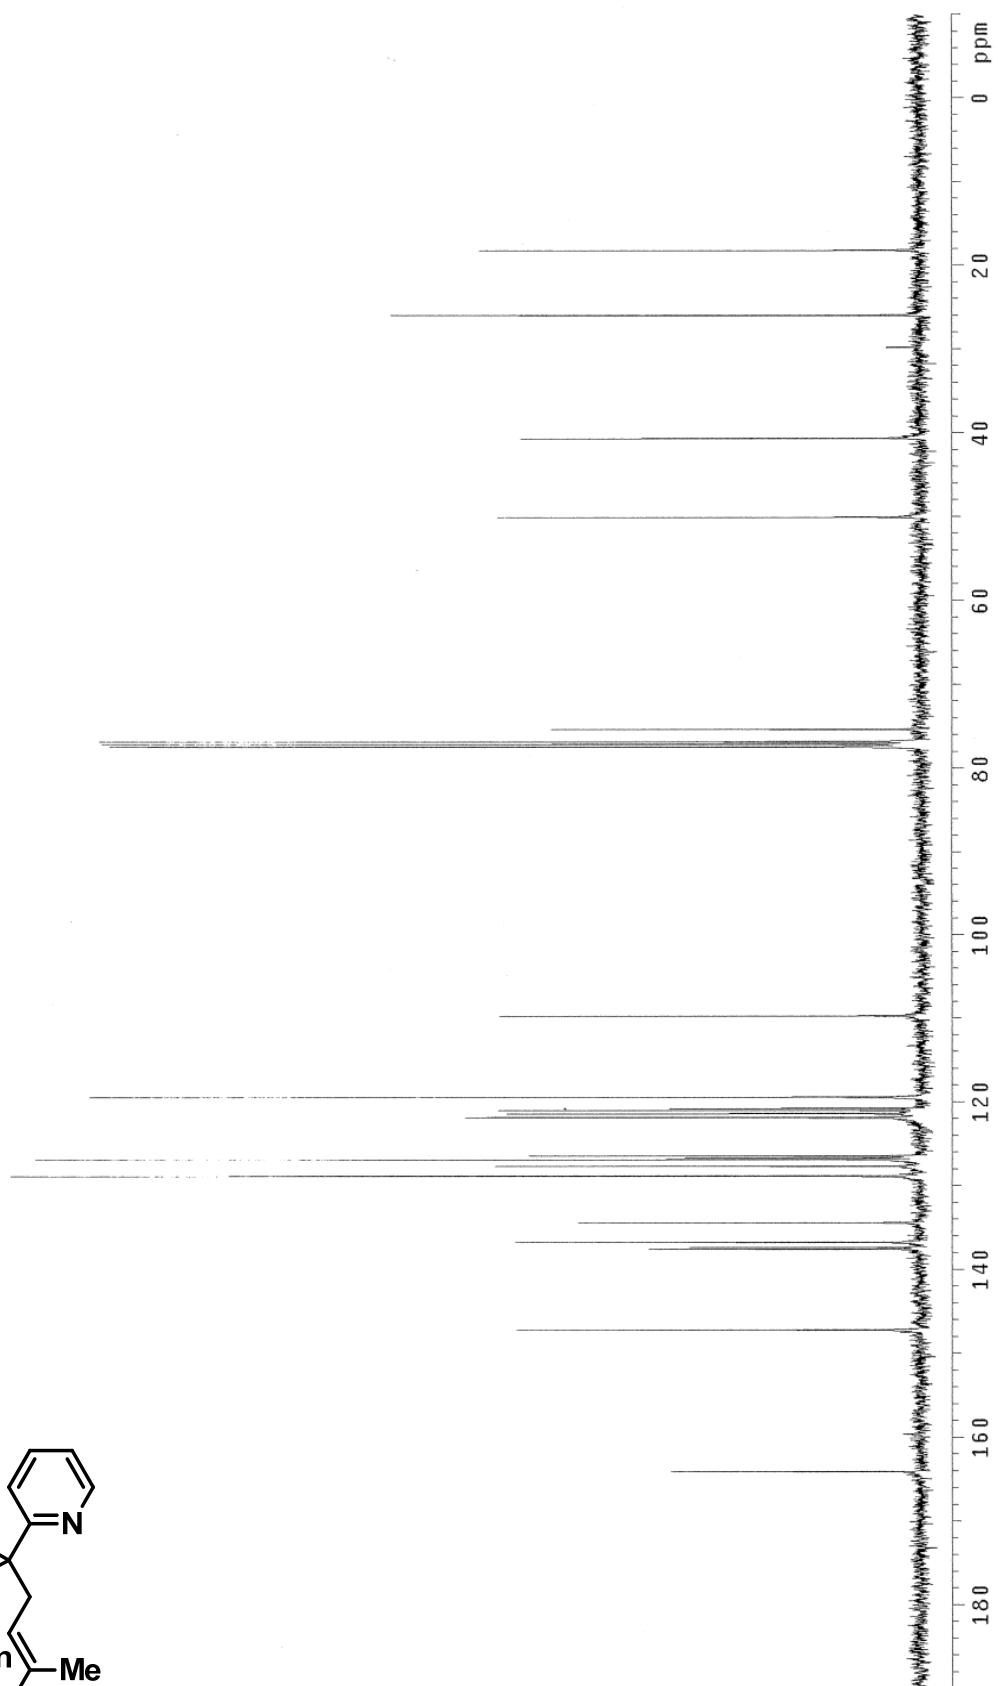



### 2-Thienyl Pyridyl Prenyl Methanol (3i).

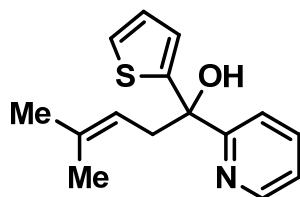

The reaction was performed in accordance with the general procedure. After 18 hours, the reaction mixture was concentrated *in vacuo* and the residue was subjected to flash column chromatography (SiO<sub>2</sub>, 2.5% EtOAc/hexanes) to furnish the title compound (63.0 mg, 90% yield) as a yellow oil.

**<sup>1</sup>H NMR** (400 MHz, CDCl<sub>3</sub>): δ 8.53–8.51 (m, 1H), 7.68 (ddd, *J* = 7.6, 7.6, 1.6 Hz, 1H), 7.44–7.42 (m, 1H), 7.22–7.18 (m, 2H), 7.02–7.01 (m, 1H), 6.94 (dd, *J* = 5.0, 3.4 Hz, 1H), 5.97 (s, 1H), 5.08–5.04 (m, 1H), 3.05 (dd, *J* = 14.8, 3.2 Hz, 1H), 2.98 (dd, *J* = 14.8, 2.4 Hz, 1H), 1.62 (s, 3H), 1.58 (s, 3H).

**<sup>13</sup>C NMR** (100 MHz, CDCl<sub>3</sub>): δ 162.5, 152.1, 147.1, 136.9, 135.1, 126.6, 124.6, 123.3, 122.2, 120.3, 118.4, 41.6, 25.8, 18.2.

**LRMS** (CI) Calcd. for C<sub>15</sub>H<sub>18</sub>NOS [M+H]<sup>+</sup>: 260, Found: 260.

**FTIR** (neat): 3331, 2916, 1591, 1571, 1468, 1433, 1383, 1349, 1294, 1234, 1152, 1108, 1077, 1048, 999, 874, 848, 827, 781, 750, 697 cm<sup>-1</sup>.

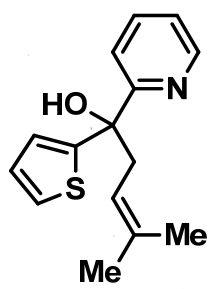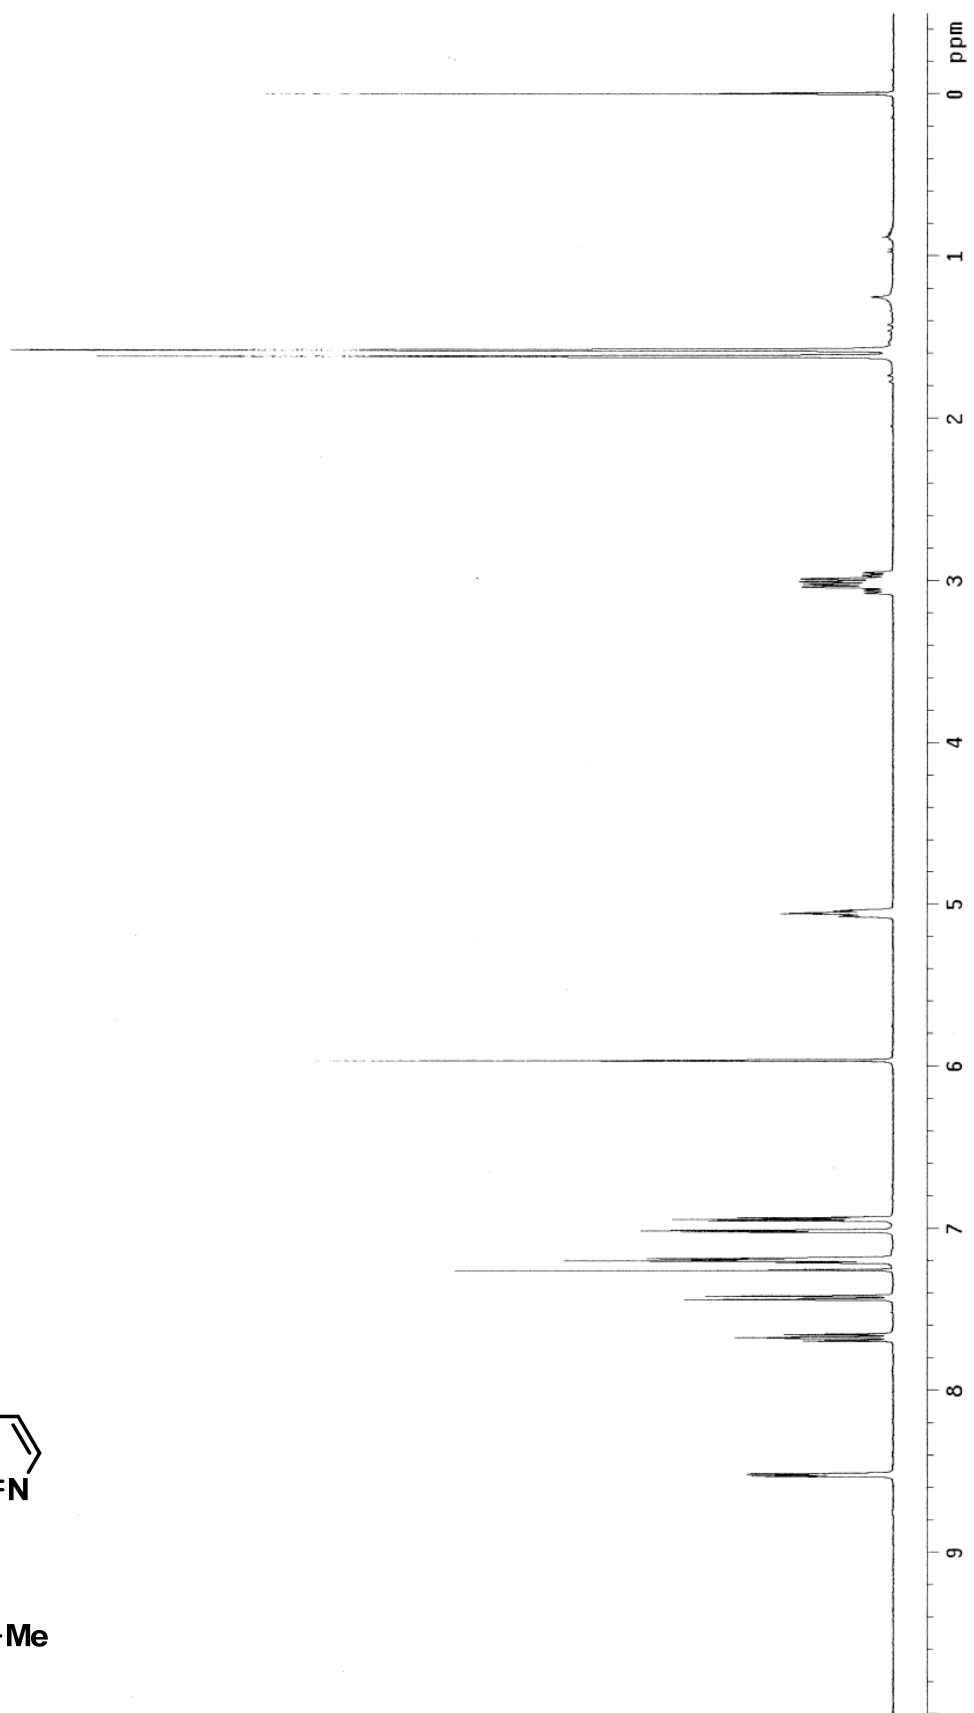

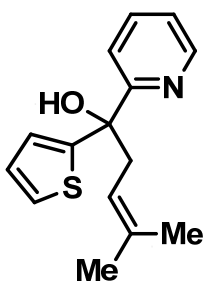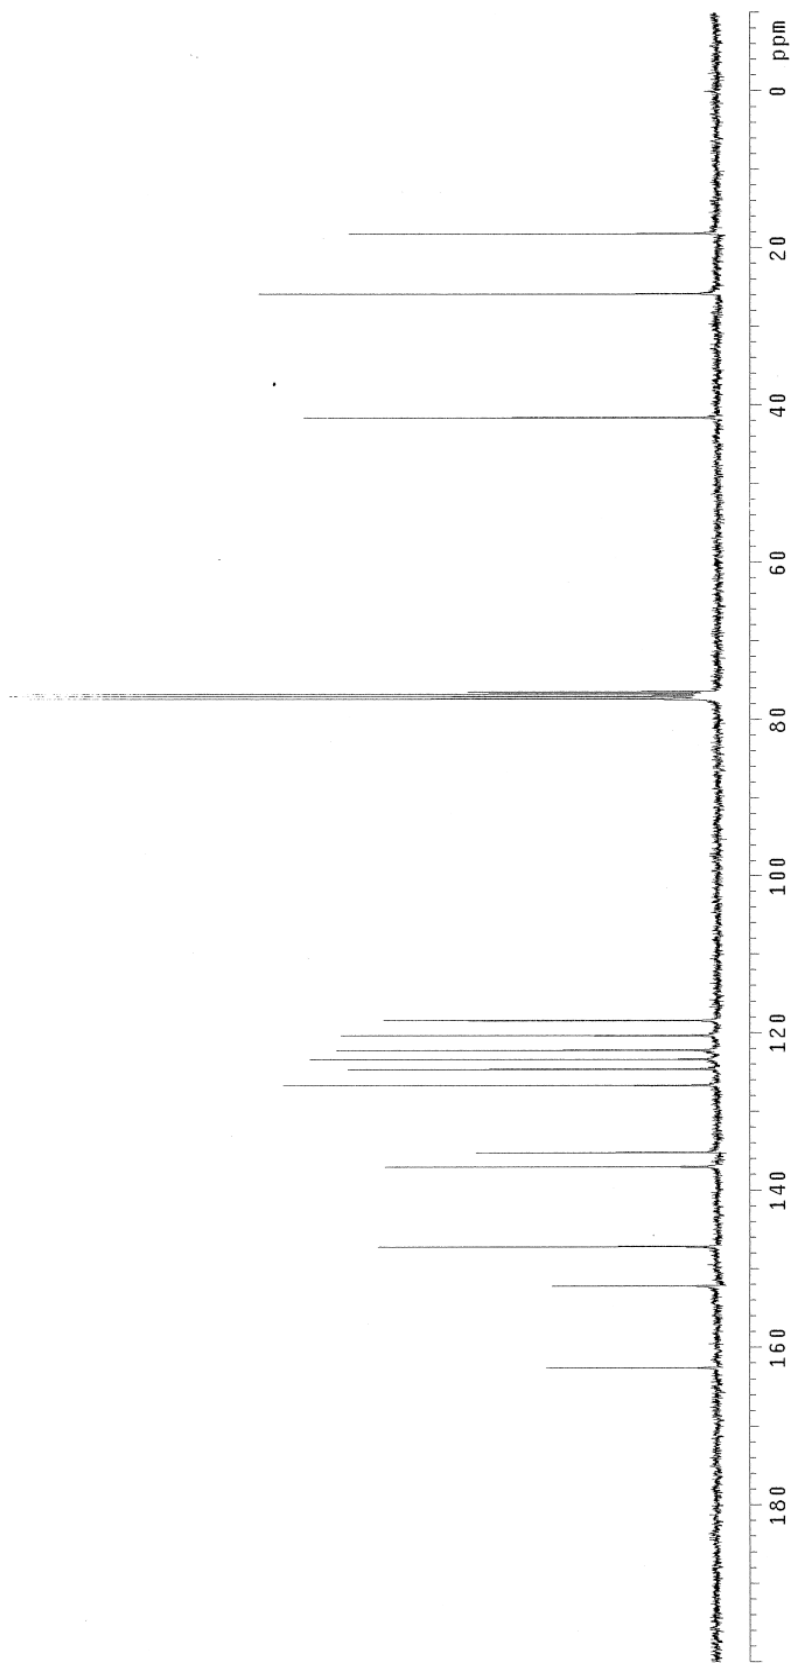

**Isopropyl Pyridyl Prenyl Methanol (3j).**

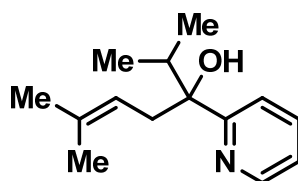

In a modification to the general procedure,  $\text{Ru}_3(\text{CO})_{12}$  (2 mol%) and  $\text{PCy}_3$  (10 mol%) were employed. After 48 hours, the reaction mixture was concentrated *in vacuo* and the residue was subjected to flash column chromatography ( $\text{SiO}_2$ , 2.5% EtOAc/hexanes) to furnish the title compound (43.7 mg, 66% yield) as a yellow oil.

**$^1\text{H NMR}$**  (400 MHz,  $\text{CDCl}_3$ ):  $\delta$  8.51–8.49 (m, 1H), 7.64 (ddd,  $J = 7.6, 7.6, 1.4$  Hz, 1H), 7.25 (d,  $J = 7.6$  Hz, 1H), 7.15 (ddd,  $J = 6.0, 4.8, 1.4$  Hz, 1H), 5.05 (s, 1H), 4.89–4.85 (m, 1H), 2.65 (dd,  $J = 14.8, 7.2$  Hz, 1H), 2.52 (dd,  $J = 14.8, 7.2$  Hz, 1H), 2.05 (heptet,  $J = 6.8$  Hz, 1H), 1.55 (s, 3H), 1.47 (s, 3H), 1.03 (d,  $J = 6.8$  Hz, 3H), 0.63 (d,  $J = 6.8$  Hz, 3H).

**$^{13}\text{C NMR}$**  (100 MHz,  $\text{CDCl}_3$ ):  $\delta$  163.5, 147.0, 136.2, 133.8, 121.5, 120.2, 119.4, 78.1, 37.7, 37.2, 25.8, 18.0, 17.3, 16.8.

**LRMS** (CI) Calcd. for  $\text{C}_{14}\text{H}_{23}\text{NO}$   $[\text{M}+\text{H}]^+$ : 220, Found: 220.

**FTIR** (neat): 3381, 2965, 2914, 2360, 1593, 1570, 1471, 1434, 1384, 1362, 1293, 1179, 1146, 1052, 1025, 999, 895, 838, 784, 751, 727  $\text{cm}^{-1}$ .

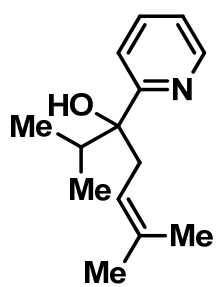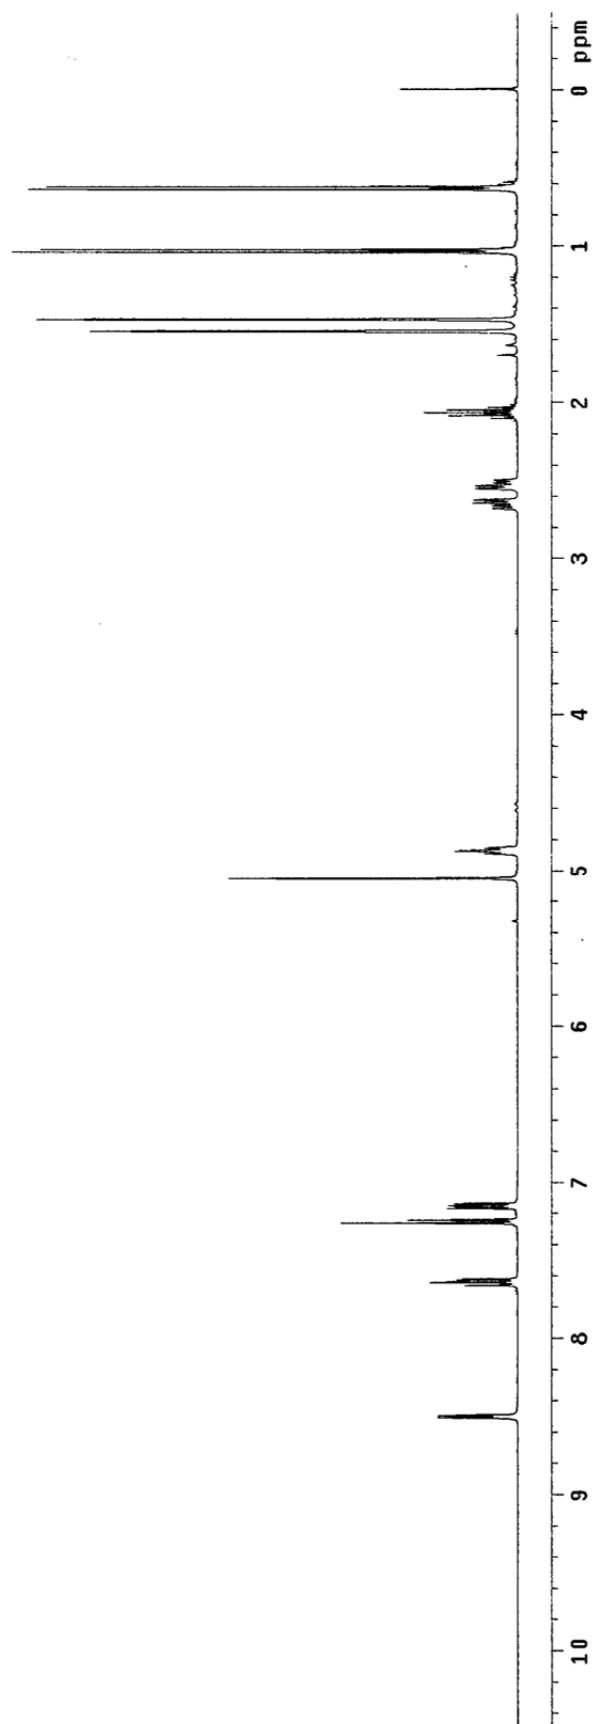

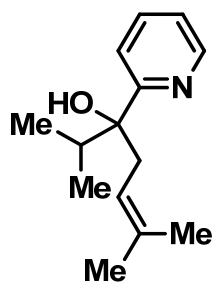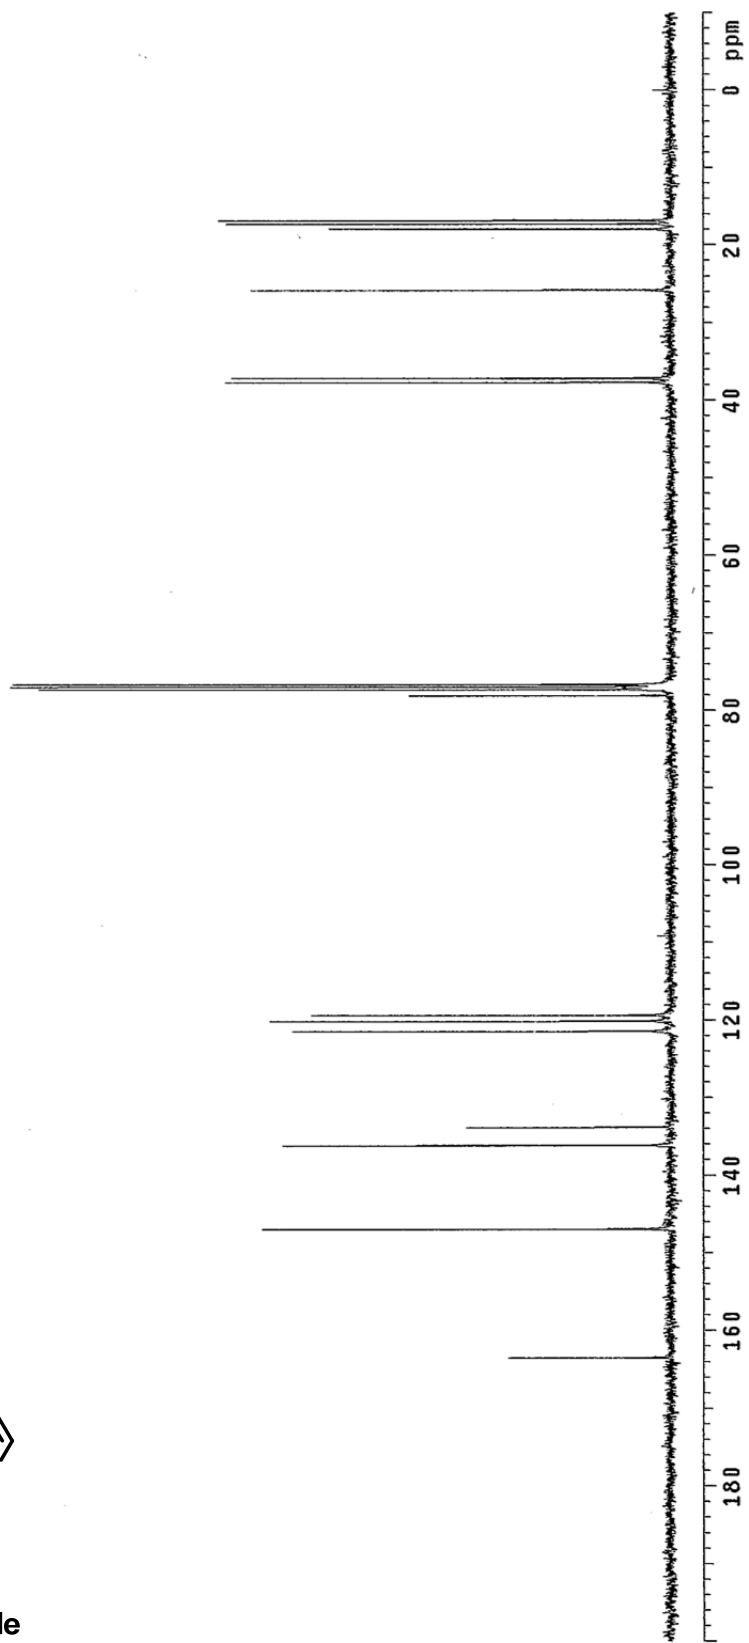

**Cyclopropyl Pyridyl Prenyl Methanol (3k).**

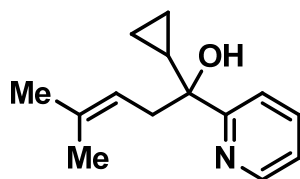

In a modification to the general procedure,  $\text{Ru}_3(\text{CO})_{12}$  (2 mol%) and  $\text{PCy}_3$  (10 mol%) were employed. After 48 hours, the reaction mixture was concentrated *in vacuo* and the residue was subjected to flash column chromatography ( $\text{SiO}_2$ , 2.5% EtOAc/hexanes) to furnish the title compound (43.2 mg, 66%) as a yellow oil.

**$^1\text{H NMR}$**  (400 MHz,  $\text{CDCl}_3$ ):  $\delta$  8.49–8.48 (m, 1H), 7.71–7.67 (m, 1H), 7.39 (dt,  $J = 8.0, 0.8$  Hz, 1H), 7.19 (ddd,  $J = 4.8, 7.6, 1.2$  Hz, 1H), 5.03–4.99 (m, 1H), 4.84 (s, 1H), 2.63 (d,  $J = 7.2$  Hz, 2H), 1.60 (s, 3H), 1.53 (s, 3H), 1.26–1.19 (m, 1H), 0.68–0.62 (m, 1H), 0.47–0.40 (m, 1H), 0.32–0.26 (m, 1H), 0.20–0.13 (m, 1H).

**$^{13}\text{C NMR}$**  (100 MHz,  $\text{CDCl}_3$ ):  $\delta$  164.6, 147.2, 136.8, 134.3, 121.9, 120.1, 119.5, 74.0, 40.8, 26.1, 21.1, 18.2, 1.4.

**LRMS** (CI) Calcd. for  $\text{C}_{14}\text{H}_{20}\text{NO}$   $[\text{M}+\text{H}]^+$ : 218, Found: 218.

**FTIR** (neat): 3429, 3275, 3004, 2963, 2915, 1587, 1570, 1468, 1434, 1397, 1376, 1353, 1292, 1246, 1208, 1190, 1156, 1140, 1113, 1069, 1051, 1038, 1024, 1011, 999, 990, 915, 896, 836, 777, 751, 727  $\text{cm}^{-1}$ .

**MP** 44–46 °C.

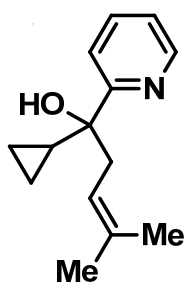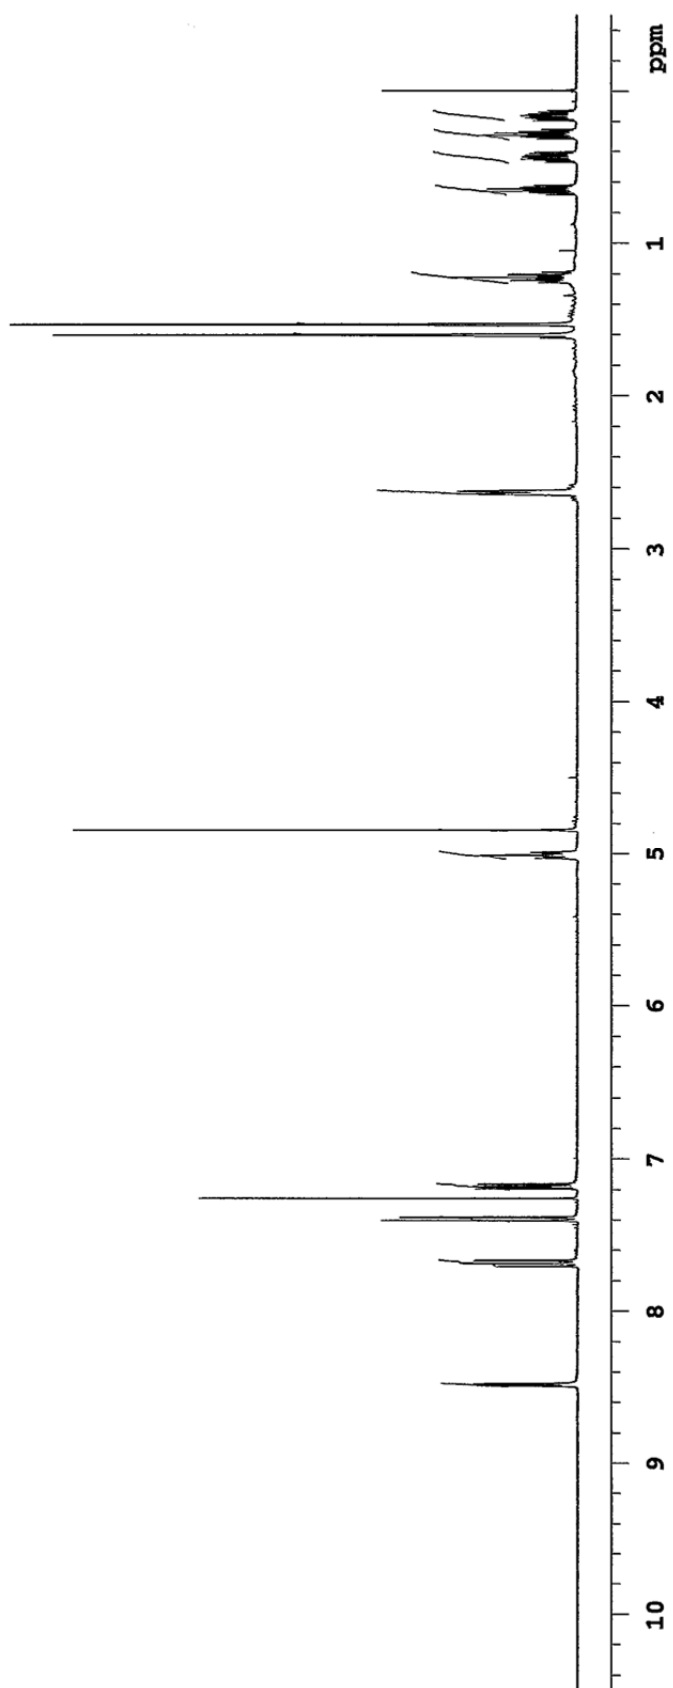



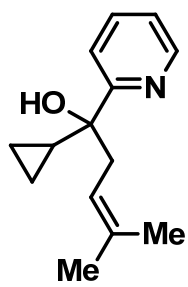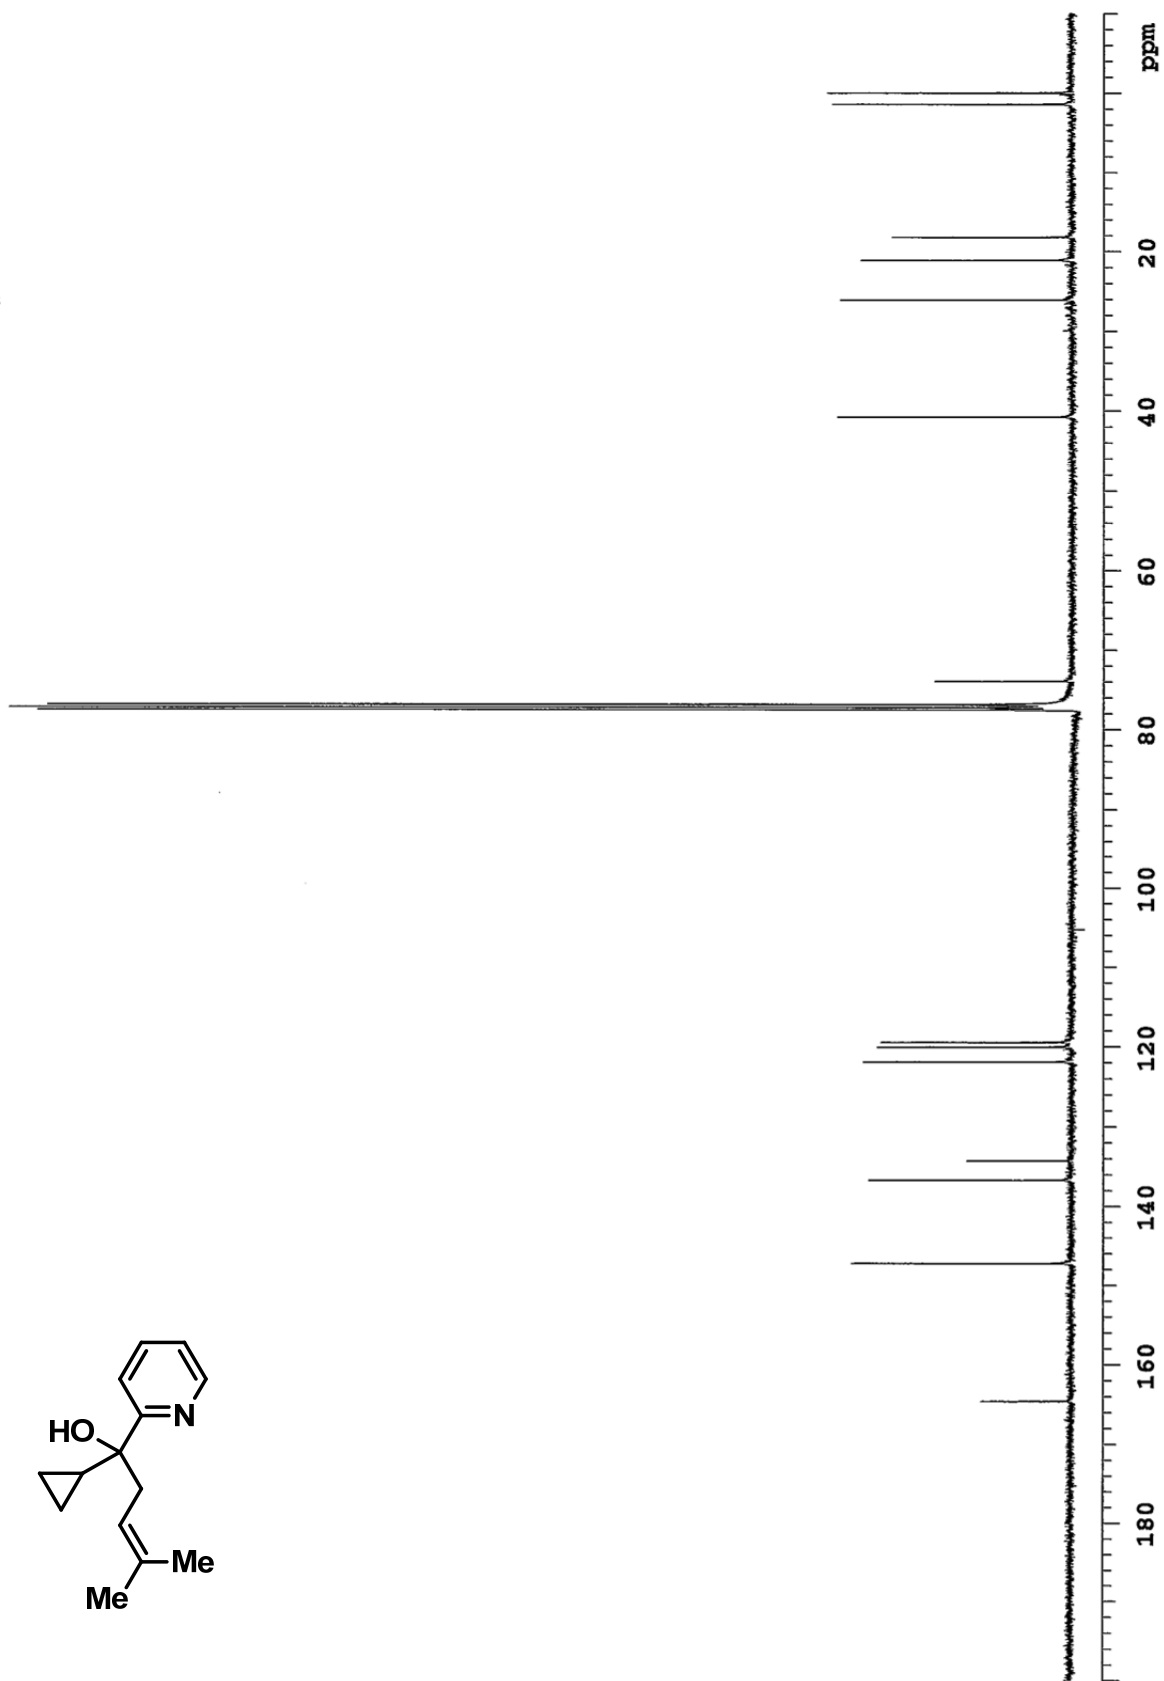

**Cyclohexyl Pyridyl Prenyl Methanol (3l).**

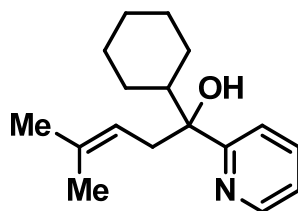

In a modification to the general procedure,  $\text{Ru}_3(\text{CO})_{12}$  (2 mol%) and  $\text{PCy}_3$  (10 mol%) were employed. After 48 hours, the reaction mixture was concentrated *in vacuo* and the residue was subjected to flash column chromatography ( $\text{SiO}_2$ , 2.5% EtOAc/hexanes) to furnish the title compound (39.2 mg, 50% yield) as a yellow oil.

**$^1\text{H NMR}$**  (400 MHz,  $\text{CDCl}_3$ ):  $\delta$  8.50 (dd,  $J = 6.4, 1.2$  Hz, 1H), 7.64 (dt,  $J = 6.4, 1.4$  Hz, 1H), 7.25 (d,  $J = 7.6$  Hz, 1H), 7.15 (dd,  $J = 7.6, 5.6$  Hz, 1H), 5.03 (s, 1H), 4.88–4.84 (m, 1H), 2.66 (dd,  $J = 14.8, 7.2$  Hz, 1H), 2.52 (dd,  $J = 14.4, 6.8$  Hz, 1H), 2.00–1.97 (m, 1H), 1.80–1.77 (m, 1H), 1.73–1.59 (m, 3H), 1.55 (s, 3H), 1.48 (s, 3H), 1.25–1.17 (m, 2H), 1.14–1.13 (m, 1H), 1.11–1.08 (m, 3H).

**$^{13}\text{C NMR}$**  (100 MHz,  $\text{CDCl}_3$ ):  $\delta$  163.6, 147.0, 136.2, 133.9, 121.4, 120.3, 119.4, 78.2, 47.4, 37.2, 27.2, 26.7, 26.6, 26.4, 25.9, 18.0.

**LRMS** (CI) Calcd. for  $\text{C}_{17}\text{H}_{26}\text{NO}$   $[\text{M}+\text{H}]^+$ : 260, Found: 260.

**FTIR** (neat): 2928, 2853, 2359, 1592, 1570, 1471, 1434, 1394, 1114, 1087, 777, 751, 667  $\text{cm}^{-1}$ .

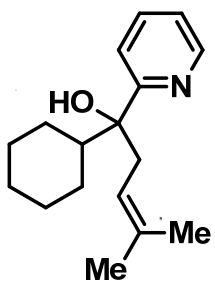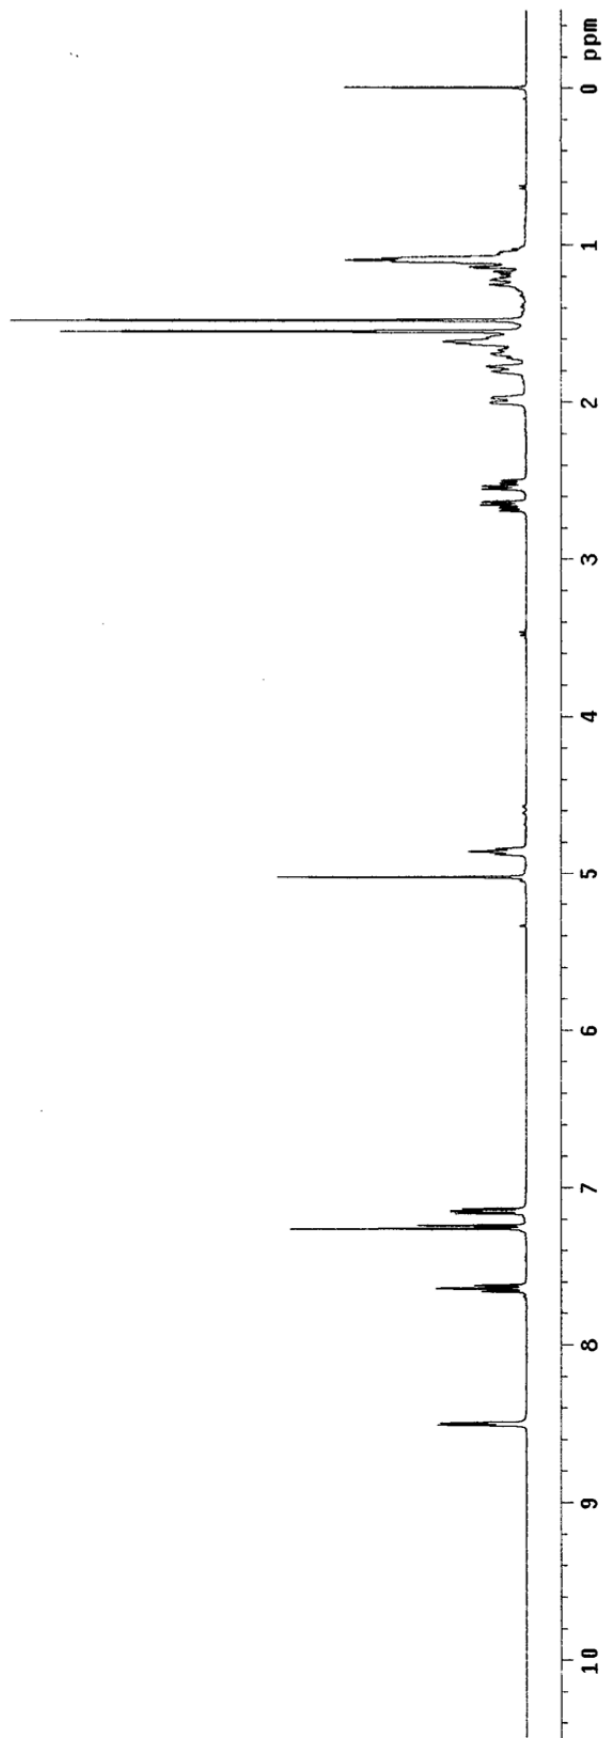

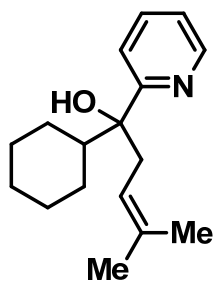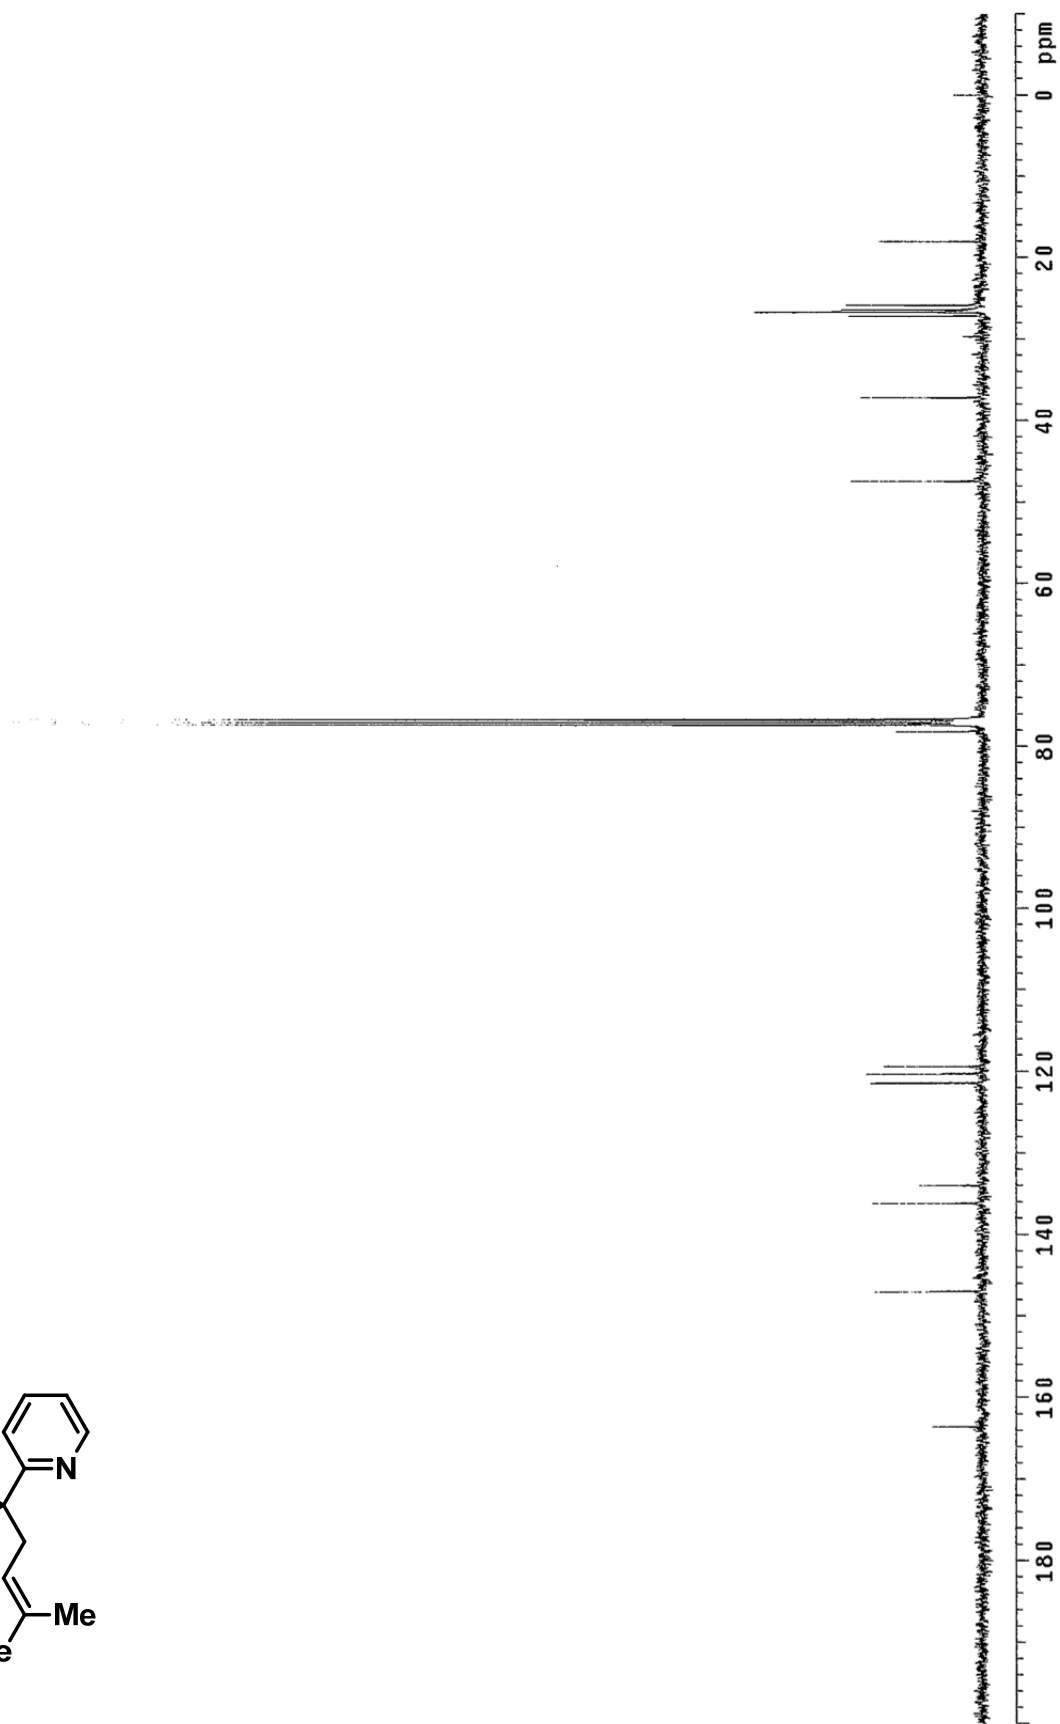

**Pyrimidinyl Pyridyl Prenyl Methanol (3m).**

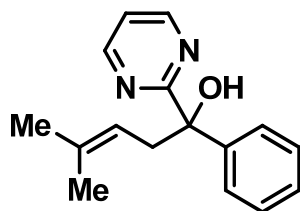

In a modification to the general procedure, the reaction was conducted at 120 °C. After 18 hours, the reaction mixture was concentrated *in vacuo* and the residue was subjected to flash column chromatography (SiO<sub>2</sub>, 2.5% EtOAc/hexanes) to furnish the title compound (69.4 mg, 91% yield) as a yellow oil.

**<sup>1</sup>H NMR** (400 MHz, CDCl<sub>3</sub>): δ 8.72 (d, *J* = 4.8 Hz, 2H), 7.76–7.73 (m, 2H), 7.34–7.29 (m, 2H), 7.23–7.19 (m, 1H), 7.16 (t, *J* = 4.8 Hz, 1H), 5.37 (s, 1H), 5.07–5.02 (m, 1H), 3.22 (dd, *J* = 14.4, 7.2 Hz, 1H), 3.06 (dd, *J* = 14.8, 6.8 Hz, 1H), 1.60 (s, 3H), 1.60 (s, 3H).

**<sup>13</sup>C NMR** (100 MHz, CDCl<sub>3</sub>): δ 172.3, 156.8, 145.5, 134.7, 128.1, 127.0, 126.1, 119.1, 119.1, 78.7, 40.3, 26.0, 18.3.

**LRMS** (CI) Calcd. for C<sub>16</sub>H<sub>19</sub>N<sub>2</sub>O [M+H]<sup>+</sup>: 255, Found: 255.

**FTIR** (neat): 3439, 2969, 2913, 1738, 1672, 1572, 1562, 1492, 1447, 1418, 1374, 1263, 1199, 1118, 1090, 1066, 1032, 997 cm<sup>-1</sup>.

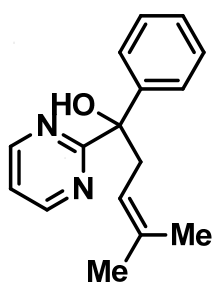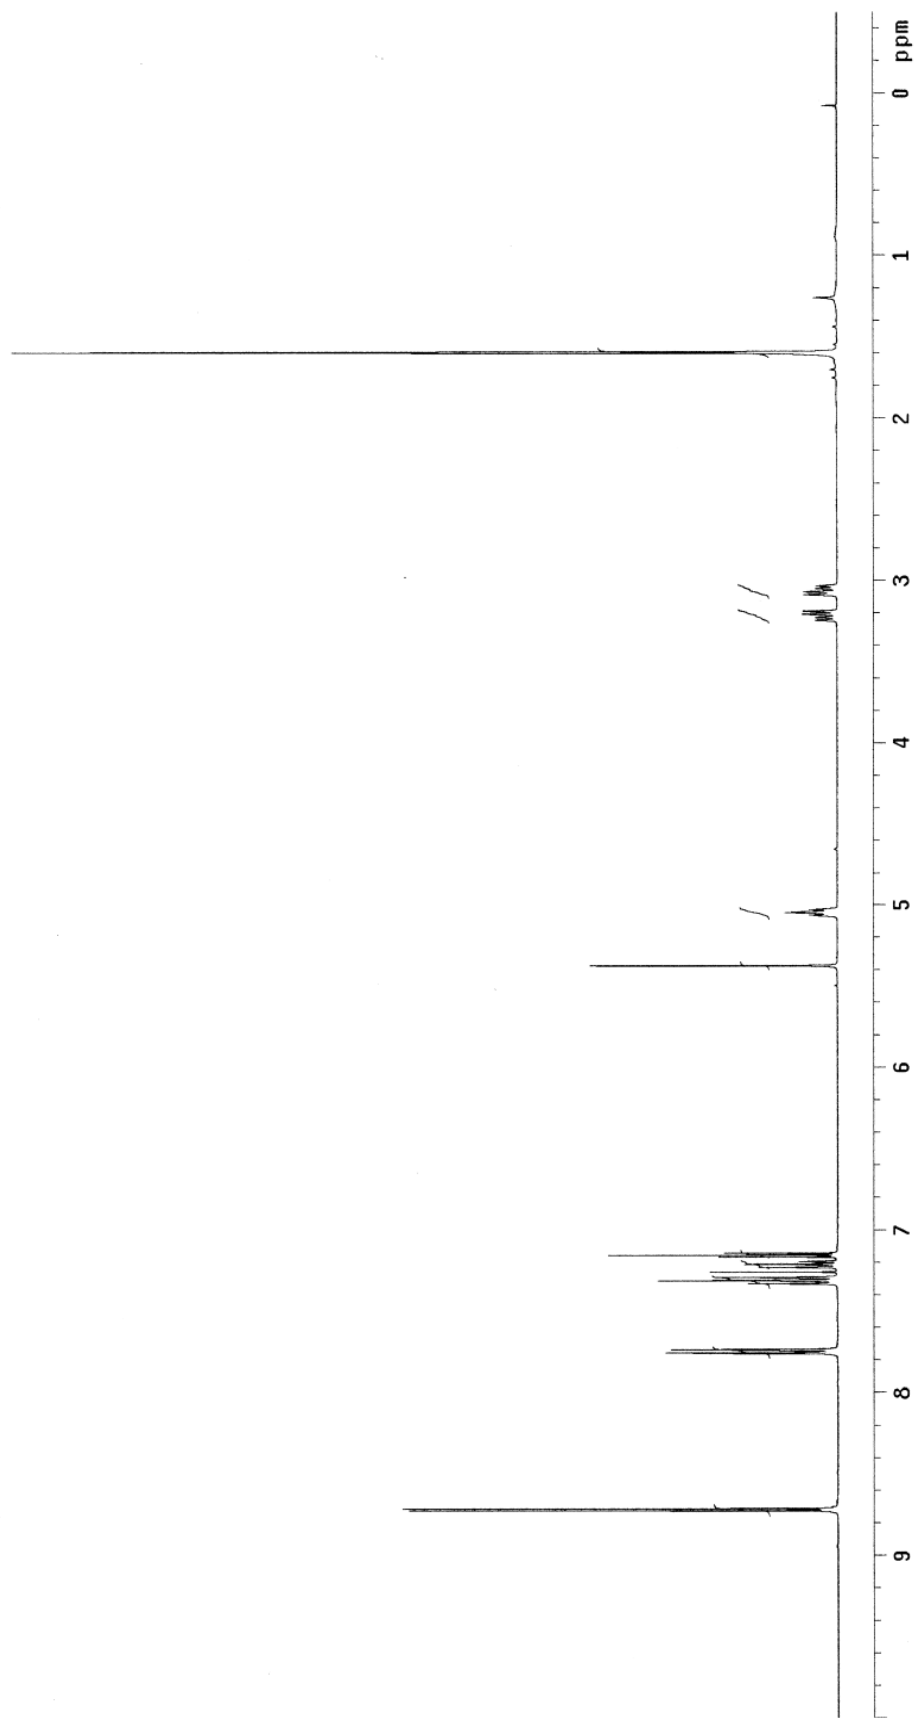

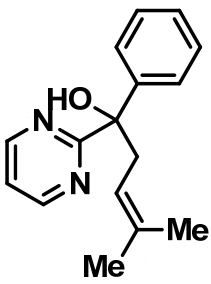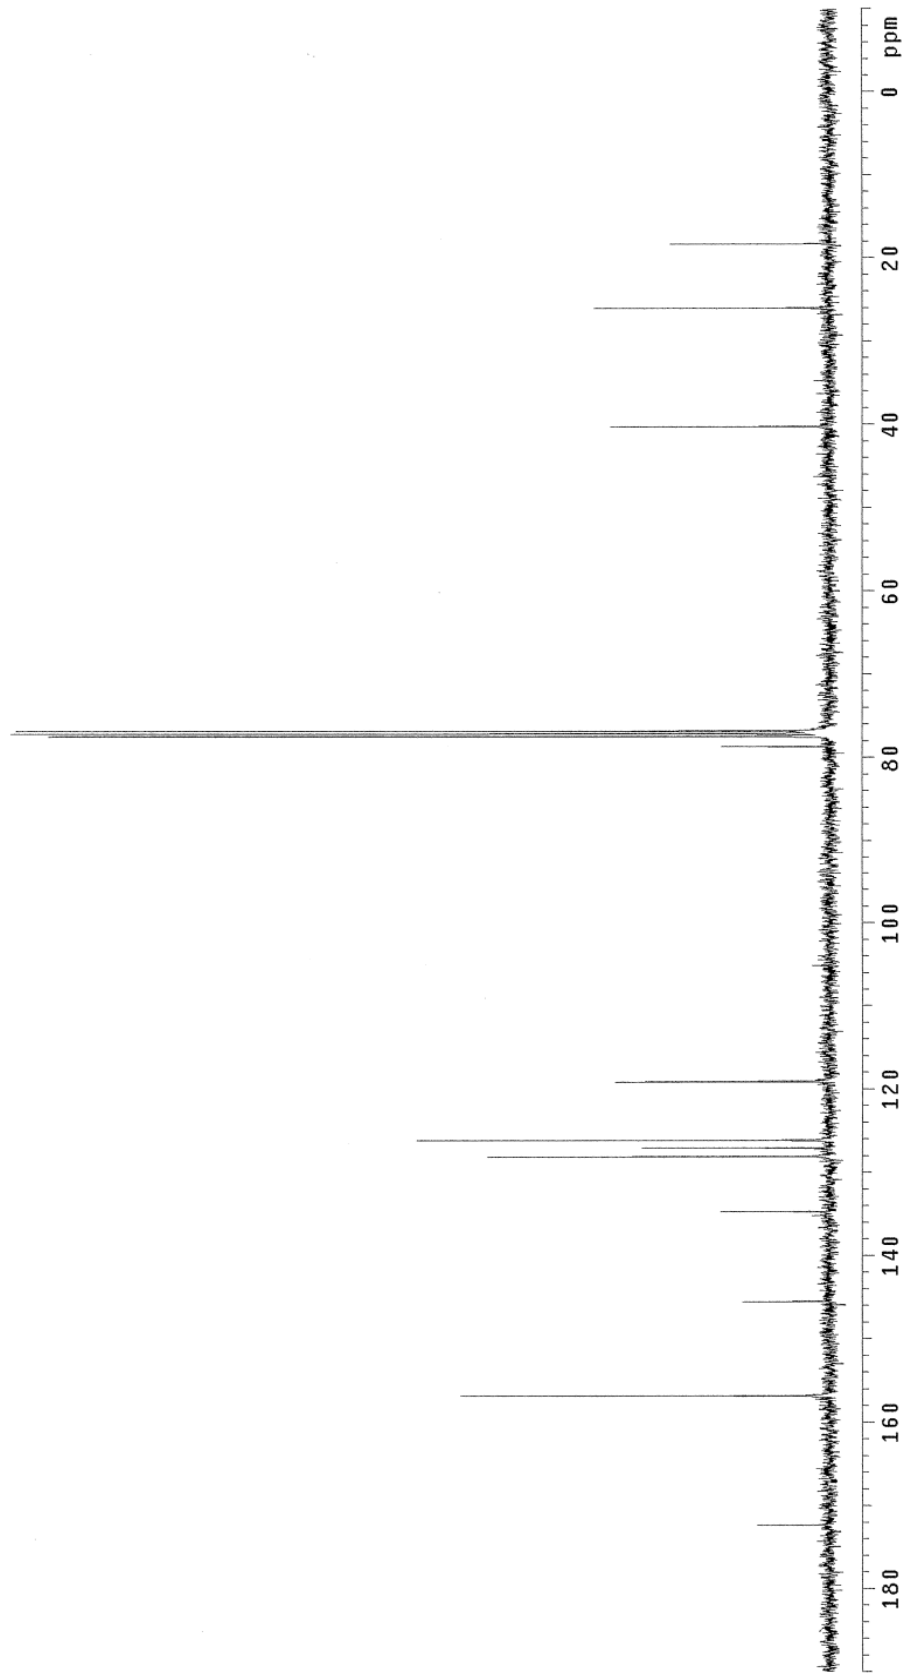

**Benzoxazolyl Pyridyl Prenyl Methanol (3n).**

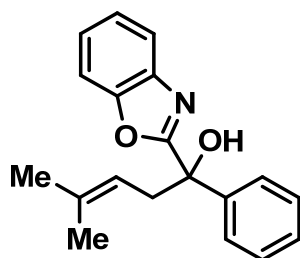

In a modification to the general procedure,  $\text{Ru}_3(\text{CO})_{12}$  (2 mol%) was employed. After 24 hours, the reaction mixture was concentrated *in vacuo* and the residue was subjected to flash column chromatography ( $\text{SiO}_2$ , 2.5% EtOAc/hexanes) to furnish the title compound (77.4 mg, 88% yield) as a yellow oil.

**$^1\text{H NMR}$**  (400 MHz,  $\text{CDCl}_3$ ):  $\delta$  8.05–8.03 (m, 1H), 7.86–7.83 (m, 1H), 7.75–7.72 (m, 2H), 7.51–7.49 (m, 1H), 7.38–7.33 (m, 3H), 7.29–7.25 (m, 1H), 5.14–5.09 (m, 1H), 3.56 (s, 1H), 3.43 (dd,  $J = 14.4$ , 6.8 Hz, 1H), 3.10 (dd,  $J = 14.4$ , 8.0 Hz, 1H), 1.67 (s, 3H), 1.65 (s, 3H).

**$^{13}\text{C NMR}$**  (100 MHz,  $\text{CDCl}_3$ ):  $\delta$  168.5, 151.2, 142.4, 140.6, 138.1, 128.5, 128.4, 127.8, 125.4, 125.1, 124.6, 124.5, 120.2, 117.1, 110.9, 75.7, 40.1, 26.0, 18.2.

**$\text{LRMS}$**  (ESI) Calcd. for  $\text{C}_{19}\text{H}_{19}\text{NaNO}_2$  [ $\text{M}+\text{Na}$ ] $^+$ : 316, Found: 316.

**$\text{FTIR}$**  (neat): 3414, 3058, 2914, 2357, 1610, 1560, 1494, 1474, 1454, 1376, 1241, 1159, 1096, 1069, 1033, 1003, 929, 908, 879, 840, 794, 761, 746, 726, 698, 667  $\text{cm}^{-1}$ .



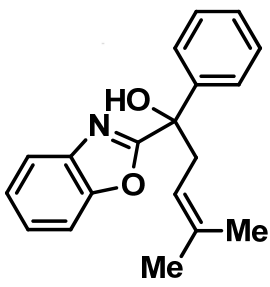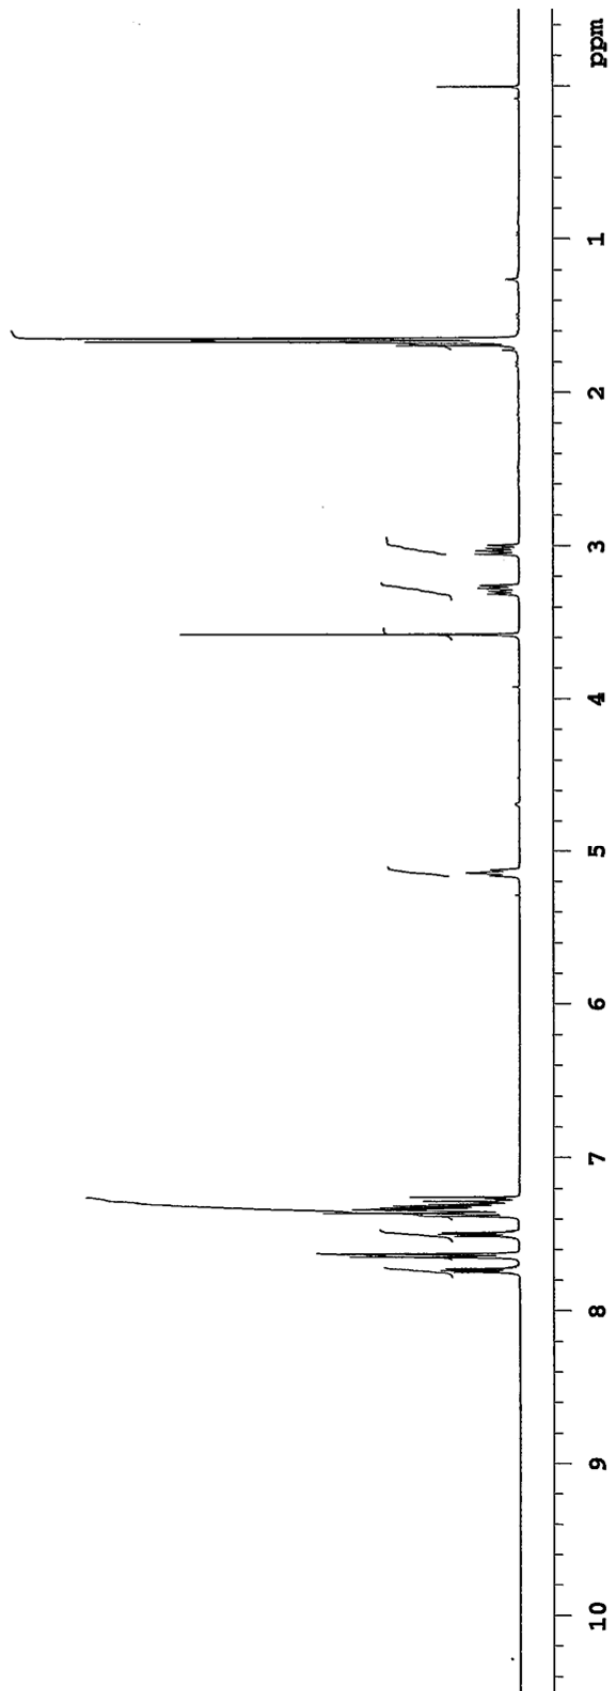

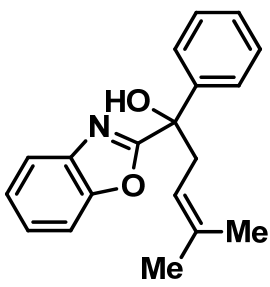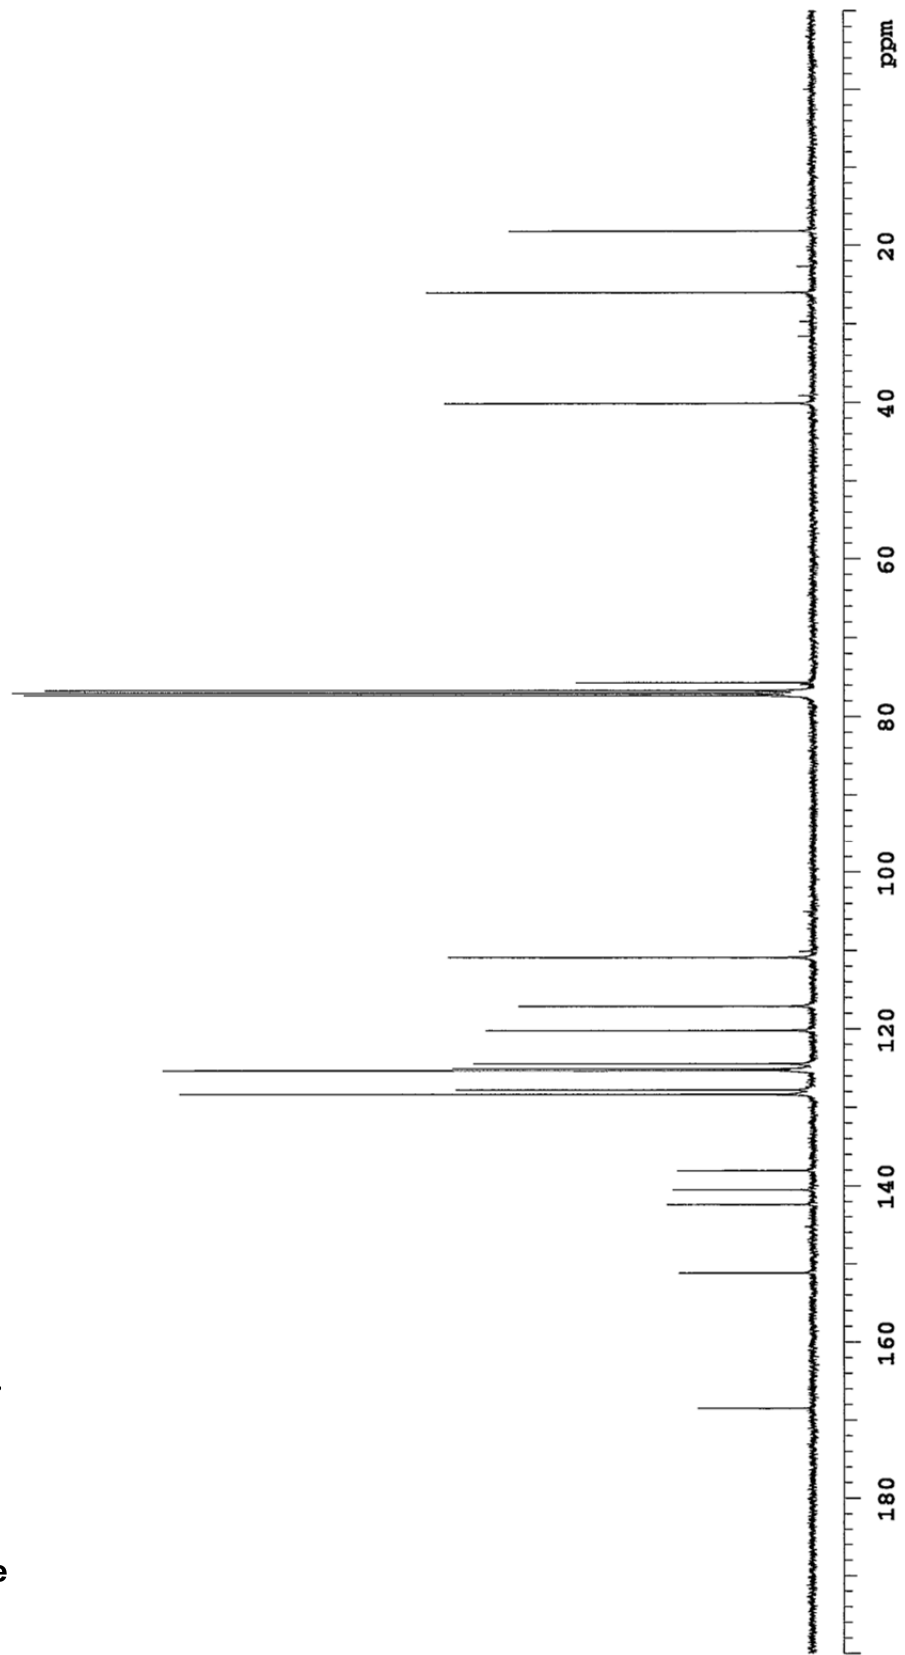

**Thiazolyl Pyridyl Prenyl Methanol (3o).**

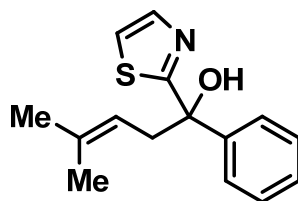

The reaction was performed in accordance with the general procedure. After 18 hours, the reaction mixture was concentrated *in vacuo* and the residue was subjected to flash column chromatography (SiO<sub>2</sub>, 2.5% EtOAc/hexanes) to furnish the title compound (76.5 mg, 86% yield) as a brown solid.

**<sup>1</sup>H NMR** (400 MHz, CDCl<sub>3</sub>): δ 7.72 (d, *J* = 3.2 Hz, 1H), 7.65 (d, *J* = 7.6 Hz, 2H), 7.33 (t, *J* = 7.6 Hz, 2H), 7.25 (d, *J* = 6.8 Hz, 1H), 7.22 (d, *J* = 3.2 Hz, 1H), 5.02 (t, *J* = 6.8 Hz, 1H), 3.51 (s, 1H), 3.26 (dd, *J* = 14.4, 6.8 Hz, 1H), 3.04 (dd, *J* = 14.4, 8.0 Hz, 1H), 1.68 (s, 3H), 1.66 (s, 3H).

**<sup>13</sup>C NMR** (100 MHz, CDCl<sub>3</sub>): δ 178.0, 144.4, 142.5, 138.8, 128.3, 127.4, 125.5, 119.5, 117.7, 78.2, 41.9, 26.2, 18.4.

**LRMS** (CI) Calcd. for C<sub>15</sub>H<sub>18</sub>NOS [M+H]<sup>+</sup>: 260, Found: 260.

**FTIR** (neat): 3117, 2970, 2912, 2852, 1739, 1506, 1495, 1444, 1378, 1232, 1204, 1150, 1097, 1061, 984, 938, 918, 856, 821, 781, 765, 725, 696, 670 cm<sup>-1</sup>.

**MP** 97.3–98.3 °C.

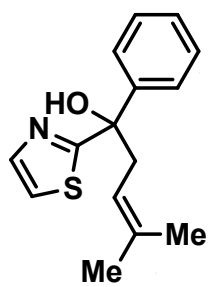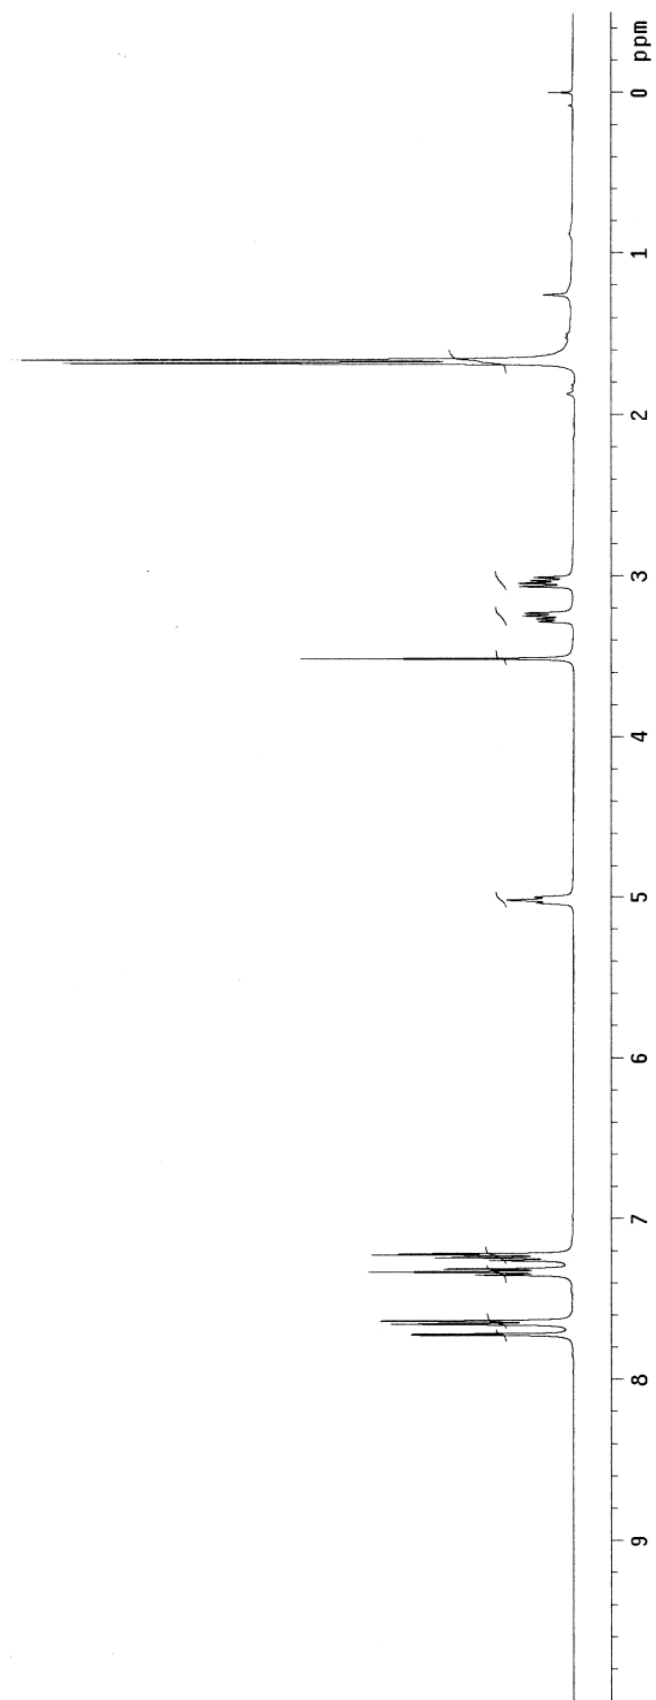

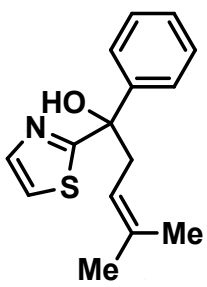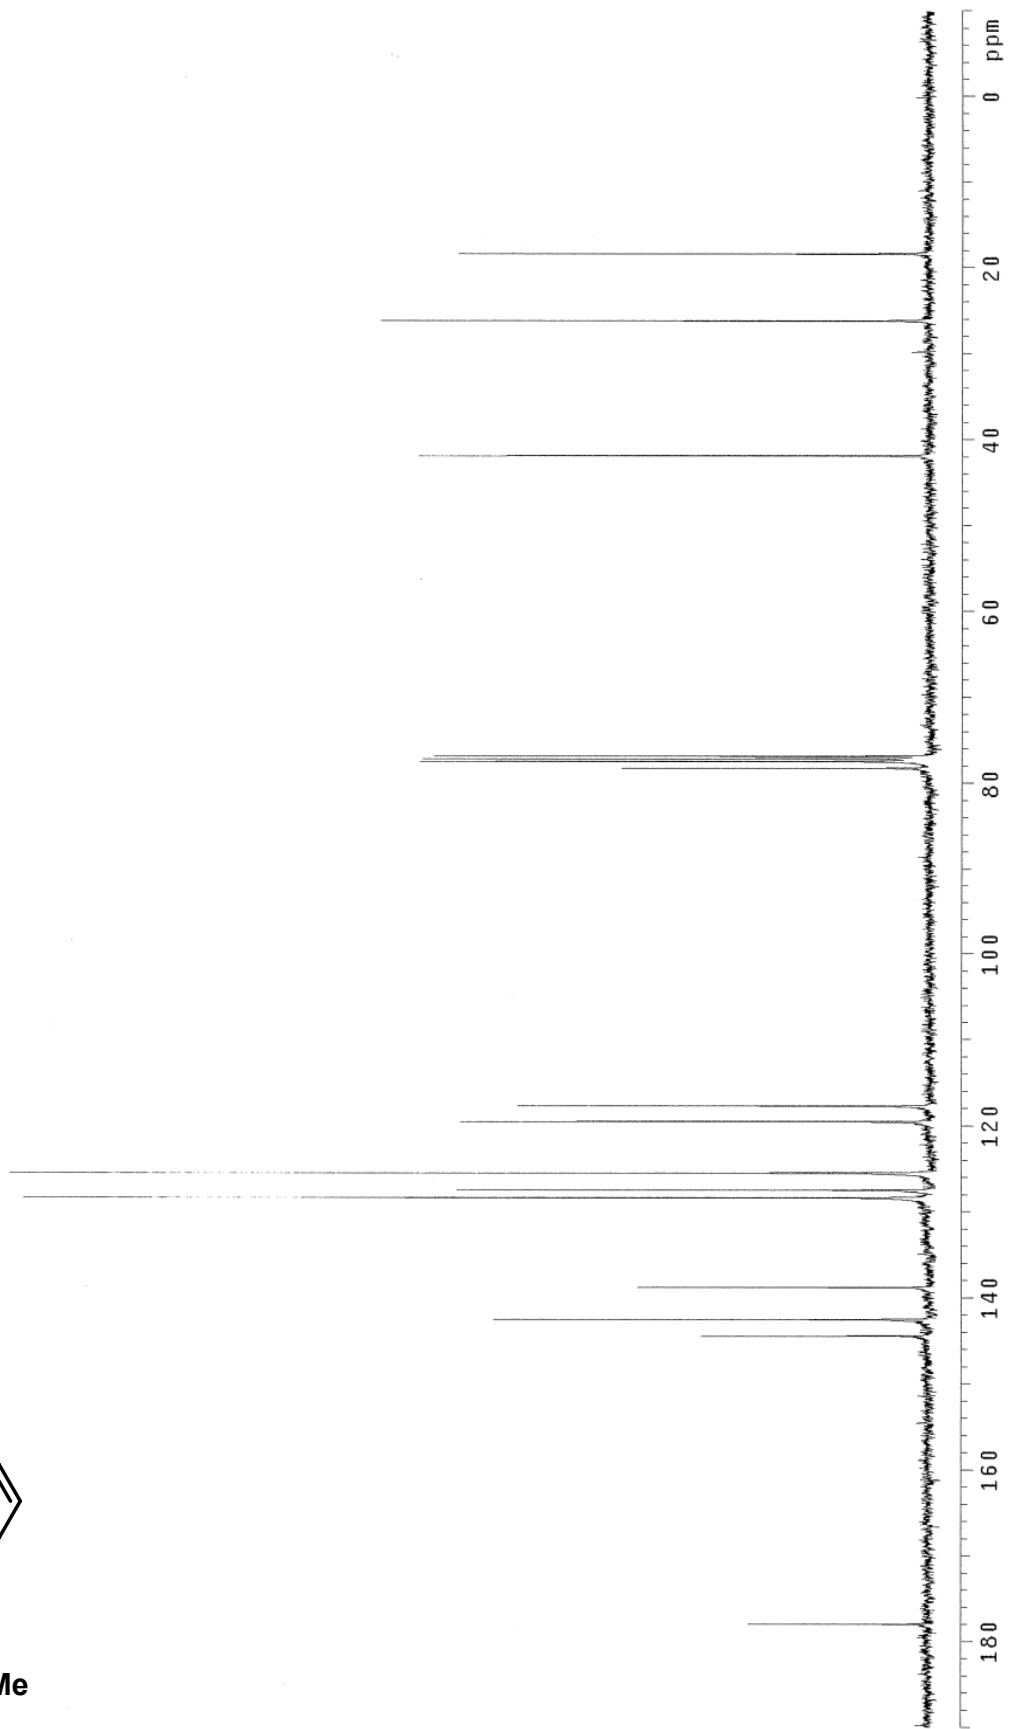

**c. Charaterization of  $\pi$ -Allyl Oxaruthenacycle complex Derived from butadiene.**

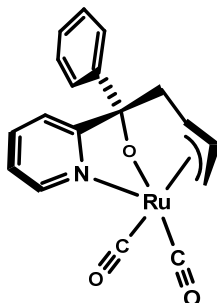

**$^1\text{H NMR}$**  (400 MHz,  $\text{CDCl}_3$ ):  $\delta$  8.63-8.61 (m, 1H), 7.48 (ddd,  $J = 8.0, 8.0, 1.6$  Hz, 1H), 7.43-7.40 (m, 2H), 7.25-7.21 (m, 2H), 7.18-7.14 (m, 1H), 7.09-7.06 (m, 1H), 6.78 (ddd,  $J = 8.0, 1.2, 1.2$  Hz, 1H), 5.34-5.27 (m, 1H), 4.04-3.98 (m, 1H), 3.48 (ddd,  $J = 7.6, 1.2, 1.2$  Hz, 1H), 2.65-2.61 (m, 1H), 2.52 (dd,  $J = 11.6, 8.4$  Hz, 1H), 1.42-1.37 (m, 1H).

**$^{13}\text{C NMR}$**  (100 MHz,  $\text{CDCl}_3$ ):  $\delta$  198.7, 197.3, 172.1, 153.5, 147.2, 137.0, 128.3, 127.2, 122.5, 122.1, 105.0, 95.6, 80.3, 53.6, 45.5, 35.4.

**HRMS** (CI) Calcd. for  $\text{C}_{19}\text{H}_{18}\text{NO}_3\text{Ru}$   $[\text{M}+\text{H}]^+$ : 396.0095, Found: 396.0181.

**FTIR** (neat): 2014, 1941  $\text{cm}^{-1}$ .

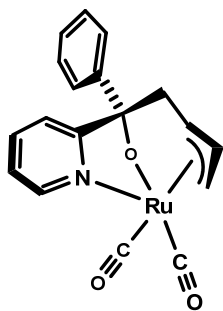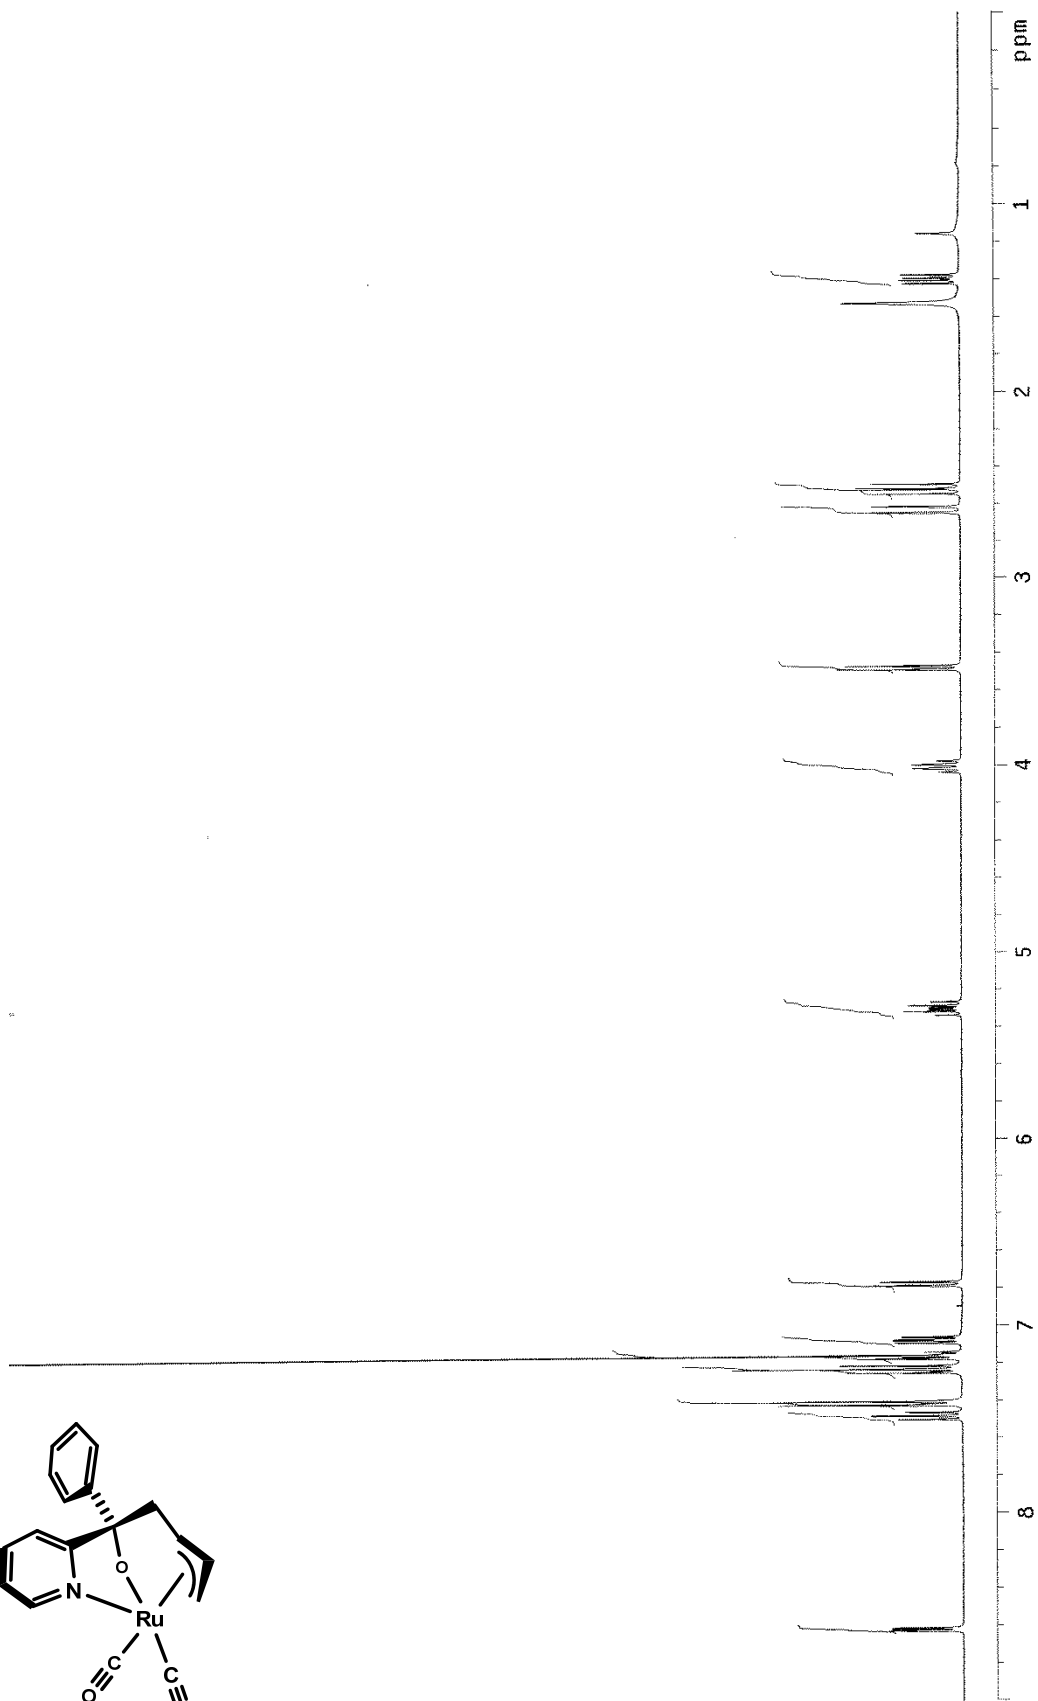

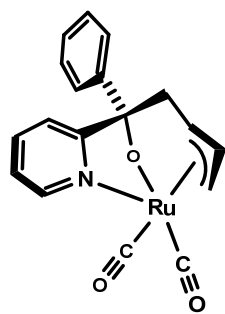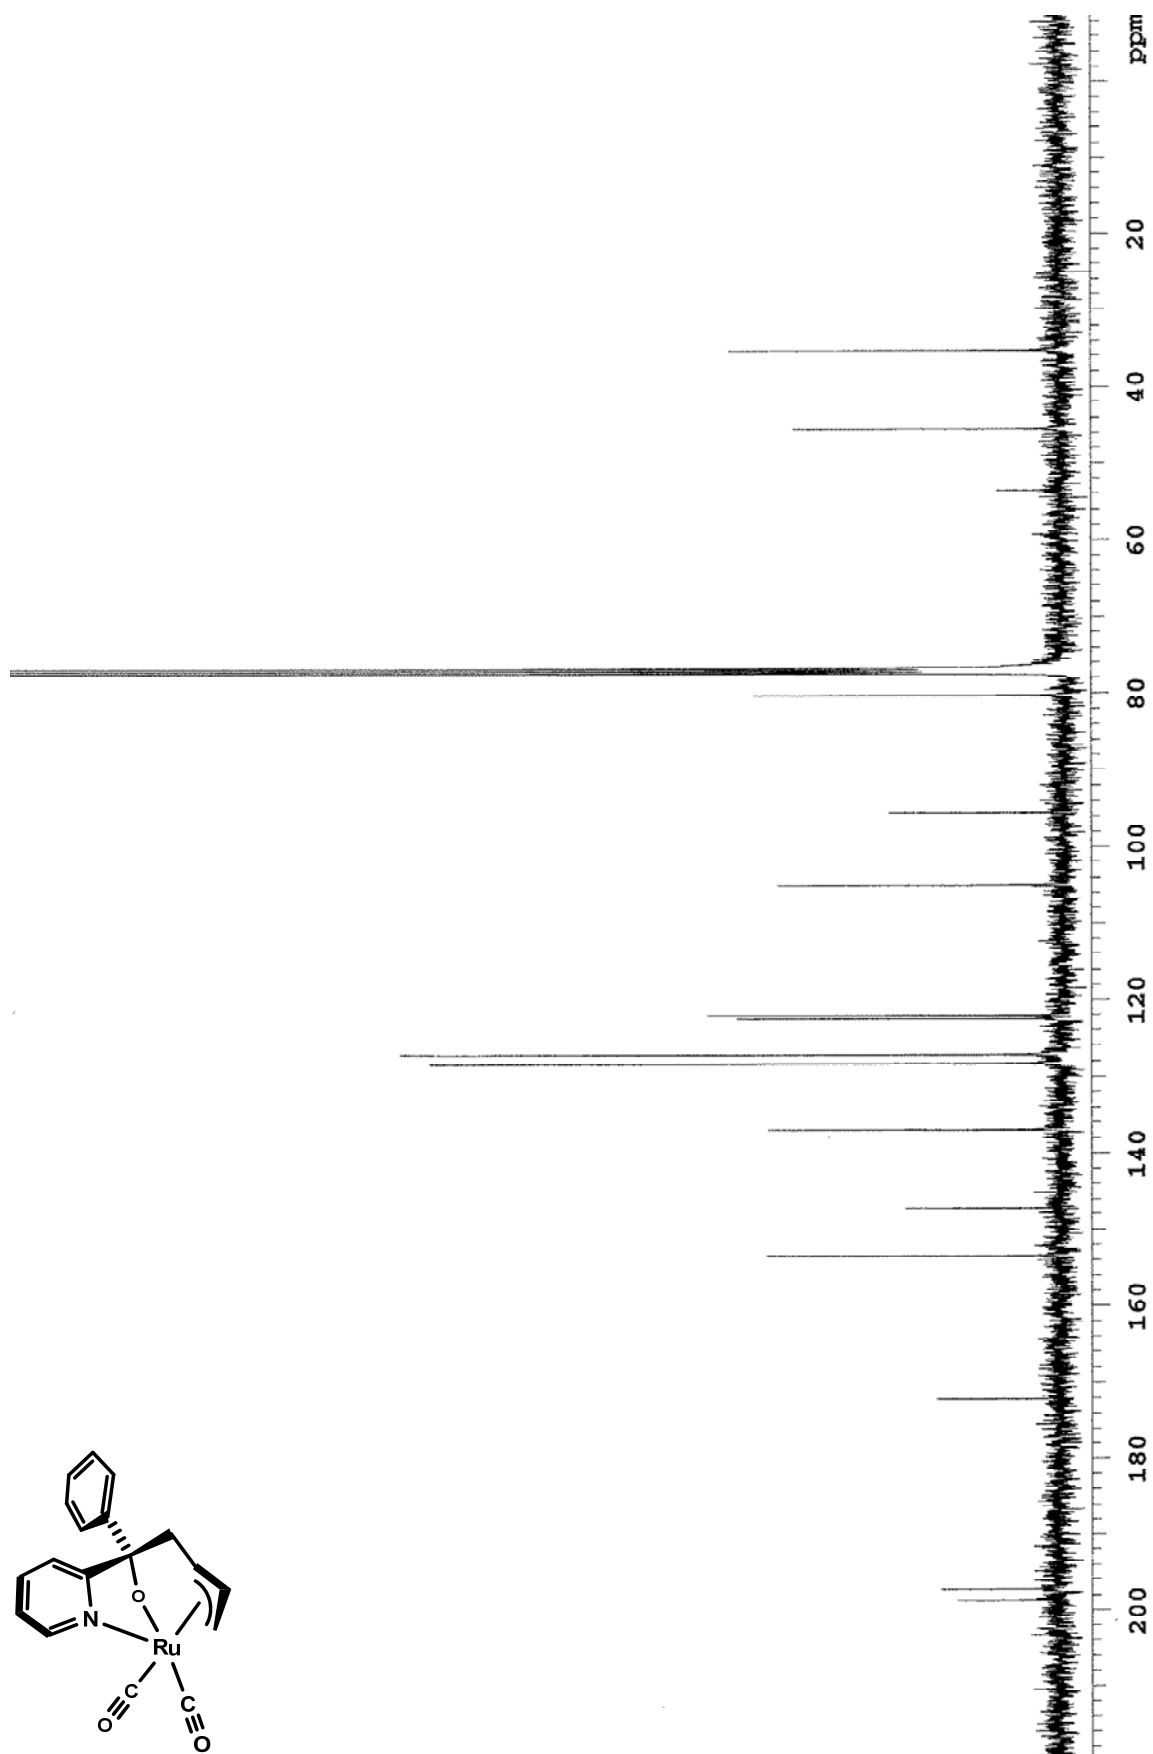



**c. Characterization of  $\pi$ -Allyl Oxaruthenacycle complex Derived from Isoprene.**

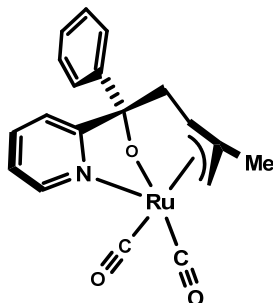

**$^1\text{H NMR}$**  (400 MHz,  $\text{CDCl}_3$ ):  $\delta$  8.71 (ddd,  $J = 5.2, 0.8, 0.8$  Hz, 1H), 7.57 (td,  $J = 7.6, 1.6$  Hz, 1H), 7.53-7.50 (m, 2H), 7.35-7.31 (m, 2H), 7.28-7.23 (m, 1H), 7.19-7.15 (m, 1H), 6.88-6.86 (m, 1H), 3.95-3.91 (m, 1H), 3.47 (dd,  $J = 1.6, 1.6$  Hz, 1H), 2.76 (dd,  $J = 1.2, 0.8$  Hz, 1H), 2.60 (dd,  $J = 12.0, 8.8$  Hz, 1H), 2.18 (s, 3H), 1.45 (dd,  $J = 12.0, 6.8$  Hz, 1H).

**$^{13}\text{C NMR}$**  (100 MHz,  $\text{CDCl}_3$ ):  $\delta$  198.7, 198.1, 172.0, 153.2, 147.0, 136.7, 128.1, 127.1, 127.0, 122.3, 121.8, 121.7, 94.9, 79.2, 47.1, 35.9, 28.5.

**HRMS** (CI) Calcd. for  $\text{C}_{19}\text{H}_{18}\text{NO}_3\text{Ru}$   $[\text{M}+\text{H}]^+$ : 410.0252, Found: 410.0340

**FTIR** (neat): 2008, 1929  $\text{cm}^{-1}$ .

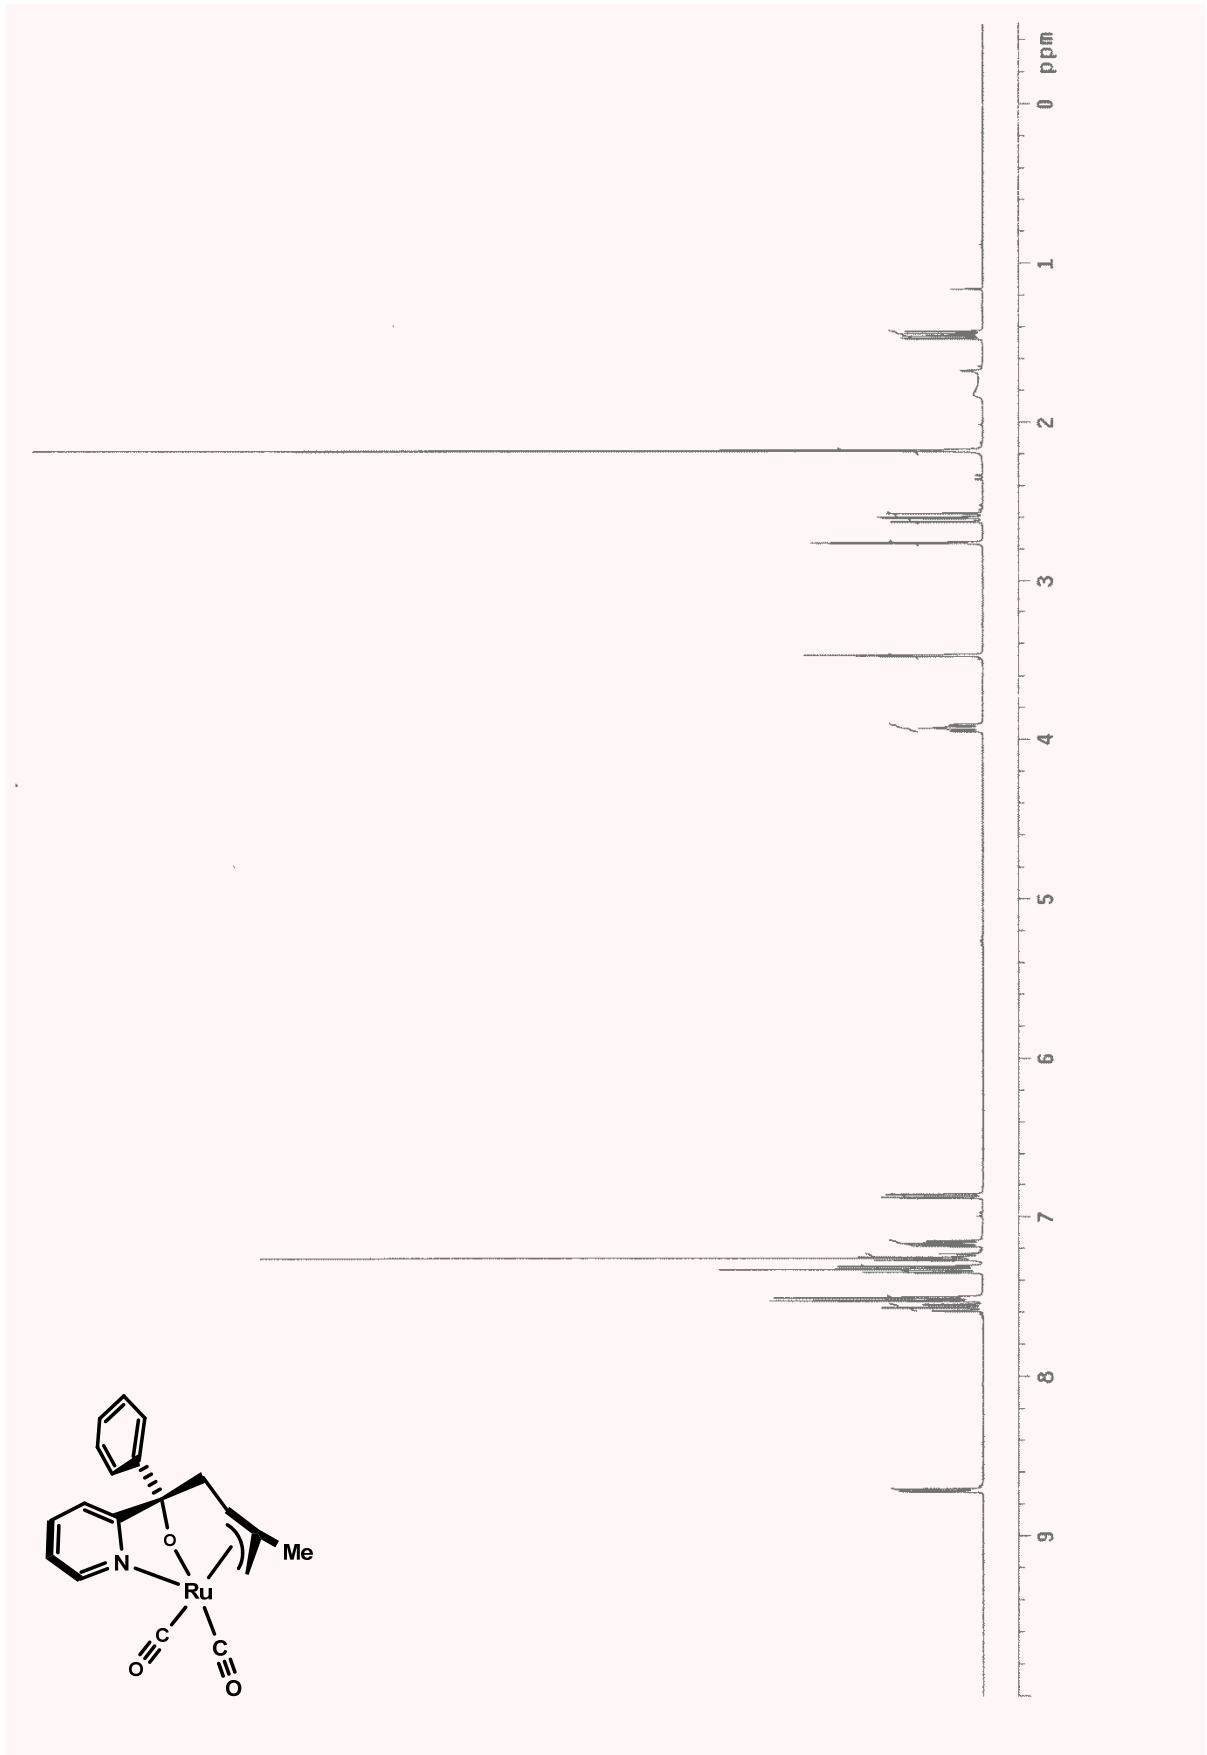

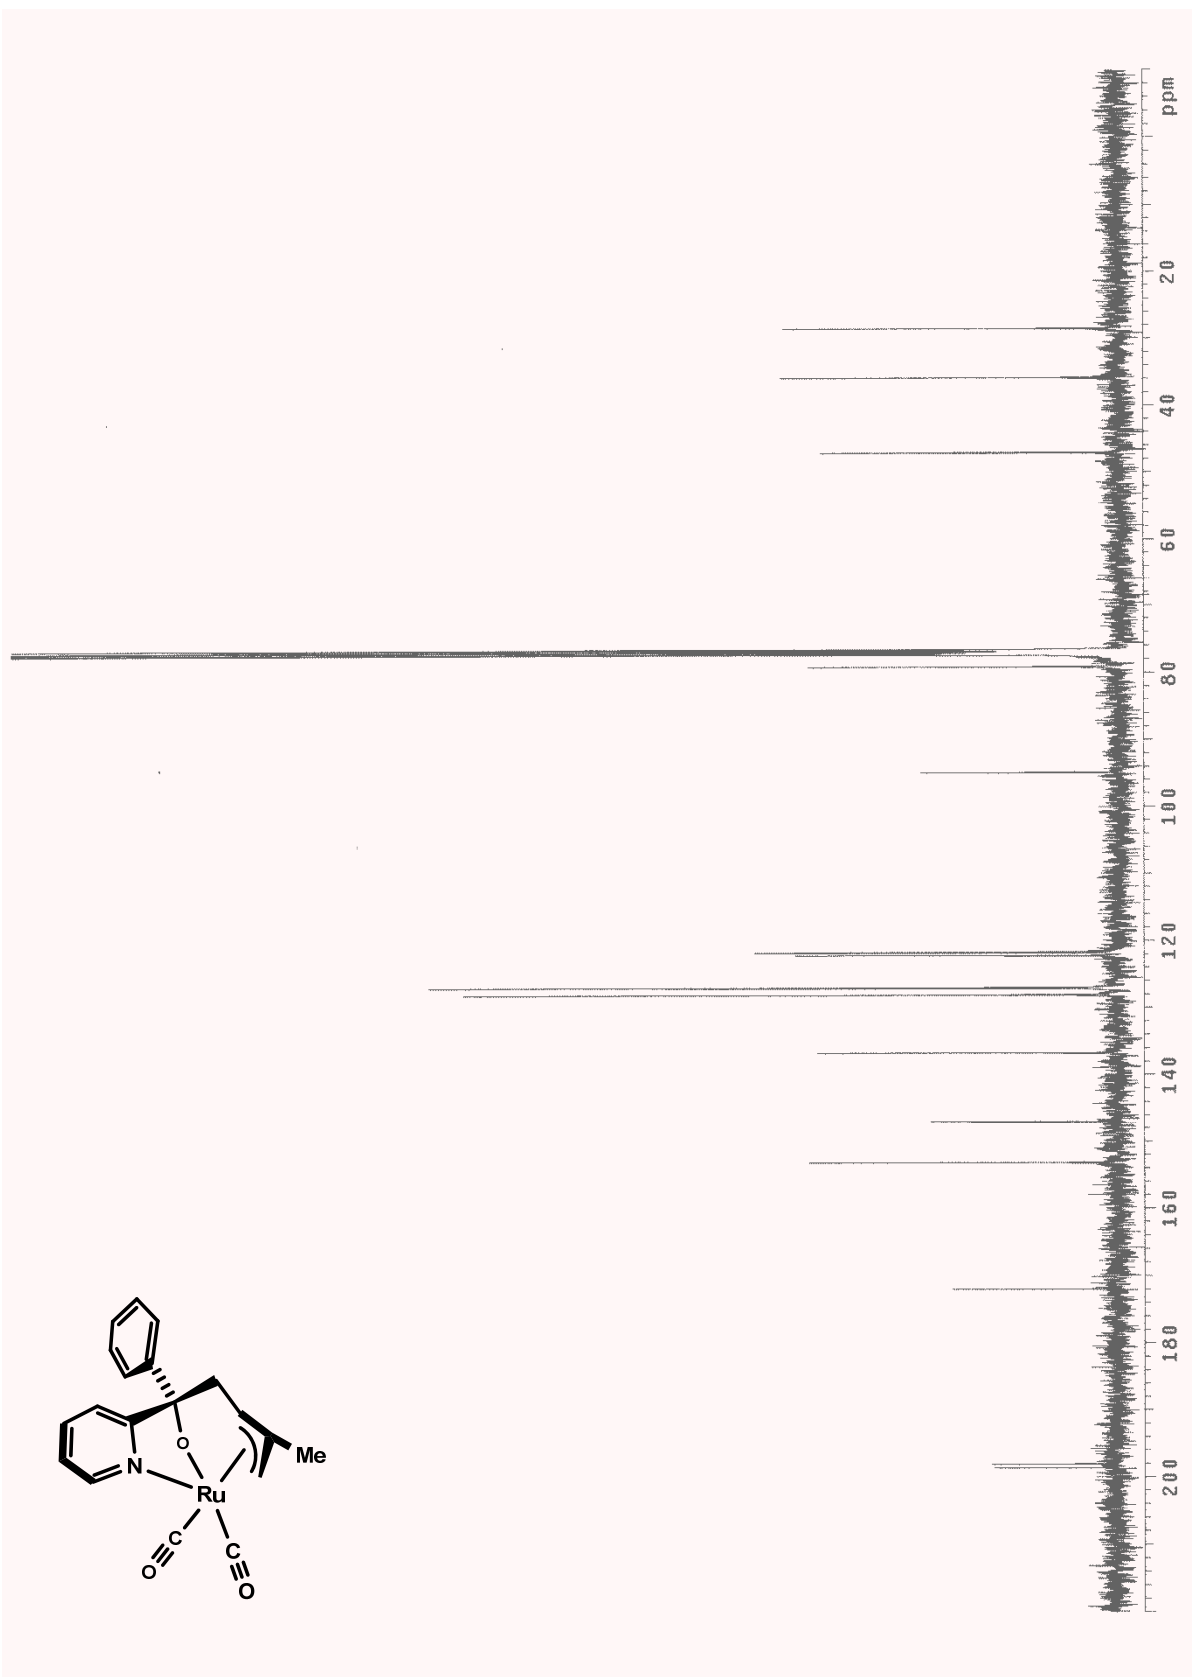

## Crystallographic Material for $\pi$ -Allyl Oxaruthenacycle complex derived from isoprene.

X-ray Experimental.

Table 1. Crystallographic Data for  $\pi$ -Allyl Oxaruthenacycle complex derived from isoprene.

Table 2. Fractional coordinates and equivalent isotropic thermal parameters ( $\text{\AA}^2$ ) for the non-hydrogen atoms of  $\pi$ -Allyl Oxaruthenacycle complex derived from isoprene.

Table 3. Bond Lengths ( $\text{\AA}$ ) and Angles ( $^\circ$ ) for the non-hydrogen atoms of  $\pi$ -Allyl Oxaruthenacycle complex derived from isoprene.

Table 4. Anisotropic thermal parameters for the non-hydrogen atoms of  $\pi$ -Allyl Oxaruthenacycle complex derived from isoprene.

Table 5. Fractional coordinates and isotropic thermal parameters ( $\text{\AA}^2$ ) for the hydrogen atoms of  $\pi$ -Allyl Oxaruthenacycle complex derived from isoprene.

Table 6. Torsion Angles ( $^\circ$ ) for the non-hydrogen atoms of  $\pi$ -Allyl Oxaruthenacycle complex derived from isoprene.

Table 1. Crystal data and structure refinement for  $\pi$ -Allyl Oxaruthenacycle complex derived from isoprene.

|                                   |                                                           |                 |
|-----------------------------------|-----------------------------------------------------------|-----------------|
| Identification code               | shelxl                                                    |                 |
| Empirical formula                 | C <sub>19</sub> H <sub>17.20</sub> N O <sub>3.10</sub> Ru |                 |
| Formula weight                    | 410.21                                                    |                 |
| Temperature                       | 100(2) K                                                  |                 |
| Wavelength                        | 0.71073 Å                                                 |                 |
| Crystal system                    | Monoclinic                                                |                 |
| Space group                       | P2 <sub>1</sub> /n                                        |                 |
| Unit cell dimensions              | a = 8.0576(18) Å                                          | a = 90°.        |
|                                   | b = 9.927(2) Å                                            | b = 93.986(3)°. |
|                                   | c = 21.084(5) Å                                           | g = 90°.        |
| Volume                            | 1682.5(6) Å <sup>3</sup>                                  |                 |
| Z                                 | 4                                                         |                 |
| Density (calculated)              | 1.619 Mg/m <sup>3</sup>                                   |                 |
| Absorption coefficient            | 0.949 mm <sup>-1</sup>                                    |                 |
| F(000)                            | 828                                                       |                 |
| Crystal size                      | 0.24 x 0.05 x 0.04 mm <sup>3</sup>                        |                 |
| Theta range for data collection   | 1.94 to 27.50°.                                           |                 |
| Index ranges                      | -10 ≤ h ≤ 10, -12 ≤ k ≤ 12, -27 ≤ l ≤ 27                  |                 |
| Reflections collected             | 24210                                                     |                 |
| Independent reflections           | 3865 [R(int) = 0.0338]                                    |                 |
| Completeness to theta = 27.50°    | 99.9 %                                                    |                 |
| Absorption correction             | Semi-empirical from equivalents                           |                 |
| Max. and min. transmission        | 1.00 and 0.875                                            |                 |
| Refinement method                 | Full-matrix least-squares on F <sup>2</sup>               |                 |
| Data / restraints / parameters    | 3865 / 0 / 234                                            |                 |
| Goodness-of-fit on F <sup>2</sup> | 1.001                                                     |                 |
| Final R indices [I > 2σ(I)]       | R1 = 0.0246, wR2 = 0.0583                                 |                 |
| R indices (all data)              | R1 = 0.0279, wR2 = 0.0604                                 |                 |
| Largest diff. peak and hole       | 0.829 and -0.620 e.Å <sup>-3</sup>                        |                 |

Table 2. Atomic coordinates ( $\times 10^4$ ) and equivalent isotropic displacement parameters ( $\text{\AA}^2 \times 10^3$ ) for  $\pi$ -Allyl Oxaruthenacycle complex derived from isoprene.  $U(\text{eq})$  is defined as one third of the trace of the orthogonalized  $U^{ij}$  tensor.

|     | x        | y        | z       | $U(\text{eq})$ |
|-----|----------|----------|---------|----------------|
| C1  | -421(2)  | 4945(2)  | 1742(1) | 15(1)          |
| C2  | -1423(2) | 4892(2)  | 2249(1) | 18(1)          |
| C3  | -693(2)  | 4591(2)  | 2848(1) | 18(1)          |
| C4  | 1022(2)  | 4398(2)  | 2924(1) | 16(1)          |
| C5  | 1970(2)  | 4512(2)  | 2402(1) | 12(1)          |
| C6  | 3880(2)  | 4405(2)  | 2403(1) | 13(1)          |
| C7  | 4713(2)  | 4811(2)  | 3046(1) | 13(1)          |
| C8  | 4892(2)  | 3913(2)  | 3556(1) | 17(1)          |
| C9  | 5635(3)  | 4311(2)  | 4140(1) | 21(1)          |
| C10 | 6231(2)  | 5615(2)  | 4223(1) | 20(1)          |
| C11 | 6073(2)  | 6513(2)  | 3718(1) | 18(1)          |
| C12 | 5320(2)  | 6119(2)  | 3135(1) | 14(1)          |
| C13 | 4357(2)  | 2953(2)  | 2211(1) | 14(1)          |
| C14 | 3657(2)  | 2600(2)  | 1550(1) | 14(1)          |
| C15 | 4428(2)  | 2724(2)  | 971(1)  | 16(1)          |
| C16 | 5416(2)  | 3862(2)  | 844(1)  | 18(1)          |
| C17 | 3940(3)  | 1742(2)  | 442(1)  | 22(1)          |
| C18 | 3052(2)  | 6427(2)  | 807(1)  | 19(1)          |
| C19 | 1657(3)  | 4069(2)  | 413(1)  | 20(1)          |
| N1  | 1236(2)  | 4748(2)  | 1814(1) | 12(1)          |
| O1  | 4384(2)  | 5253(1)  | 1924(1) | 12(1)          |
| O2  | 3127(2)  | 7498(2)  | 619(1)  | 28(1)          |
| O3  | 821(2)   | 3696(2)  | -16(1)  | 34(1)          |
| Ru1 | 3019(1)  | 4626(1)  | 1115(1) | 12(1)          |
| O1W | 6490(20) | 6941(17) | 1280(8) | 32(4)          |

Table 3. Bond lengths [Å] and angles [°] for  $\pi$ -Allyl Oxaruthenacycle complex derived from isoprene.

---

|          |            |
|----------|------------|
| C1-N1    | 1.347(2)   |
| C1-C2    | 1.385(3)   |
| C1-H1    | 0.9500     |
| C2-C3    | 1.388(3)   |
| C2-H2    | 0.9500     |
| C3-C4    | 1.393(3)   |
| C3-H3    | 0.9500     |
| C4-C5    | 1.387(3)   |
| C4-H4    | 0.9500     |
| C5-N1    | 1.356(2)   |
| C5-C6    | 1.543(2)   |
| C6-O1    | 1.397(2)   |
| C6-C7    | 1.526(3)   |
| C6-C13   | 1.553(3)   |
| C7-C12   | 1.396(3)   |
| C7-C8    | 1.395(3)   |
| C8-C9    | 1.389(3)   |
| C8-H8    | 0.9500     |
| C9-C10   | 1.387(3)   |
| C9-H9    | 0.9500     |
| C10-C11  | 1.387(3)   |
| C10-H10  | 0.9500     |
| C11-C12  | 1.389(3)   |
| C11-H11  | 0.9500     |
| C12-H12  | 0.9500     |
| C13-C14  | 1.508(3)   |
| C13-H13A | 0.9900     |
| C13-H13B | 0.9900     |
| C14-C15  | 1.414(3)   |
| C14-Ru1  | 2.255(2)   |
| C14-H14  | 0.92(2)    |
| C15-C16  | 1.418(3)   |
| C15-C17  | 1.512(3)   |
| C15-Ru1  | 2.2346(19) |

|           |            |
|-----------|------------|
| C16-Ru1   | 2.1878(19) |
| C16-H16B  | 0.96(2)    |
| C16-H16A  | 0.95(2)    |
| C17-H17A  | 0.9800     |
| C17-H17B  | 0.9800     |
| C17-H17C  | 0.9800     |
| C18-O2    | 1.139(3)   |
| C18-Ru1   | 1.903(2)   |
| C19-O3    | 1.150(2)   |
| C19-Ru1   | 1.865(2)   |
| N1-Ru1    | 2.1316(16) |
| O1-Ru1    | 2.0592(13) |
| O1-O1W    | 2.799(16)  |
| O2-O1W    | 3.01(17)   |
|           |            |
| N1-C1-C2  | 122.33(18) |
| N1-C1-H1  | 118.8      |
| C2-C1-H1  | 118.8      |
| C1-C2-C3  | 118.49(18) |
| C1-C2-H2  | 120.8      |
| C3-C2-H2  | 120.8      |
| C2-C3-C4  | 119.20(18) |
| C2-C3-H3  | 120.4      |
| C4-C3-H3  | 120.4      |
| C5-C4-C3  | 119.65(18) |
| C5-C4-H4  | 120.2      |
| C3-C4-H4  | 120.2      |
| N1-C5-C4  | 120.66(17) |
| N1-C5-C6  | 112.63(15) |
| C4-C5-C6  | 126.71(17) |
| O1-C6-C7  | 110.59(15) |
| O1-C6-C5  | 107.32(14) |
| C7-C6-C5  | 111.12(15) |
| O1-C6-C13 | 106.40(14) |
| C7-C6-C13 | 112.01(15) |
| C5-C6-C13 | 109.19(15) |



|               |            |
|---------------|------------|
| C12-C7-C8     | 118.36(17) |
| C12-C7-C6     | 119.54(16) |
| C8-C7-C6      | 122.10(17) |
| C9-C8-C7      | 121.07(19) |
| C9-C8-H8      | 119.5      |
| C7-C8-H8      | 119.5      |
| C8-C9-C10     | 120.06(19) |
| C8-C9-H9      | 120.0      |
| C10-C9-H9     | 120.0      |
| C11-C10-C9    | 119.39(19) |
| C11-C10-H10   | 120.3      |
| C9-C10-H10    | 120.3      |
| C10-C11-C12   | 120.63(19) |
| C10-C11-H11   | 119.7      |
| C12-C11-H11   | 119.7      |
| C11-C12-C7    | 120.49(18) |
| C11-C12-H12   | 119.8      |
| C7-C12-H12    | 119.8      |
| C14-C13-C6    | 111.85(15) |
| C14-C13-H13A  | 109.2      |
| C6-C13-H13A   | 109.2      |
| C14-C13-H13B  | 109.2      |
| C6-C13-H13B   | 109.2      |
| H13A-C13-H13B | 107.9      |
| C15-C14-C13   | 128.30(17) |
| C15-C14-Ru1   | 70.87(11)  |
| C13-C14-Ru1   | 103.24(12) |
| C15-C14-H14   | 113.5(13)  |
| C13-C14-H14   | 114.3(13)  |
| Ru1-C14-H14   | 116.8(13)  |
| C14-C15-C16   | 121.21(18) |
| C14-C15-C17   | 118.26(18) |
| C16-C15-C17   | 119.70(17) |
| C14-C15-Ru1   | 72.41(11)  |
| C16-C15-Ru1   | 69.52(11)  |
| C17-C15-Ru1   | 122.46(13) |

|               |            |
|---------------|------------|
| C15-C16-Ru1   | 73.10(11)  |
| C15-C16-H16B  | 117.6(15)  |
| Ru1-C16-H16B  | 123.6(14)  |
| C15-C16-H16A  | 119.9(14)  |
| Ru1-C16-H16A  | 98.9(14)   |
| H16B-C16-H16A | 115.7(19)  |
| C15-C17-H17A  | 109.5      |
| C15-C17-H17B  | 109.5      |
| H17A-C17-H17B | 109.5      |
| C15-C17-H17C  | 109.5      |
| H17A-C17-H17C | 109.5      |
| H17B-C17-H17C | 109.5      |
| O2-C18-Ru1    | 177.68(18) |
| O3-C19-Ru1    | 178.48(19) |
| C1-N1-C5      | 119.56(16) |
| C1-N1-Ru1     | 129.89(13) |
| C5-N1-Ru1     | 110.45(12) |
| C6-O1-Ru1     | 104.51(10) |
| C19-Ru1-C18   | 91.66(9)   |
| C19-Ru1-O1    | 176.18(7)  |
| C18-Ru1-O1    | 88.80(7)   |
| C19-Ru1-N1    | 100.23(8)  |
| C18-Ru1-N1    | 102.04(7)  |
| O1-Ru1-N1     | 75.98(6)   |
| C19-Ru1-C16   | 99.87(8)   |
| C18-Ru1-C16   | 101.70(8)  |
| O1-Ru1-C16    | 83.74(7)   |
| N1-Ru1-C16    | 148.24(7)  |
| C19-Ru1-C15   | 85.27(8)   |
| C18-Ru1-C15   | 136.69(8)  |
| O1-Ru1-C15    | 96.99(6)   |
| N1-Ru1-C15    | 121.05(7)  |
| C16-Ru1-C15   | 37.38(8)   |
| C19-Ru1-C14   | 99.40(8)   |
| C18-Ru1-C14   | 165.60(8)  |
| O1-Ru1-C14    | 80.78(6)   |

|             |          |
|-------------|----------|
| N1-Ru1-C14  | 85.14(6) |
| C16-Ru1-C14 | 67.46(7) |
| C15-Ru1-C14 | 36.72(7) |

---

Symmetry transformations used to generate equivalent atoms:

Table 4. Anisotropic displacement parameters ( $\text{\AA}^2 \times 10^3$ ) for  $\pi$ -Allyl Oxaruthenacycle complex derived from isoprene. The anisotropic displacement factor exponent takes the form:  $-2p^2[ h^2 a^*2U^{11} + \dots + 2 h k a^* b^* U^{12} ]$

|     | U <sup>11</sup> | U <sup>22</sup> | U <sup>33</sup> | U <sup>23</sup> | U <sup>13</sup> | U <sup>12</sup> |
|-----|-----------------|-----------------|-----------------|-----------------|-----------------|-----------------|
| C1  | 12(1)           | 16(1)           | 17(1)           | -4(1)           | -2(1)           | 1(1)            |
| C2  | 12(1)           | 18(1)           | 24(1)           | -4(1)           | 1(1)            | -2(1)           |
| C3  | 14(1)           | 21(1)           | 19(1)           | -2(1)           | 5(1)            | -3(1)           |
| C4  | 15(1)           | 16(1)           | 16(1)           | 0(1)            | 0(1)            | -2(1)           |
| C5  | 11(1)           | 8(1)            | 15(1)           | -1(1)           | 0(1)            | -1(1)           |
| C6  | 10(1)           | 14(1)           | 14(1)           | 1(1)            | 1(1)            | 0(1)            |
| C7  | 9(1)            | 16(1)           | 13(1)           | -1(1)           | 1(1)            | 1(1)            |
| C8  | 18(1)           | 16(1)           | 17(1)           | 2(1)            | -1(1)           | -2(1)           |
| C9  | 22(1)           | 25(1)           | 15(1)           | 5(1)            | -2(1)           | 0(1)            |
| C10 | 17(1)           | 28(1)           | 14(1)           | -4(1)           | -4(1)           | 1(1)            |
| C11 | 16(1)           | 17(1)           | 20(1)           | -4(1)           | -2(1)           | 0(1)            |
| C12 | 12(1)           | 16(1)           | 16(1)           | 1(1)            | 0(1)            | 2(1)            |
| C13 | 14(1)           | 15(1)           | 14(1)           | 1(1)            | 0(1)            | 2(1)            |
| C14 | 12(1)           | 13(1)           | 17(1)           | -1(1)           | -2(1)           | 2(1)            |
| C15 | 13(1)           | 19(1)           | 17(1)           | -3(1)           | 0(1)            | 8(1)            |
| C16 | 13(1)           | 26(1)           | 16(1)           | -2(1)           | 3(1)            | 4(1)            |
| C17 | 21(1)           | 24(1)           | 22(1)           | -8(1)           | -1(1)           | 5(1)            |
| C18 | 19(1)           | 22(1)           | 14(1)           | -2(1)           | 3(1)            | 4(1)            |
| C19 | 21(1)           | 18(1)           | 22(1)           | -2(1)           | -1(1)           | 8(1)            |
| N1  | 11(1)           | 12(1)           | 14(1)           | -2(1)           | 0(1)            | -1(1)           |
| O1  | 11(1)           | 15(1)           | 10(1)           | 0(1)            | 0(1)            | -2(1)           |
| O2  | 42(1)           | 21(1)           | 23(1)           | 4(1)            | 12(1)           | 4(1)            |
| O3  | 38(1)           | 30(1)           | 30(1)           | -13(1)          | -20(1)          | 13(1)           |
| Ru1 | 11(1)           | 15(1)           | 10(1)           | -1(1)           | 0(1)            | 2(1)            |

Table 5. Hydrogen coordinates ( $\times 10^4$ ) and isotropic displacement parameters ( $\text{\AA}^2 \times 10^3$ ) for  $\pi$ -Allyl Oxaruthenacycle complex derived from isoprene.

|      | x        | y        | z        | U(eq) |
|------|----------|----------|----------|-------|
| H1   | -919     | 5126     | 1330     | 18    |
| H2   | -2584    | 5059     | 2189     | 22    |
| H3   | -1355    | 4517     | 3202     | 22    |
| H4   | 1539     | 4189     | 3330     | 19    |
| H8   | 4499     | 3016     | 3502     | 21    |
| H9   | 5736     | 3690     | 4483     | 25    |
| H10  | 6742     | 5890     | 4621     | 24    |
| H11  | 6483     | 7406     | 3772     | 21    |
| H12  | 5218     | 6745     | 2794     | 17    |
| H13A | 5584     | 2871     | 2232     | 17    |
| H13B | 3933     | 2305     | 2518     | 17    |
| H17A | 4745     | 1001     | 450      | 33    |
| H17B | 3929     | 2207     | 32       | 33    |
| H17C | 2829     | 1382     | 502      | 33    |
| H14  | 2820(30) | 1960(20) | 1537(10) | 12(5) |
| H16B | 5790(30) | 3950(20) | 425(11)  | 24(6) |
| H16A | 6110(30) | 4250(20) | 1175(11) | 20(6) |

Table 6. Torsion angles [°] for  $\pi$ -Allyl Oxaruthenacycle complex derived from isoprene.

|                 |             |
|-----------------|-------------|
| N1-C1-C2-C3     | -1.7(3)     |
| C1-C2-C3-C4     | 2.2(3)      |
| C2-C3-C4-C5     | 0.1(3)      |
| C3-C4-C5-N1     | -3.0(3)     |
| C3-C4-C5-C6     | 176.59(17)  |
| N1-C5-C6-O1     | 31.7(2)     |
| C4-C5-C6-O1     | -147.92(18) |
| N1-C5-C6-C7     | 152.73(15)  |
| C4-C5-C6-C7     | -26.9(3)    |
| N1-C5-C6-C13    | -83.22(18)  |
| C4-C5-C6-C13    | 97.1(2)     |
| O1-C6-C7-C12    | 22.1(2)     |
| C5-C6-C7-C12    | -97.00(19)  |
| C13-C6-C7-C12   | 140.57(17)  |
| O1-C6-C7-C8     | -157.97(16) |
| C5-C6-C7-C8     | 83.0(2)     |
| C13-C6-C7-C8    | -39.5(2)    |
| C12-C7-C8-C9    | 0.8(3)      |
| C6-C7-C8-C9     | -179.13(18) |
| C7-C8-C9-C10    | -0.7(3)     |
| C8-C9-C10-C11   | 0.2(3)      |
| C9-C10-C11-C12  | 0.3(3)      |
| C10-C11-C12-C7  | -0.2(3)     |
| C8-C7-C12-C11   | -0.4(3)     |
| C6-C7-C12-C11   | 179.57(16)  |
| O1-C6-C13-C14   | -53.92(19)  |
| C7-C6-C13-C14   | -174.88(15) |
| C5-C6-C13-C14   | 61.61(19)   |
| C6-C13-C14-C15  | 93.5(2)     |
| C6-C13-C14-Ru1  | 17.61(17)   |
| C13-C14-C15-C16 | -40.4(3)    |
| Ru1-C14-C15-C16 | 51.59(16)   |
| C13-C14-C15-C17 | 150.04(19)  |
| Ru1-C14-C15-C17 | -117.96(17) |

|                 |             |
|-----------------|-------------|
| C13-C14-C15-Ru1 | -92.00(19)  |
| C14-C15-C16-Ru1 | -52.88(16)  |
| C17-C15-C16-Ru1 | 116.52(17)  |
| C2-C1-N1-C5     | -1.1(3)     |
| C2-C1-N1-Ru1    | 174.79(14)  |
| C4-C5-N1-C1     | 3.5(3)      |
| C6-C5-N1-C1     | -176.15(16) |
| C4-C5-N1-Ru1    | -173.14(14) |
| C6-C5-N1-Ru1    | 7.20(17)    |
| C7-C6-O1-Ru1    | -176.35(11) |
| C5-C6-O1-Ru1    | -55.00(14)  |
| C13-C6-O1-Ru1   | 61.78(14)   |
| C6-O1-Ru1-C19   | 52.1(11)    |
| C6-O1-Ru1-C18   | 149.08(12)  |
| C6-O1-Ru1-N1    | 46.36(11)   |
| C6-O1-Ru1-C16   | -109.01(12) |
| C6-O1-Ru1-C15   | -73.97(11)  |
| C6-O1-Ru1-C14   | -40.90(11)  |
| C1-N1-Ru1-C19   | -25.08(18)  |
| C5-N1-Ru1-C19   | 151.12(13)  |
| C1-N1-Ru1-C18   | 68.85(18)   |
| C5-N1-Ru1-C18   | -114.95(13) |
| C1-N1-Ru1-O1    | 154.53(18)  |
| C5-N1-Ru1-O1    | -29.27(11)  |
| C1-N1-Ru1-C16   | -153.56(17) |
| C5-N1-Ru1-C16   | 22.6(2)     |
| C1-N1-Ru1-C15   | -115.70(17) |
| C5-N1-Ru1-C15   | 60.50(14)   |
| C1-N1-Ru1-C14   | -123.78(17) |
| C5-N1-Ru1-C14   | 52.42(12)   |
| C15-C16-Ru1-C19 | -68.57(13)  |
| C15-C16-Ru1-C18 | -162.35(12) |
| C15-C16-Ru1-O1  | 110.18(11)  |
| C15-C16-Ru1-N1  | 59.99(18)   |
| C15-C16-Ru1-C14 | 27.59(11)   |
| C14-C15-Ru1-C19 | -112.64(13) |

|                 |             |
|-----------------|-------------|
| C16-C15-Ru1-C19 | 113.05(13)  |
| C17-C15-Ru1-C19 | 0.14(17)    |
| C14-C15-Ru1-C18 | 159.97(12)  |
| C16-C15-Ru1-C18 | 25.65(17)   |
| C17-C15-Ru1-C18 | -87.26(19)  |
| C14-C15-Ru1-O1  | 64.27(11)   |
| C16-C15-Ru1-O1  | -70.05(12)  |
| C17-C15-Ru1-O1  | 177.04(16)  |
| C14-C15-Ru1-N1  | -13.54(13)  |
| C16-C15-Ru1-N1  | -147.85(11) |
| C17-C15-Ru1-N1  | 99.24(16)   |
| C14-C15-Ru1-C16 | 134.32(17)  |
| C17-C15-Ru1-C16 | -112.9(2)   |
| C16-C15-Ru1-C14 | -134.32(17) |
| C17-C15-Ru1-C14 | 112.8(2)    |
| C15-C14-Ru1-C19 | 68.80(13)   |
| C13-C14-Ru1-C19 | -164.87(12) |
| C15-C14-Ru1-C18 | -70.9(3)    |
| C13-C14-Ru1-C18 | 55.4(3)     |
| C15-C14-Ru1-O1  | -115.06(11) |
| C13-C14-Ru1-O1  | 11.26(11)   |
| C15-C14-Ru1-N1  | 168.39(12)  |
| C13-C14-Ru1-N1  | -65.29(12)  |
| C15-C14-Ru1-C16 | -28.05(11)  |
| C13-C14-Ru1-C16 | 98.27(13)   |
| C13-C14-Ru1-C15 | 126.32(17)  |

---

Symmetry transformations used to generate equivalent atoms:



X-ray Experimental for  $(C_{17}H_{17}NO)Ru(CO)_2 \cdot 0.1 H_2O$ : Crystals grew as clusters of large colorless needles by slow evaporation from toluene. The data crystal was cut from a cluster of crystals and had approximate dimensions; 0.24 x 0.05 x 0.04 mm. The data were collected on a Rigaku AFC12 diffractometer with a Saturn 724+ CCD using a graphite monochromator with MoK $\alpha$  radiation ( $\lambda = 0.71075\text{\AA}$ ). A total of 1344 frames of data were collected using  $\omega$ -scans with a scan range of  $0.5^\circ$  and a counting time of 45 seconds per frame. The data were collected at 153 K using an Oxford Cryostream low temperature device. Details of crystal data, data collection and structure refinement are listed in Table 1. Data reduction were performed using the Rigaku Americas Corporation's Crystal Clear version 1.40.<sup>1</sup> The structure was solved by direct methods using SIR97<sup>2</sup> and refined by full-matrix least-squares on  $F^2$  with anisotropic displacement parameters for the non-H atoms using SHELXL-97.<sup>3</sup> Structure analysis was aided by use of the programs PLATON98<sup>4</sup> and WinGX.<sup>5</sup> Most of the hydrogen atoms were calculated in ideal positions with isotropic displacement parameters set to 1.2xUeq of the attached atom (1.5xUeq for methyl hydrogen atoms). The hydrogen atoms on the allylic carbon atoms were observed in a  $\Delta F$  map and refined with isotropic displacement parameters. A small peak, 1.3 e/ $\text{\AA}^3$ , persisted in the final  $\Delta F$  map. This peak was within H-bonding distance to two oxygen atoms, O1 and O2. As a result, it was assumed to represent a small amount of water that co-crystallized along with the complex. The site occupancy factor for this atom, O1W, was refined while fixing a isotropic displacement parameter to 0.05 yielded an approximate occupancy of close to 10%.

The function,  $\sum w(|F_o|^2 - |F_c|^2)^2$ , was minimized, where  $w = 1/[(\sigma(F_o))^2 + (0.0343*P)^2 + (0.8933*P)]$  and  $P = (|F_o|^2 + 2|F_c|^2)/3$ .  $R_w(F^2)$  refined to 0.0604, with R(F) equal to 0.0246 and a goodness of fit, S, = 1.00. Definitions used for calculating R(F),  $R_w(F^2)$  and the goodness of fit, S, are given below.<sup>6</sup> The data were checked for secondary extinction effects but no correction was necessary. Neutral atom scattering factors and values used to calculate the linear absorption coefficient are from the International Tables for X-ray Crystallography (1992).<sup>7</sup> All figures were generated using SHELXTL/PC.<sup>8</sup> Tables of positional and thermal parameters, bond lengths and angles, torsion angles and figures are found elsewhere.

## References

- 1) CrystalClear 1.40 (2008). Rigaku Americas Corporation, The Woodlands, TX.
- 2) SIR97. (1999). A program for crystal structure solution. Altomare A., Burla M.C., Camalli M., Cascarano G.L., Giacovazzo C., Guagliardi A., Moliterni A.G.G., Polidori G., Spagna R. *J. Appl. Cryst.* 32, 115-119.
- 3) Sheldrick, G. M. (2008). SHELXL97. Program for the Refinement of Crystal Structures. *Acta Cryst.*, A64, 112-122.
- 4) Spek, A. L. (1998). PLATON, A Multipurpose Crystallographic Tool. Utrecht University, The Netherlands.
- 5) WinGX 1.64. (1999). An Integrated System of Windows Programs for the Solution, Refinement and Analysis of Single Crystal X-ray Diffraction Data. Farrugia, L. J. *J. Appl. Cryst.* 32, 837-838.
- 6)  $R_w(F^2) = \left\{ \frac{\sum w(|F_o|^2 - |F_c|^2)^2}{\sum w|F_o|^4} \right\}^{1/2}$  where w is the weight given each reflection.  
 $R(F) = \frac{\sum(|F_o| - |F_c|)}{\sum|F_o|}$  for reflections with  $F_o > 4(\sigma(F_o))$ .  
 $S = \left[ \frac{\sum w(|F_o|^2 - |F_c|^2)^2}{(n - p)} \right]^{1/2}$ , where n is the number of reflections and p is the number of refined parameters.
- 7) International Tables for X-ray Crystallography (1992). Vol. C, Tables 4.2.6.8 and 6.1.1.4, A. J. C. Wilson, editor, Boston: Kluwer Academic Press.
- 8) Sheldrick, G. M. (1994). SHELXTL/PC (Version 5.03). Siemens Analytical X-ray Instruments, Inc., Madison, Wisconsin, USA.

#### d. Ketone Oxidation Level Reaction.

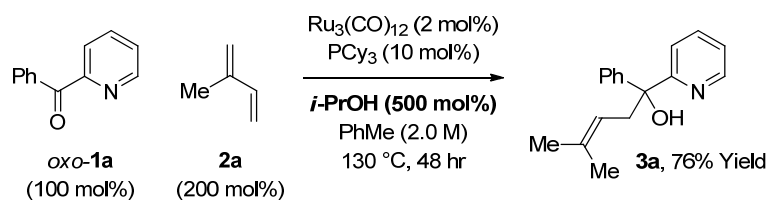

To a pressure tube equipped with magnetic stir bar was added benzoylpyridine (0.300 mmol, 100 mol%),  $\text{Ru}_3(\text{CO})_{12}$  (3.9 mg, 0.006 mmol, 2 mol%) and  $\text{PCy}_3$  (8.4 mg, 0.030 mmol, 10 mol%). The tube was sealed with a rubber septum and purged with argon. Toluene (0.15 mL, 2.0 M concentration with respect to benzoylpyridine), isopropanol (115  $\mu\text{L}$ , 1.500 mmol, 500 mol%), and isoprene (60  $\mu\text{L}$ , 0.600 mmol, 200 mol%) were added. The rubber septum was quickly replaced with a screw cap. The reaction was heated to 130 °C for 48 hr. The reaction mixture was concentrated *in vacuo* and the residue was subjected to flash column chromatography ( $\text{SiO}_2$ , 2.5% EtOAc/hexanes) to furnish the title compound (57.9 mg, 90% yield) as a yellow oil.

**e.  $^1\text{H}$  NMR-Exchange Data.**

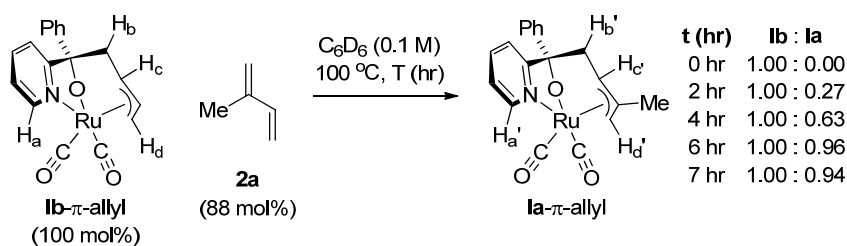

**Procedure:** To a pressure NMR tube was added **Ib- $\pi$ -allyl** (0.060 mmol, 100 mol%). The tube was sealed with a rubber septum, purged with argon. At this stage,  $\text{C}_6\text{D}_6$  (0.60 mL, 0.1 M concentration with respect to **Ib- $\pi$ -allyl**), and isoprene (5.3  $\mu\text{L}$ , 0.053 mmol, 88 mol%) were added. The rubber septum was quickly replaced with a screw cap. The reaction was heated to 100  $^\circ\text{C}$  and  $^1\text{H}$  NMR were recorded every hour (at 25  $^\circ\text{C}$ ).

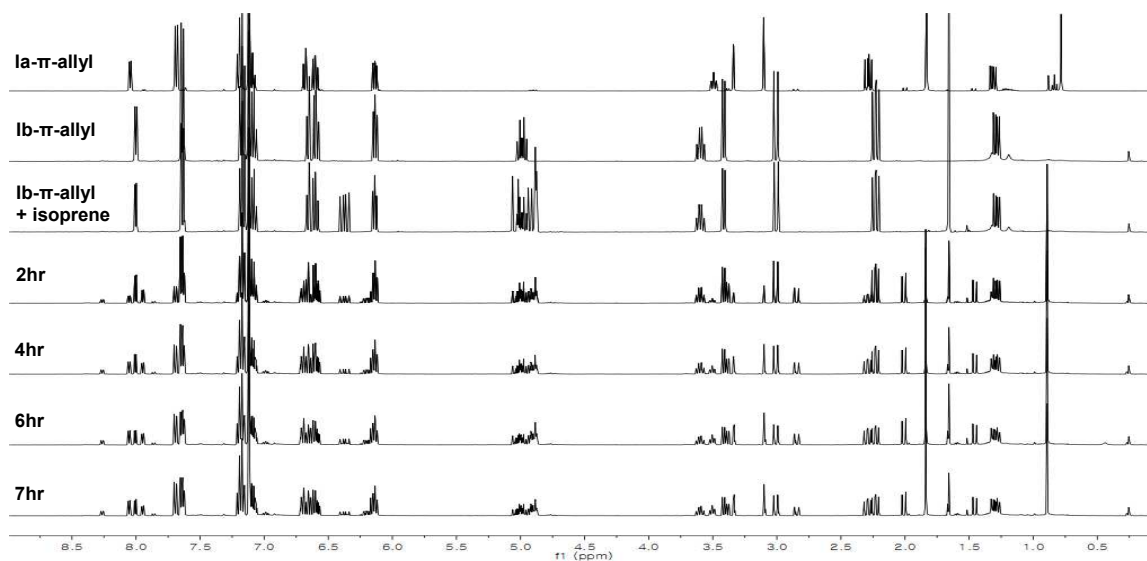

Supplement: NIHMS534985-supplement-1_si_002.pdf [file NIHMS534985-supplement-1_si_002.pdf]
